# Supplementary material
Source: PubMed Central journal article supplement (PMC3489957)

# Synthesis, evaluation of anti-HIV-1 and anti-HCV activity of novel 2',3'-dideoxy-2',2'-difluoro-4'-azanucleosides

Saúl Martínez-Montero,<sup>a,b</sup> Susana Fernández,<sup>a</sup> Yogesh S. Sanghvi,<sup>c</sup> Emmanuel A. Theodorakis,<sup>\*b</sup> Mervi A. Detorio,<sup>d</sup> Tamara R. McBrayer,<sup>e</sup> Tony Whitaker,<sup>e</sup> Raymond F. Schinazi,<sup>d</sup> Vicente Gotor,<sup>\*a</sup> and Miguel Ferrero<sup>\*a</sup>

<sup>a</sup>Departamento de Química Orgánica e Inorgánica and Instituto Universitario de Biotecnología de Asturias, Universidad de Oviedo, 33006-Oviedo (Asturias), Spain

<sup>b</sup>Department of Chemistry and Biochemistry, University of California, San Diego, 9500 Gilman Drive, La Jolla, CA 92093-0358, USA

<sup>c</sup>Rasayan Inc., 2802 Crystal Ridge Road, Encinitas, CA 92024-6615, USA

<sup>d</sup>Center for AIDS Research, Department of Pediatrics, Emory University School of Medicine, and the Veterans Affairs Medical Center, 1670 Clairmont Road, Decatur, Georgia 30033, USA.

<sup>e</sup>RFS Pharma, LLC, 1860 Montreal Road, Tucker, Georgia 30084, USA.

mferrero@uniovi.es, vgs@uniovi.es, etheodor@ucsd.edu

## SUPPORTING INFORMATION (page 1 of 82 pages)

### Table of Contents

#### 1. Copies of <sup>1</sup>H, <sup>13</sup>C, DEPT, and 2D NMR spectra of compounds **12–33**:

|                                             |                                               |                                                |
|---------------------------------------------|-----------------------------------------------|------------------------------------------------|
| <sup>1</sup> H NMR of <b>12</b> ..... S3    | NOESY NMR of <b>18a</b> ... S18               | COSY NMR of <b>18d</b> ..... S33               |
| <sup>13</sup> C NMR of <b>12</b> ..... S4   | NOESY NMR of <b>18a</b> ... S19               | HSQC NMR of <b>18d</b> ..... S34               |
| DEPT NMR of <b>12</b> ..... S5              | <sup>1</sup> H NMR of <b>19a</b> ..... S20    | HMBC NMR of <b>18d</b> ..... S35               |
| <sup>1</sup> H NMR of <b>13</b> ..... S6    | <sup>13</sup> C NMR of <b>19a</b> ..... S21   | NOESY NMR of <b>18d</b> ... S36                |
| <sup>13</sup> C NMR of <b>13</b> ..... S7   | COSY NMR of <b>19a</b> ..... S22              | <sup>1</sup> H NMR of <b>19d</b> ..... S37     |
| DEPT NMR of <b>13</b> ..... S8              | HSQC NMR of <b>19a</b> ..... S23              | <sup>13</sup> C NMR of <b>19d</b> ..... S38    |
| <sup>1</sup> H NMR of <b>14</b> ..... S9    | HMBC NMR of <b>19a</b> ..... S24              | COSY NMR of <b>19d</b> ..... S39               |
| <sup>13</sup> C NMR of <b>14</b> ..... S10  | NOESY NMR of <b>19a</b> ... S25               | HSQC NMR of <b>19d</b> ..... S40               |
| DEPT NMR of <b>14</b> ..... S11             | NOESY NMR of <b>19a</b> ... S26               | HMBC NMR of <b>19d</b> ..... S41               |
| <sup>1</sup> H NMR of <b>15</b> ..... S12   | <sup>1</sup> H NMR of <b>18b/19b</b> .... S27 | NOESY NMR of <b>19d</b> ... S42                |
| <sup>13</sup> C NMR of <b>15</b> ..... S13  | <sup>13</sup> C NMR of <b>18b/19b</b> ... S28 | <sup>1</sup> H NMR of <b>20c/21c</b> ..... S43 |
| <sup>1</sup> H NMR of <b>18a</b> ..... S14  | <sup>1</sup> H NMR of <b>18c/19c</b> .... S29 | <sup>13</sup> C NMR of <b>20c/21c</b> .... S44 |
| <sup>13</sup> C NMR of <b>18a</b> ..... S15 | <sup>13</sup> C NMR of <b>18c/19c</b> ... S30 | <sup>1</sup> H NMR of <b>26</b> ..... S45      |
| COSY NMR of <b>18a</b> ..... S16            | <sup>1</sup> H NMR of <b>18d</b> ..... S31    | <sup>13</sup> C NMR of <b>26</b> ..... S46     |
| HSQC NMR of <b>18a</b> ..... S17            | <sup>13</sup> C NMR of <b>18d</b> ..... S32   | COSY NMR of <b>26</b> ..... S47                |

|                                            |                                            |                                            |
|--------------------------------------------|--------------------------------------------|--------------------------------------------|
| HSQC NMR of <b>26</b> ..... S48            | <sup>13</sup> C NMR of <b>28</b> ..... S59 | <sup>1</sup> H NMR of <b>30</b> ..... S70  |
| HMBC NMR of <b>26</b> ..... S49            | COSY NMR of <b>28</b> ..... S60            | <sup>13</sup> C NMR of <b>30</b> ..... S71 |
| NOESY NMR of <b>26</b> ..... S50           | HSQC NMR of <b>28</b> ..... S61            | <sup>1</sup> H NMR of <b>31</b> ..... S72  |
| <sup>1</sup> H NMR of <b>27</b> ..... S51  | HMBC NMR of <b>28</b> ..... S62            | <sup>13</sup> C NMR of <b>31</b> ..... S73 |
| <sup>13</sup> C NMR of <b>27</b> ..... S52 | NOESY NMR of <b>28</b> ..... S63           | DEPT NMR of <b>31</b> ..... S74            |
| COSY NMR of <b>27</b> ..... S53            | <sup>1</sup> H NMR of <b>29</b> ..... S64  | <sup>1</sup> H NMR of <b>32</b> ..... S75  |
| HSQC NMR of <b>27</b> ..... S54            | <sup>13</sup> C NMR of <b>29</b> ..... S65 | <sup>13</sup> C NMR of <b>32</b> ..... S76 |
| HMBC NMR of <b>27</b> ..... S55            | COSY NMR of <b>29</b> ..... S66            | <sup>1</sup> H NMR of <b>33</b> ..... S77  |
| HMBC NMR of <b>27</b> ..... S56            | HSQC NMR of <b>29</b> ..... S67            | <sup>13</sup> C NMR of <b>33</b> ..... S78 |
| NOESY NMR of <b>27</b> ..... S57           | HMBC NMR of <b>29</b> ..... S68            | DEPT NMR of <b>33</b> ..... S79            |
| <sup>1</sup> H NMR of <b>28</b> ..... S58  | NOESY NMR of <b>29</b> ..... S69           |                                            |

## 2. HPLC Chromatograms on Crudes:

|                                                                                          |     |
|------------------------------------------------------------------------------------------|-----|
| a) After glycosylation of <b>15</b> with uracil. Mixture of <b>16a/17a</b> .....         | S80 |
| b) Mixture of anomers <b>18b/19b</b> after TBDMS deprotection .....                      | S81 |
| c) After glycosylation of <b>15</b> with cytidine. Mixture of <b>16c/17c</b> .....       | S81 |
| d) After glycosylation of <b>15</b> with 5-fluorouracil. Mixture of <b>16d/17d</b> ..... | S82 |
| e) After glycosylation of <b>15</b> with 6-chloropurine .....                            | S82 |

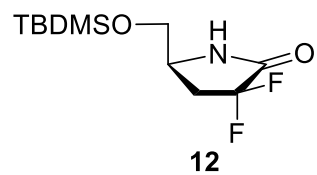

$^1\text{H}$  NMR ( $\text{CDCl}_3$ , 400.13 MHz)

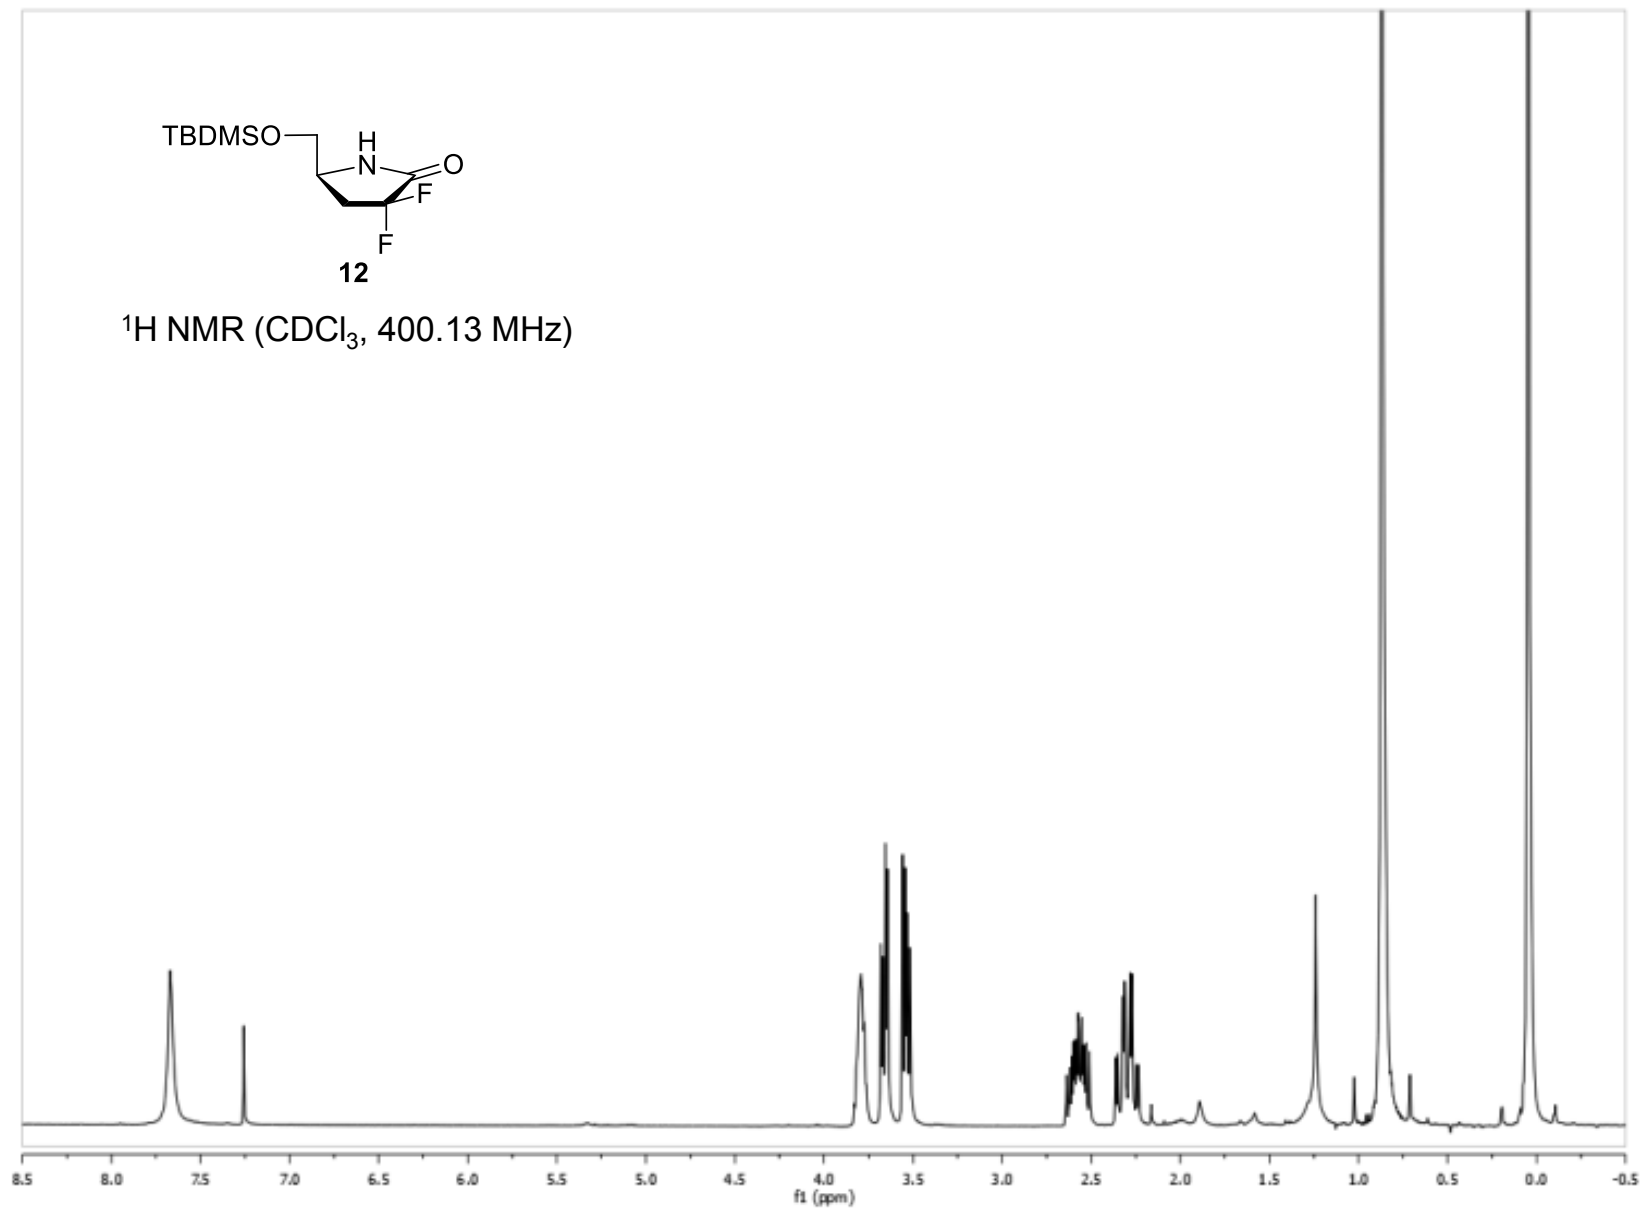

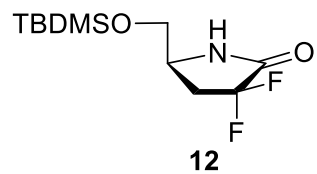

$^{13}\text{C}$  NMR ( $\text{CDCl}_3$ , 100.6 MHz)

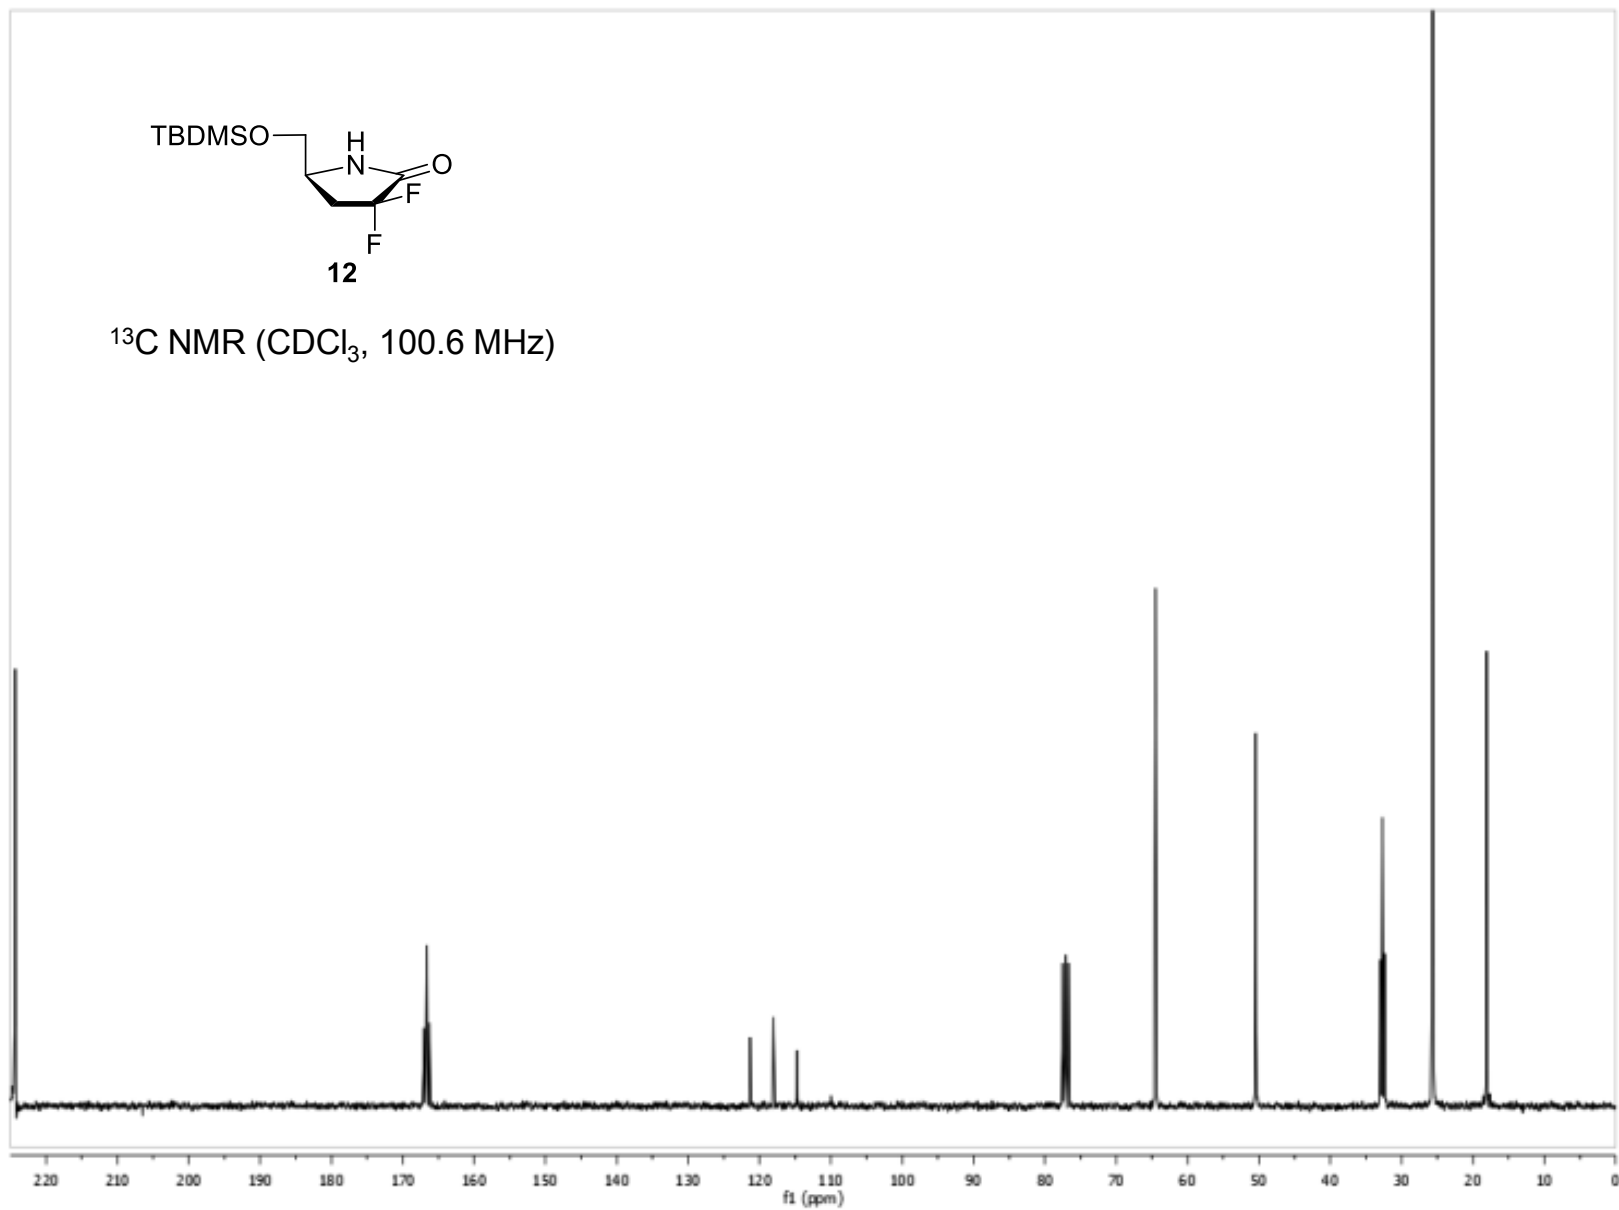



DEPT NMR (CDCl<sub>3</sub>, 100.6 MHz)

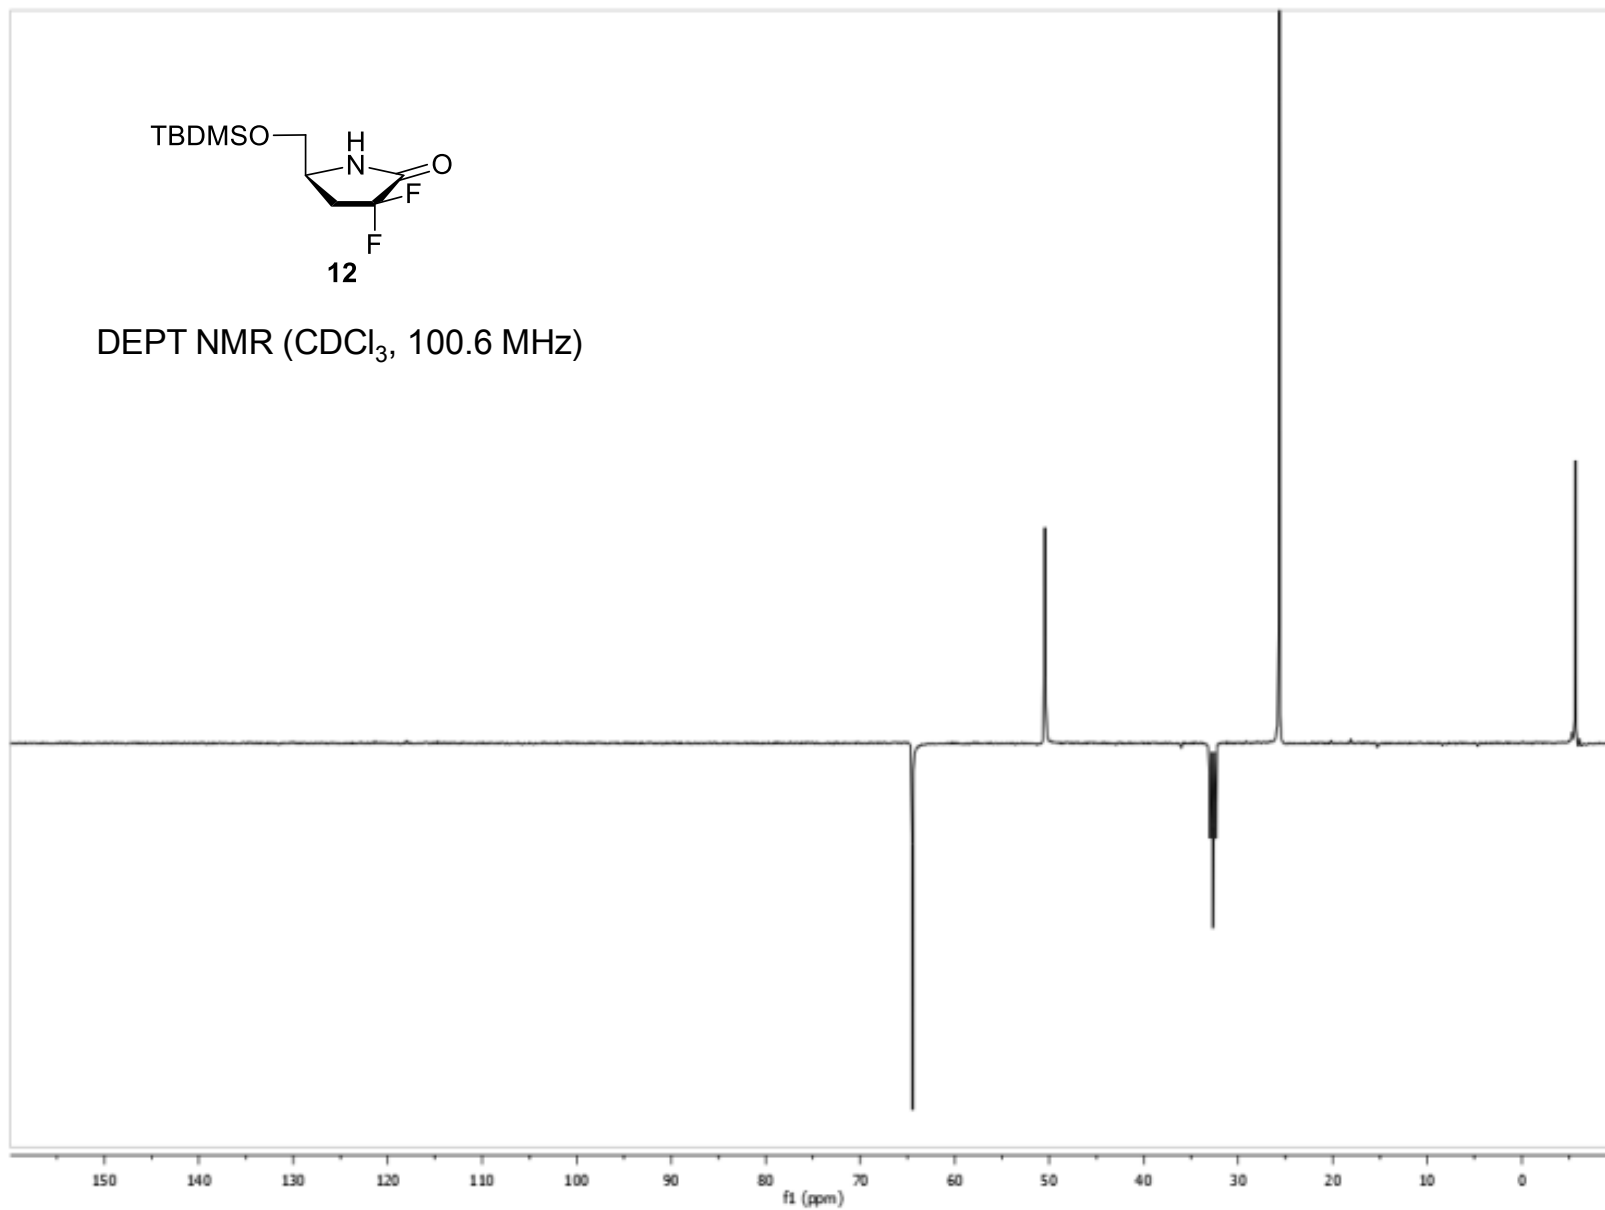

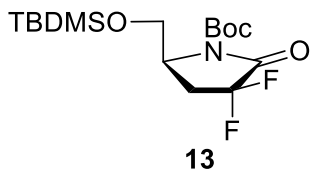

<sup>1</sup>H NMR (CDCl<sub>3</sub>, 400.13 MHz)

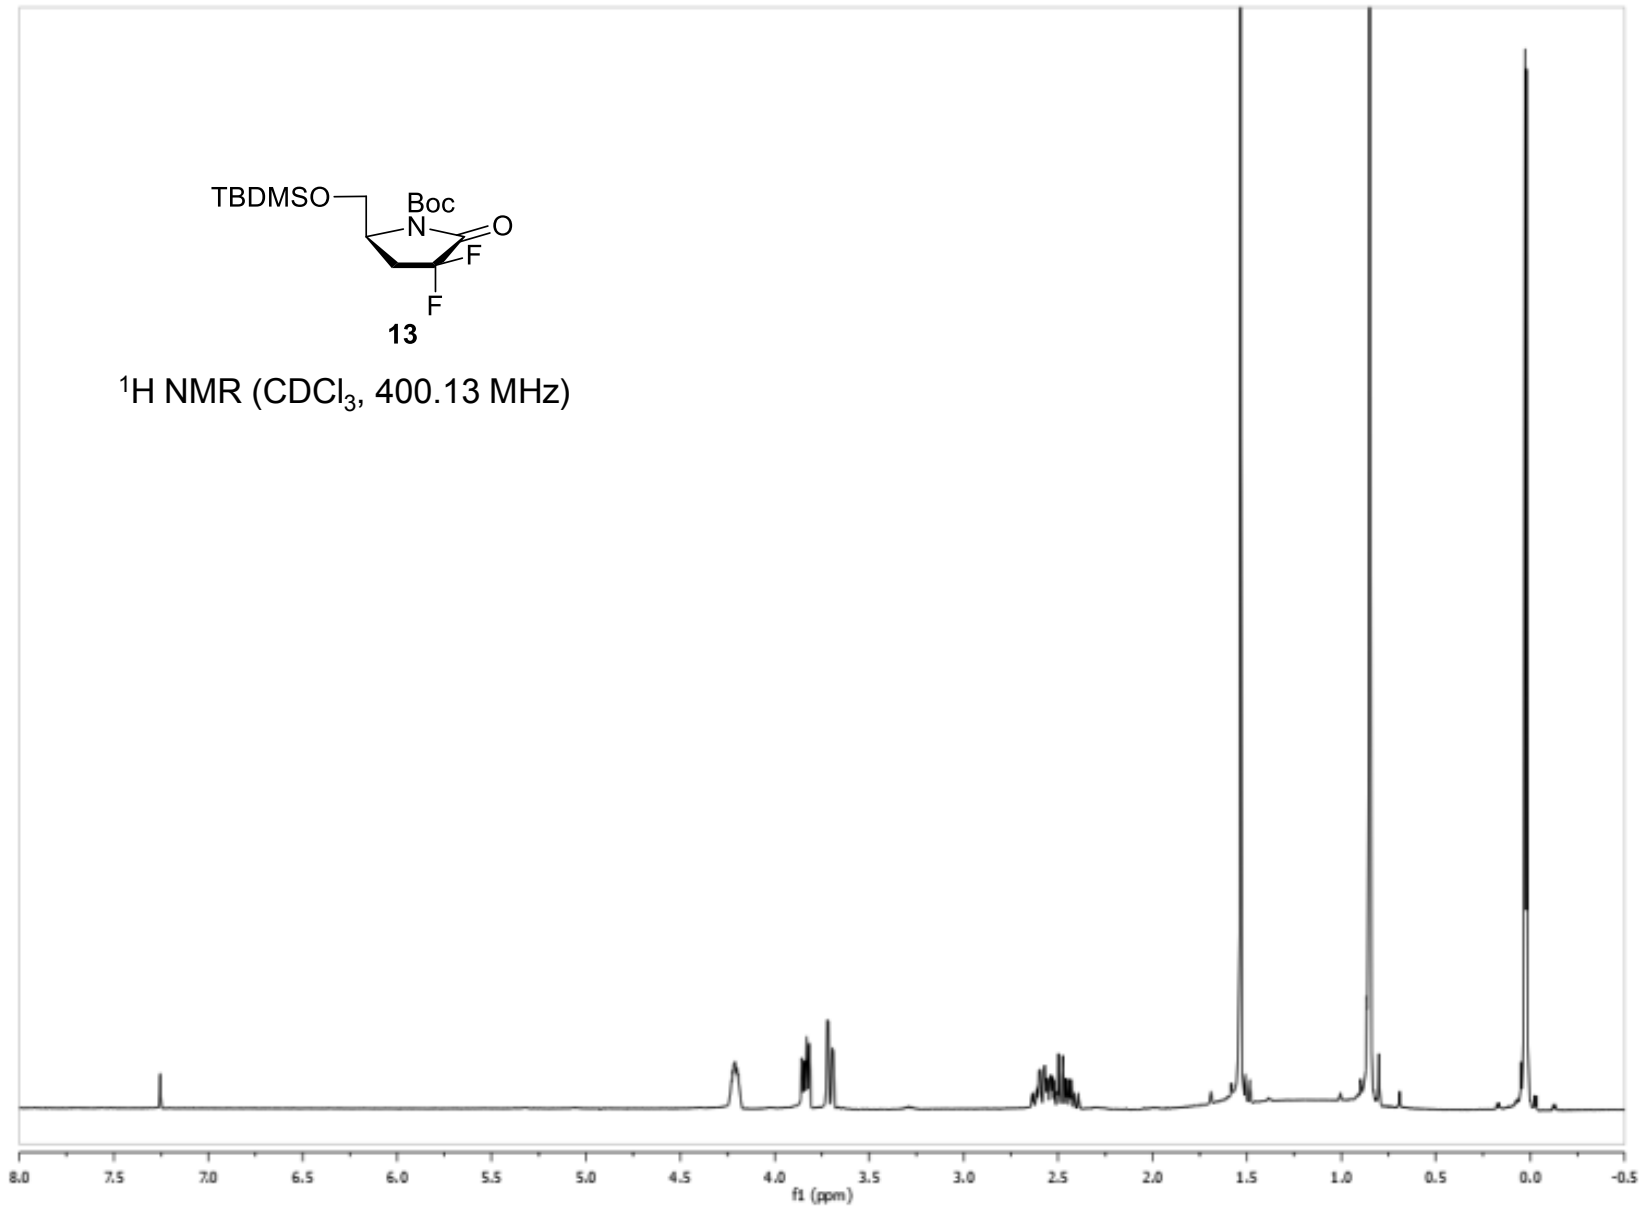

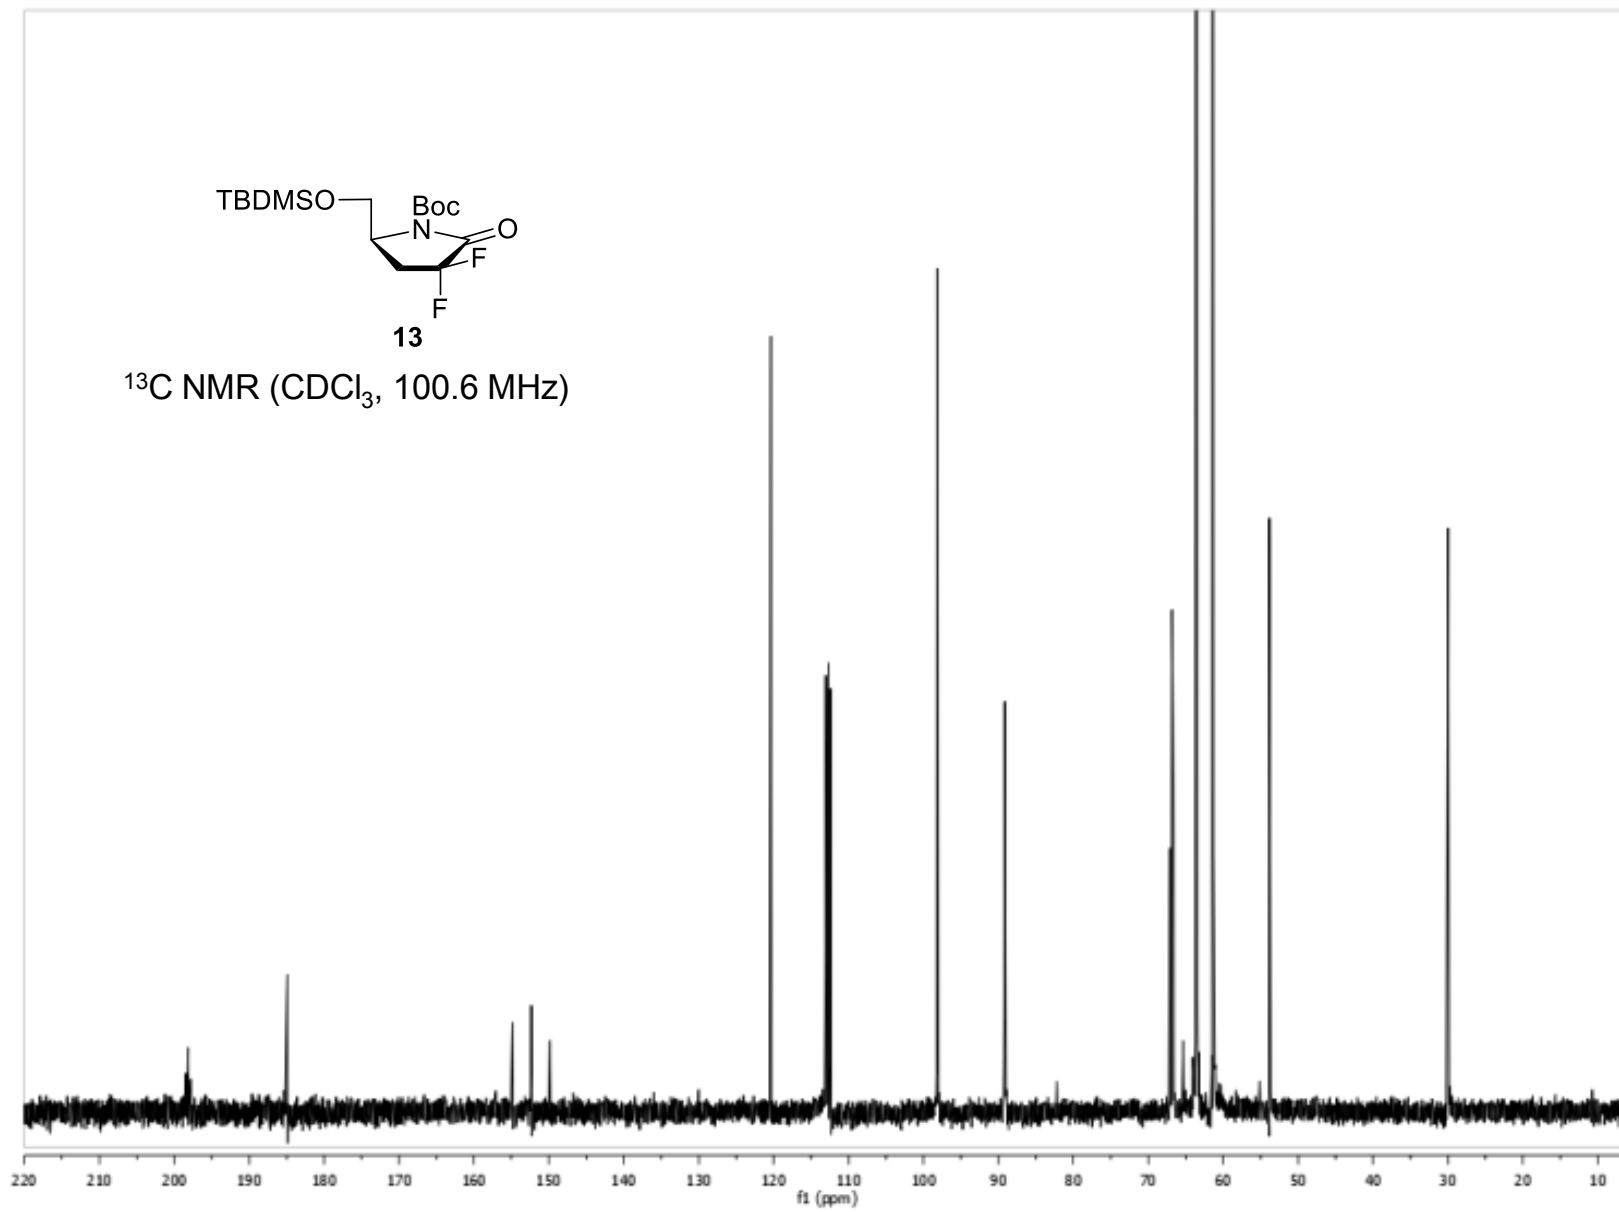

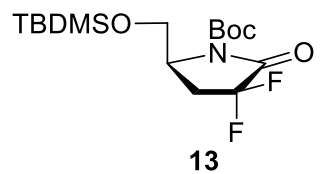

DEPT NMR (CDCl<sub>3</sub>, 100.6 MHz)

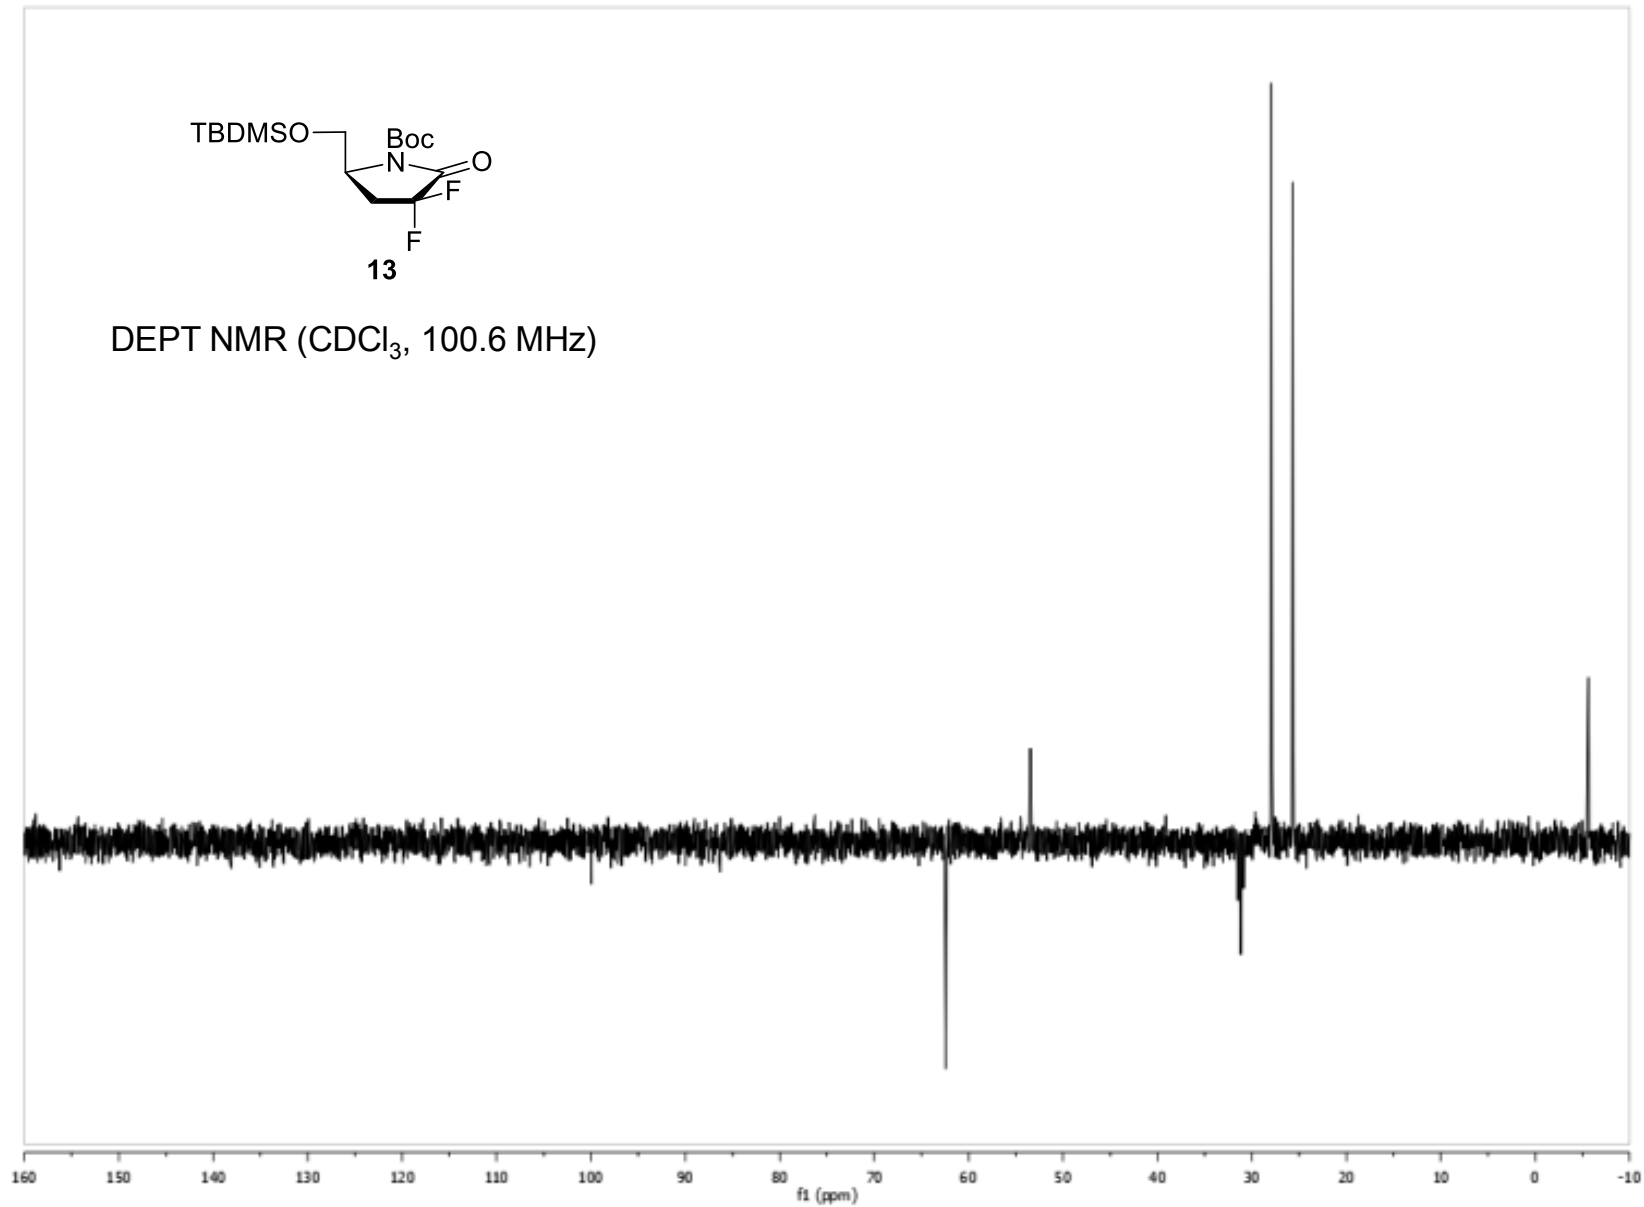



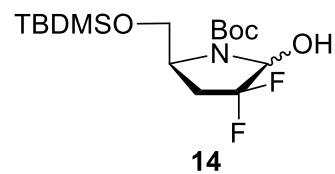

$^1\text{H}$  NMR ( $\text{CDCl}_3$ , 400.13 MHz)

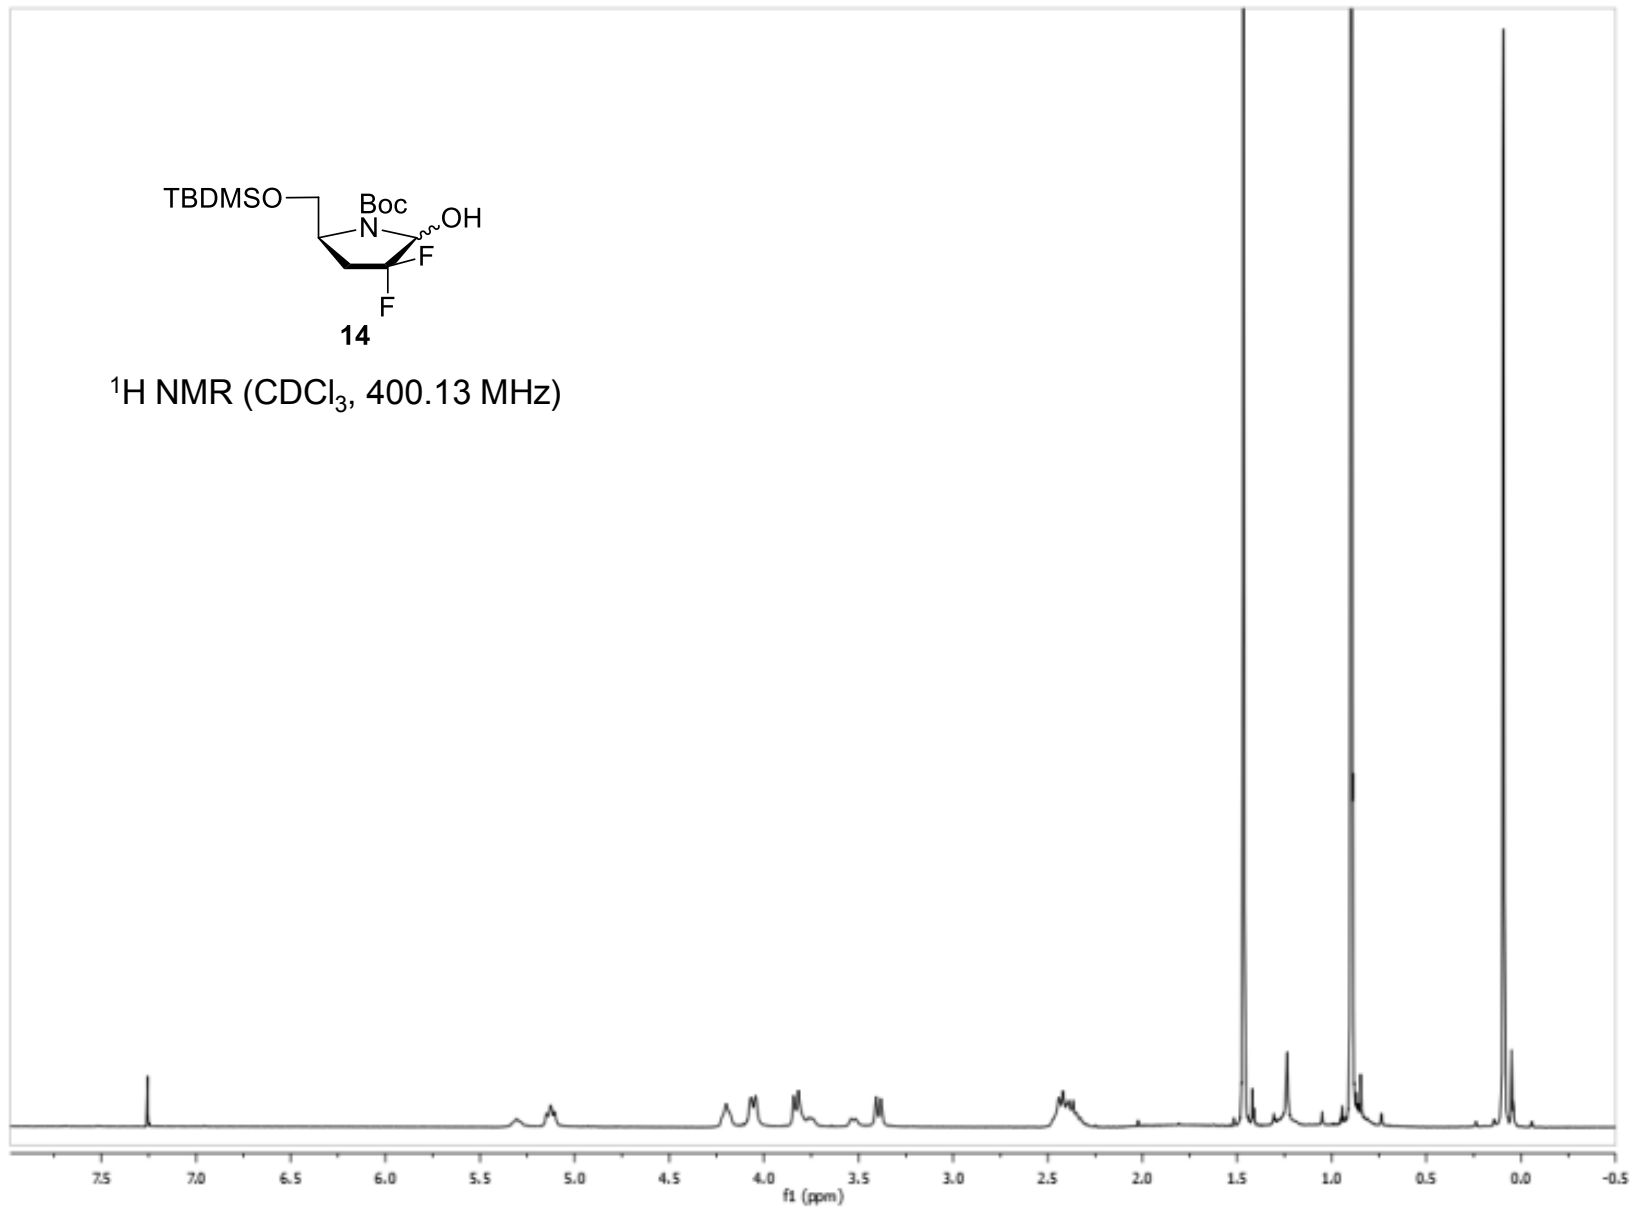

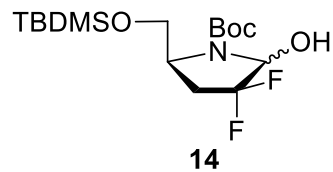

$^{13}\text{C}$  NMR ( $\text{CDCl}_3$ , 100.6 MHz)

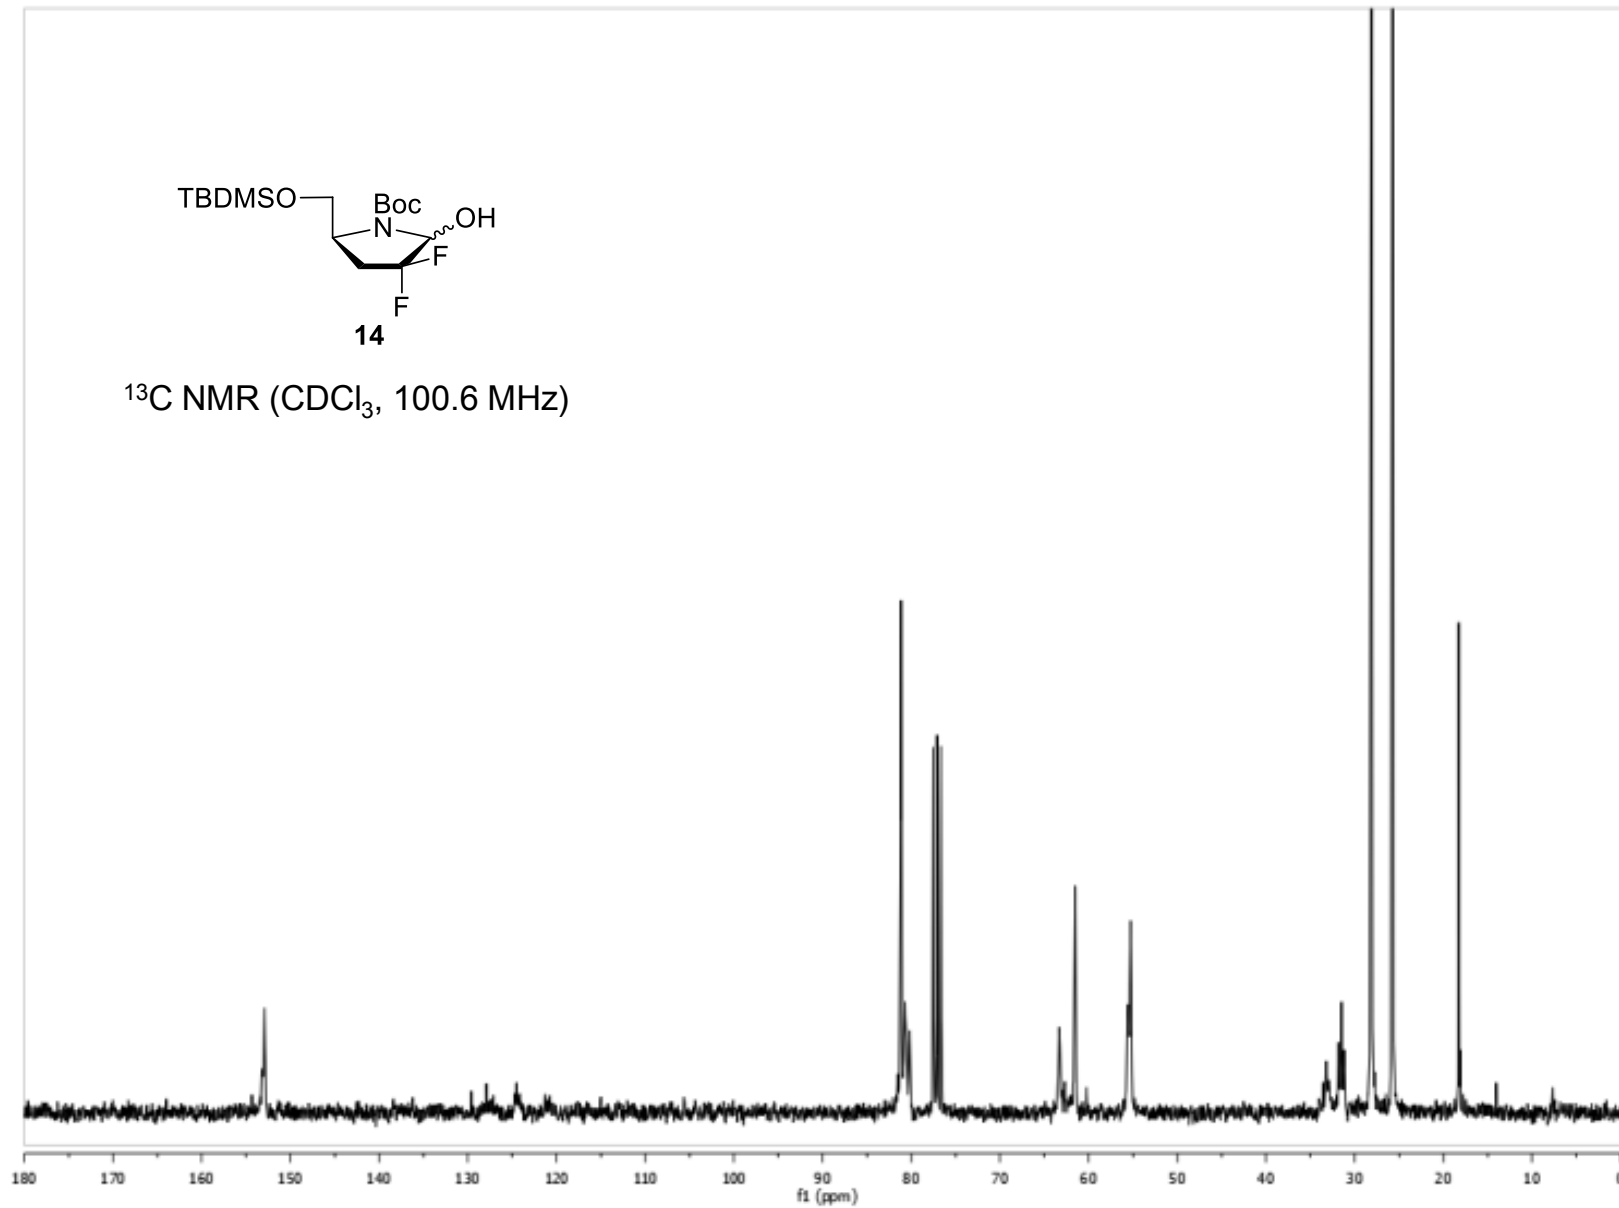



DEPT NMR (CDCl<sub>3</sub>, 100.6 MHz)

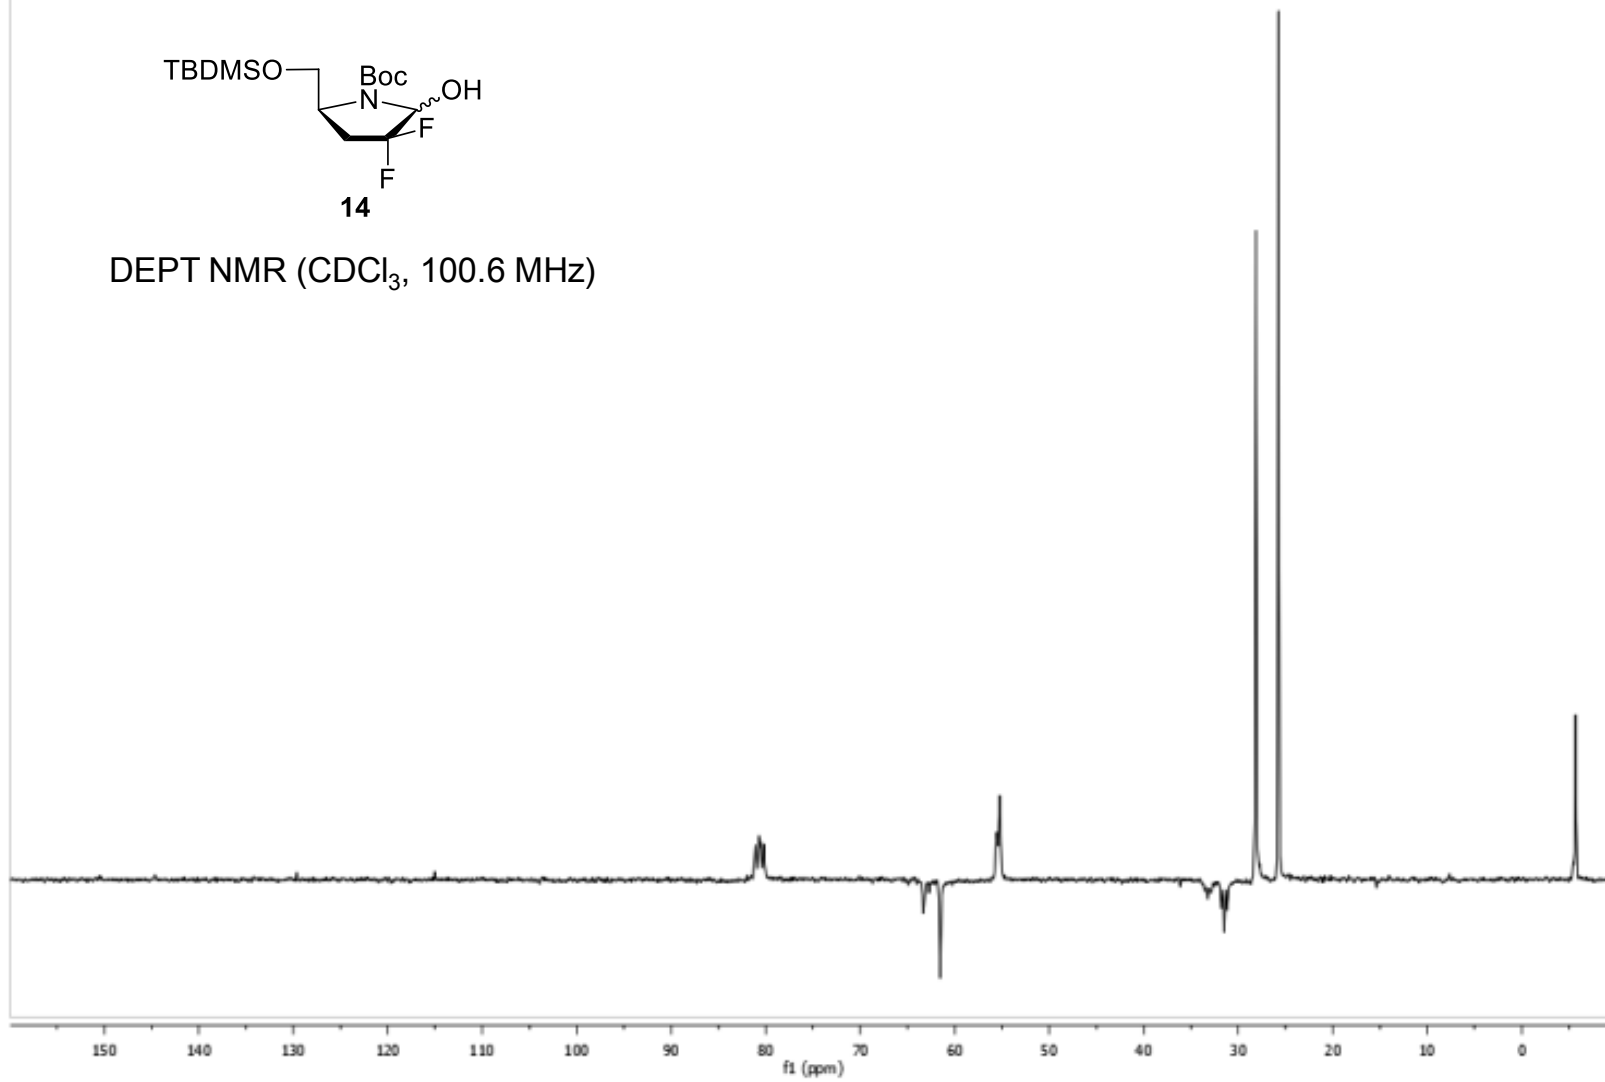

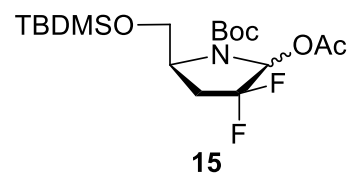

$^1\text{H}$  NMR (acetone- $d_6$ , 400.13 MHz)

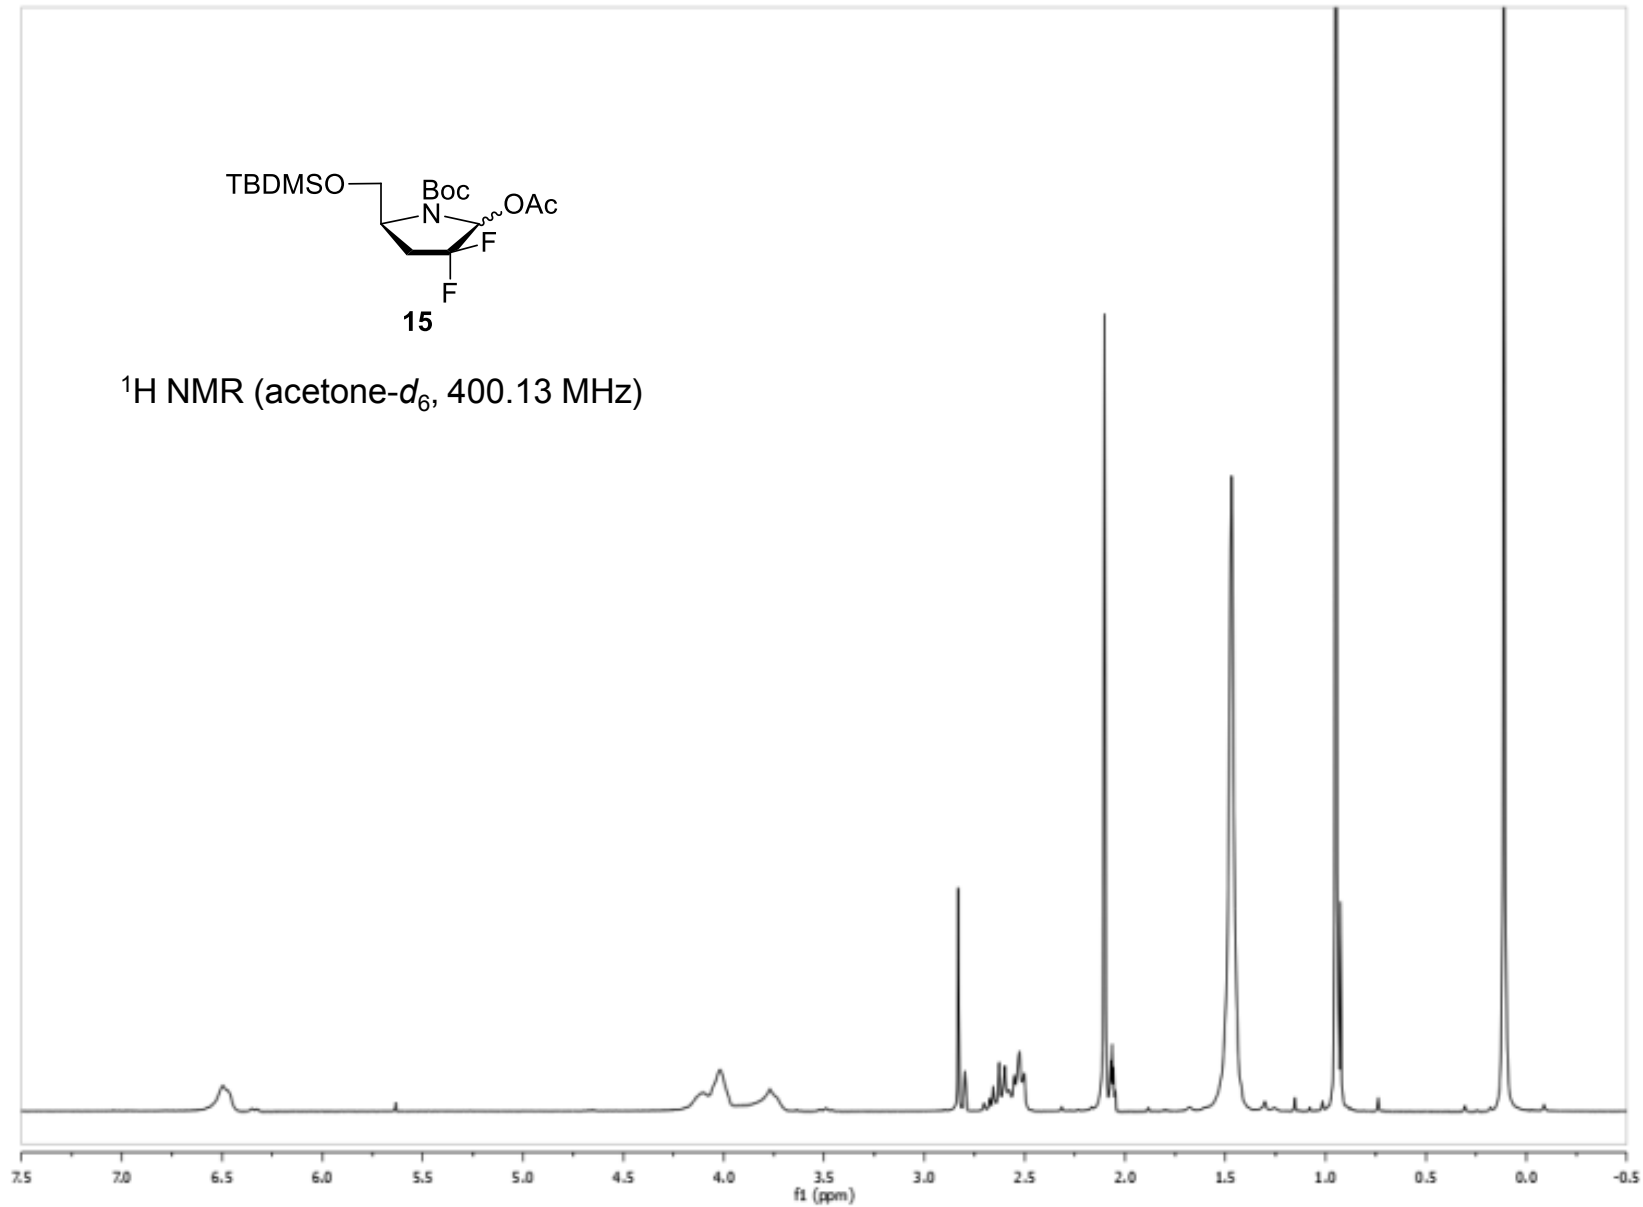



$^{13}\text{C}$  NMR ( $\text{CDCl}_3$ , 100.6 MHz)

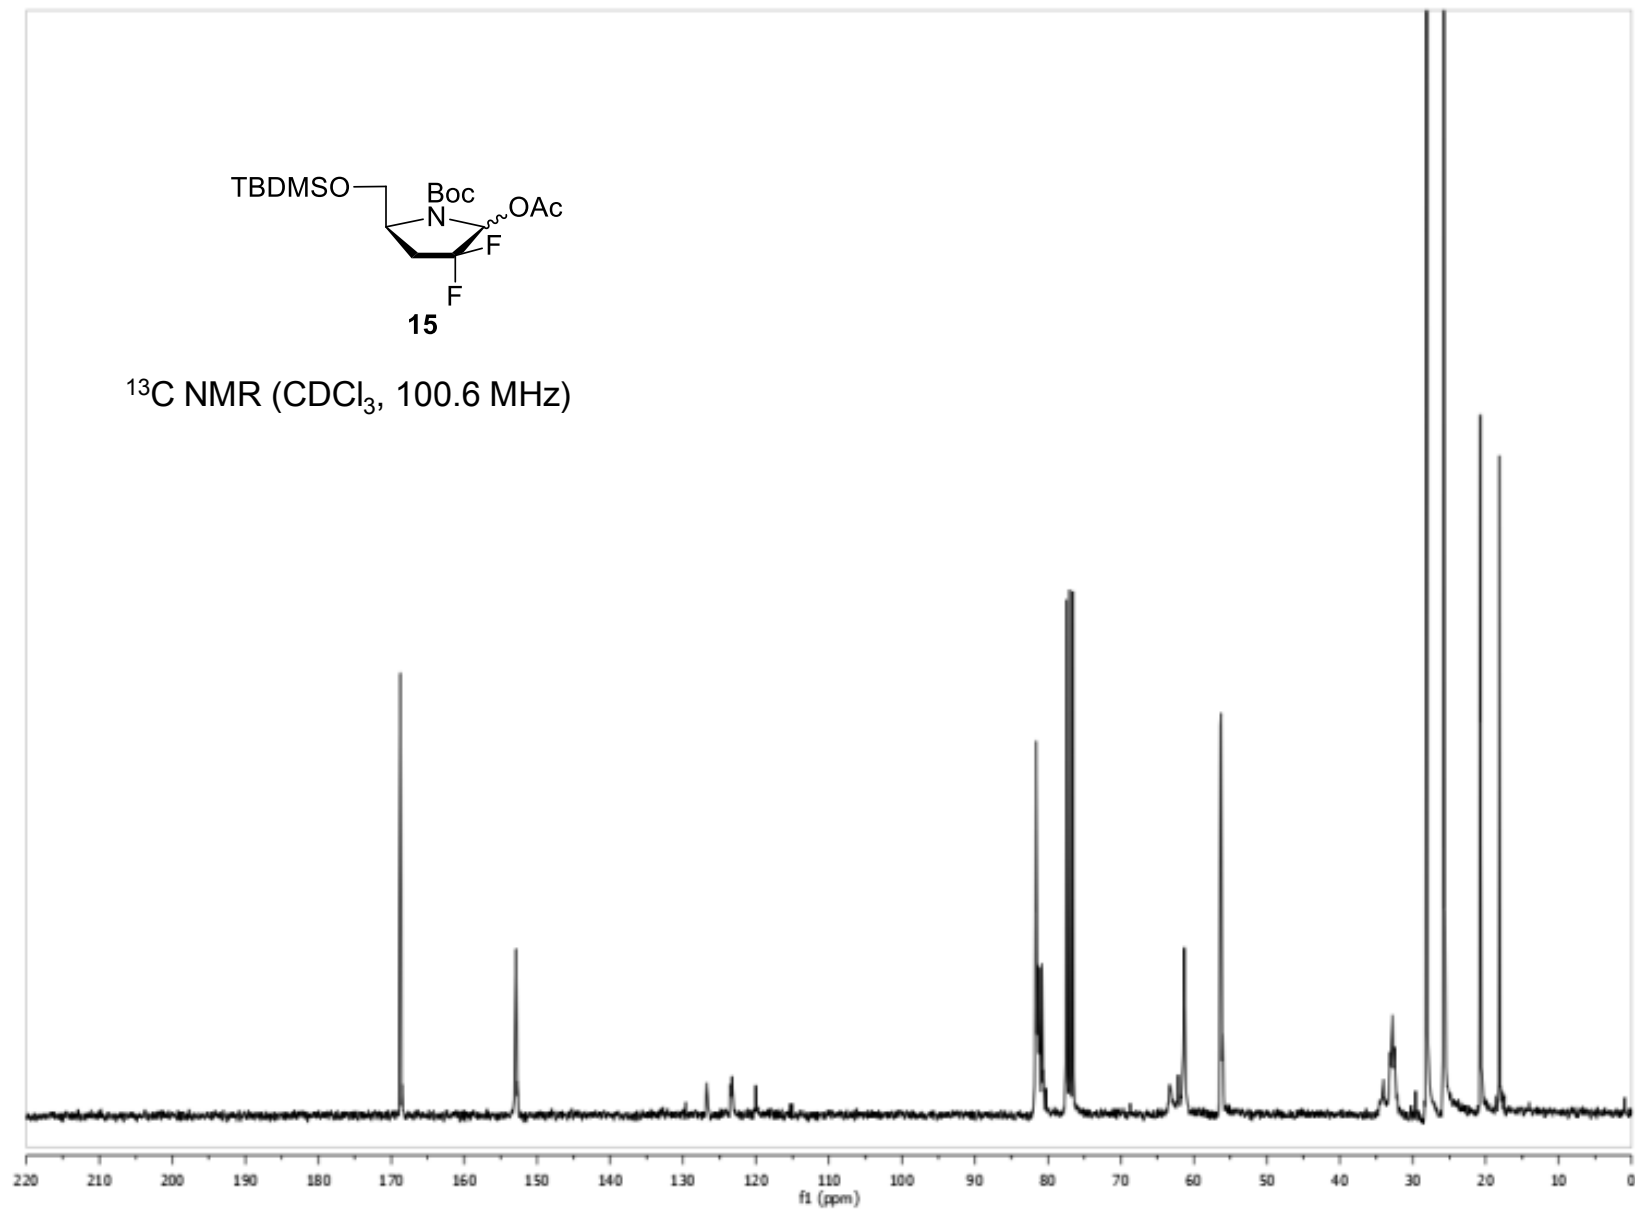

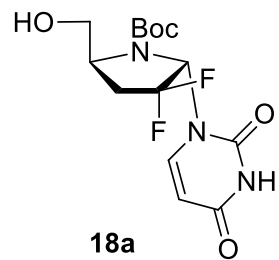

$^1\text{H}$  NMR ( $\text{CDCl}_3$ , 600.15 MHz)

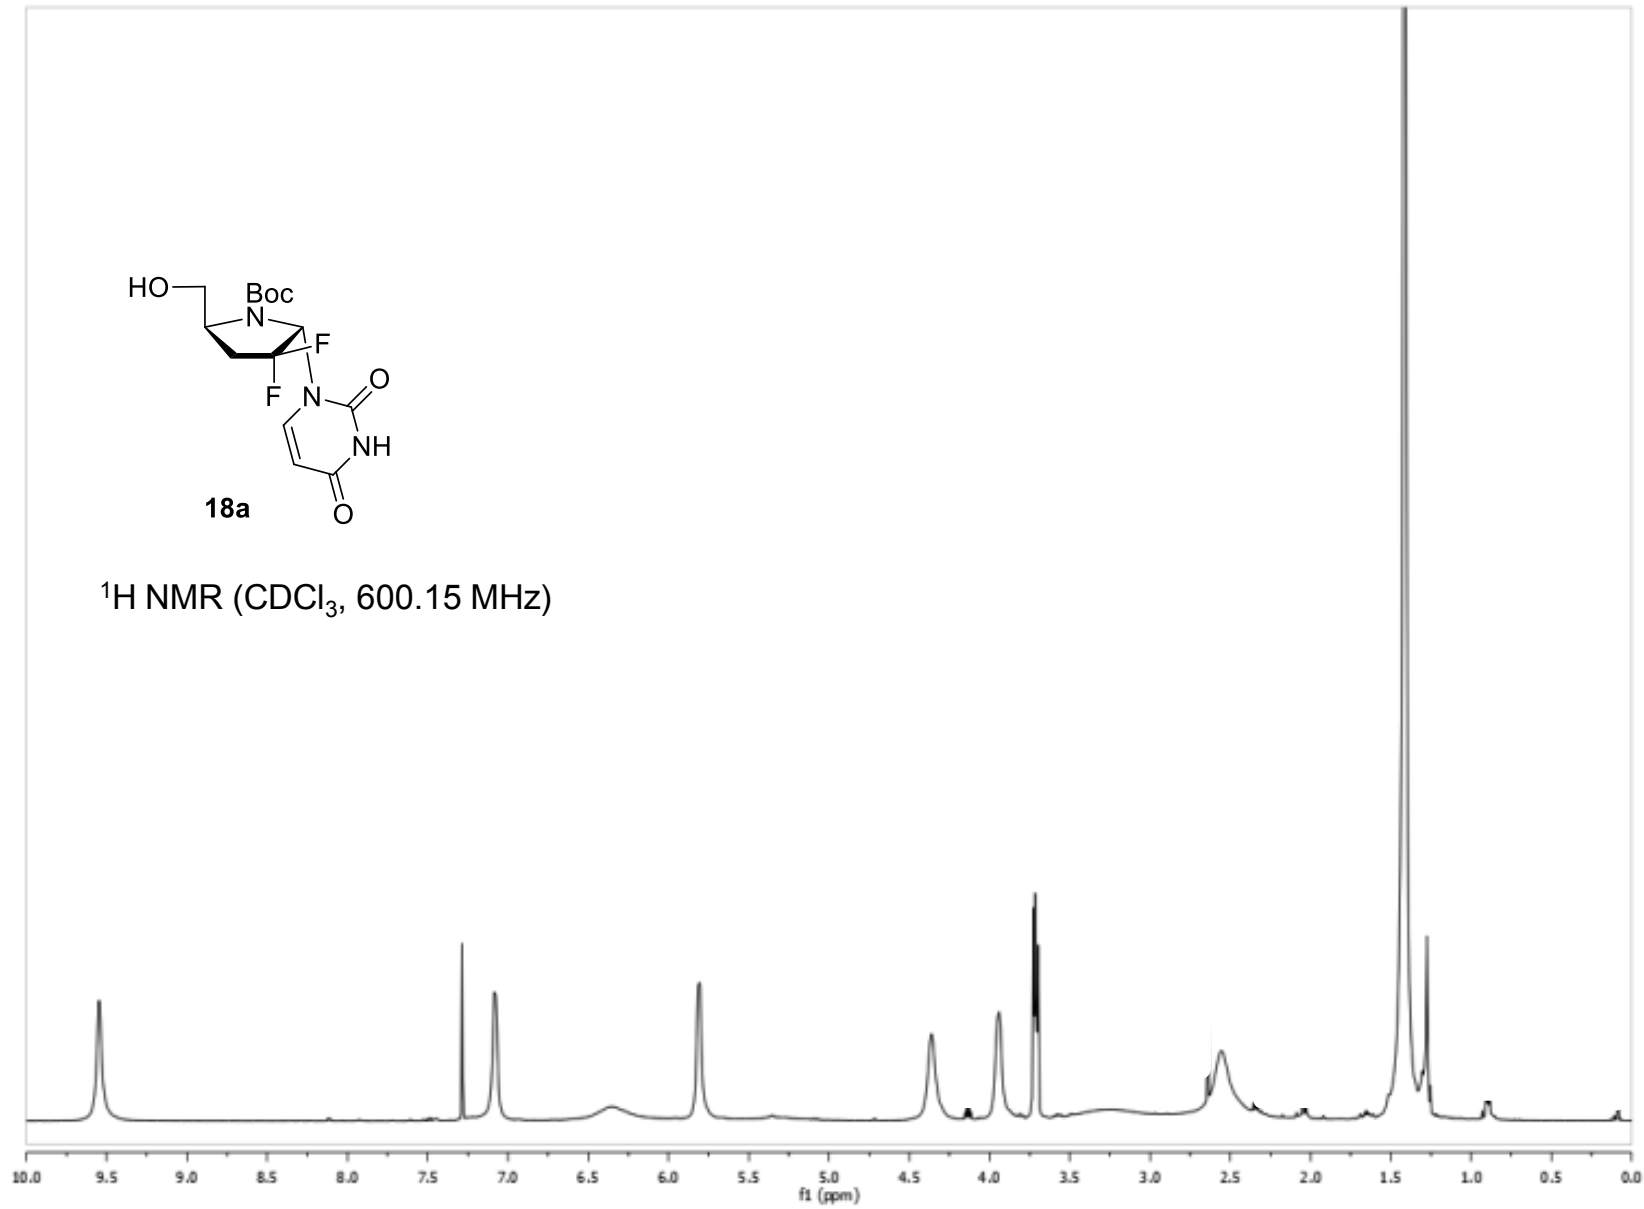

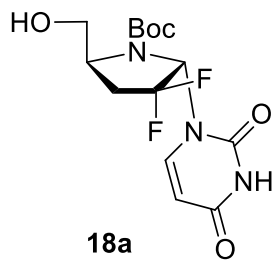

$^{13}\text{C}$  NMR ( $\text{CDCl}_3$ , 600.15 MHz)

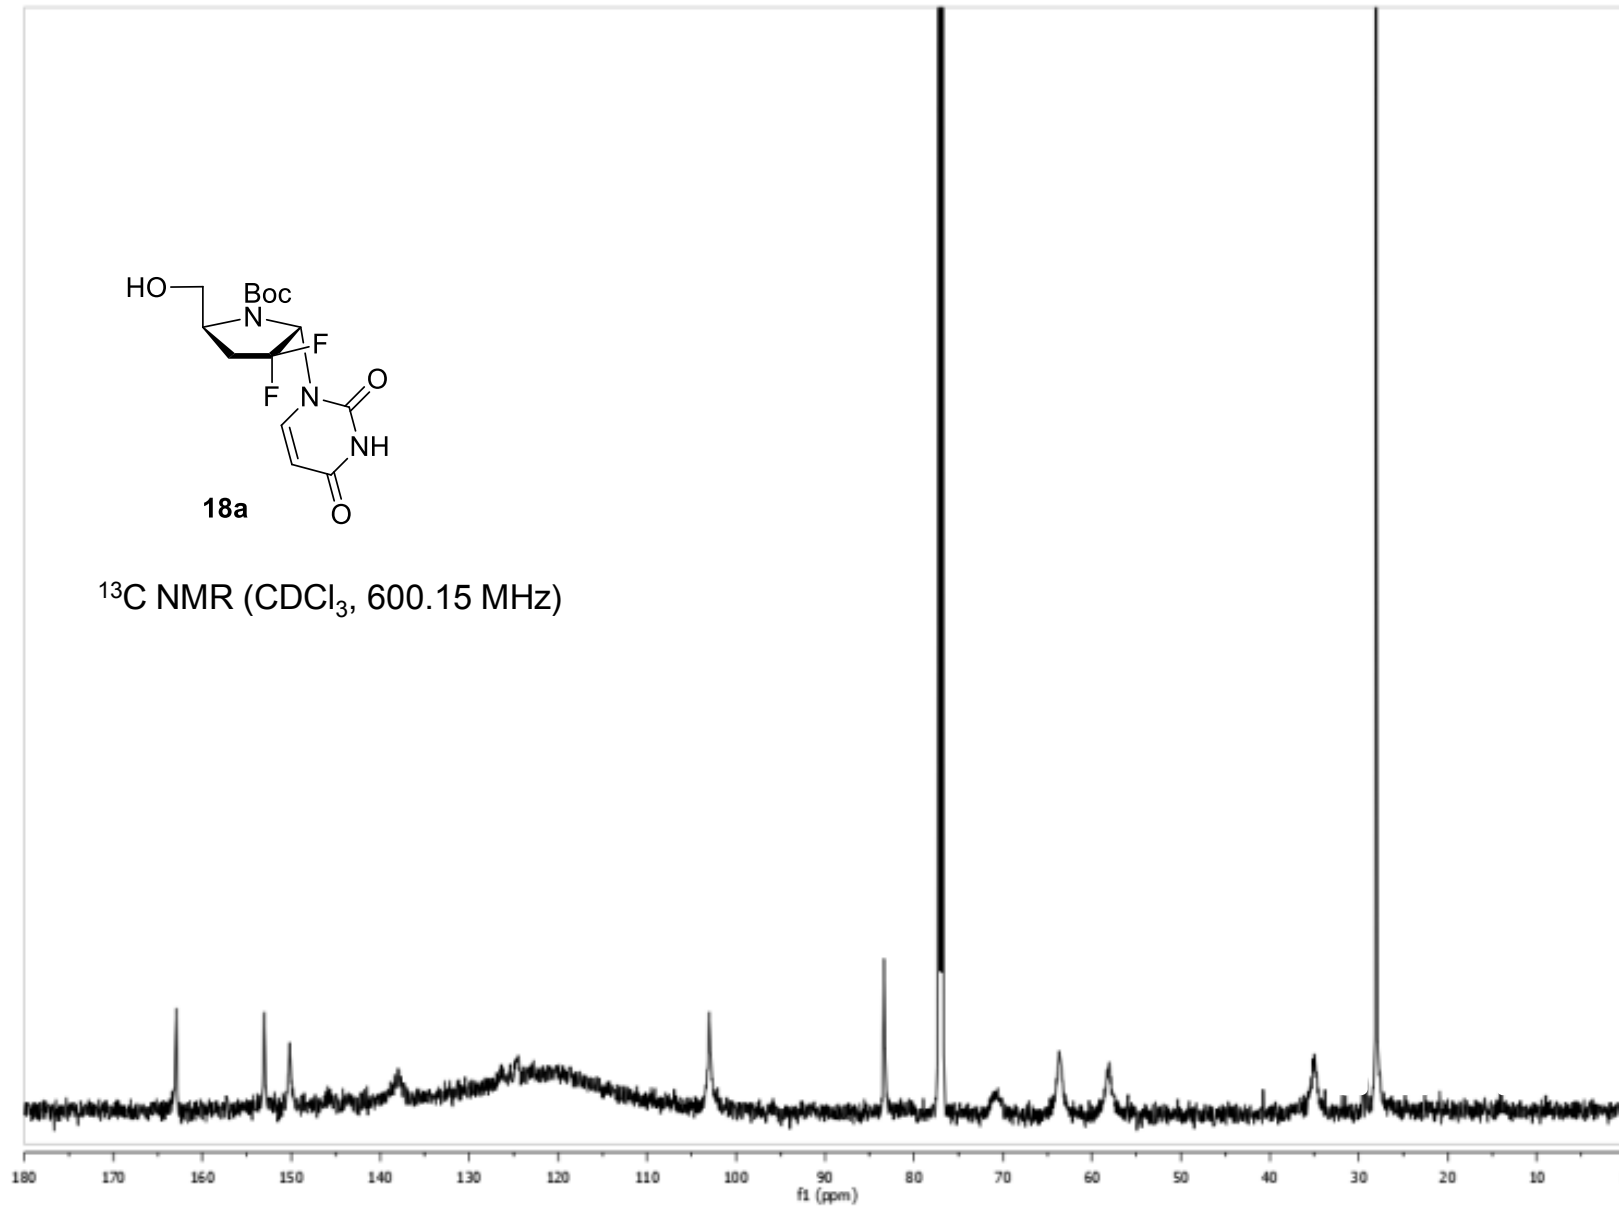

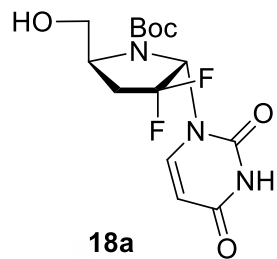

COSY (CDCl<sub>3</sub>, 600.15 MHz)

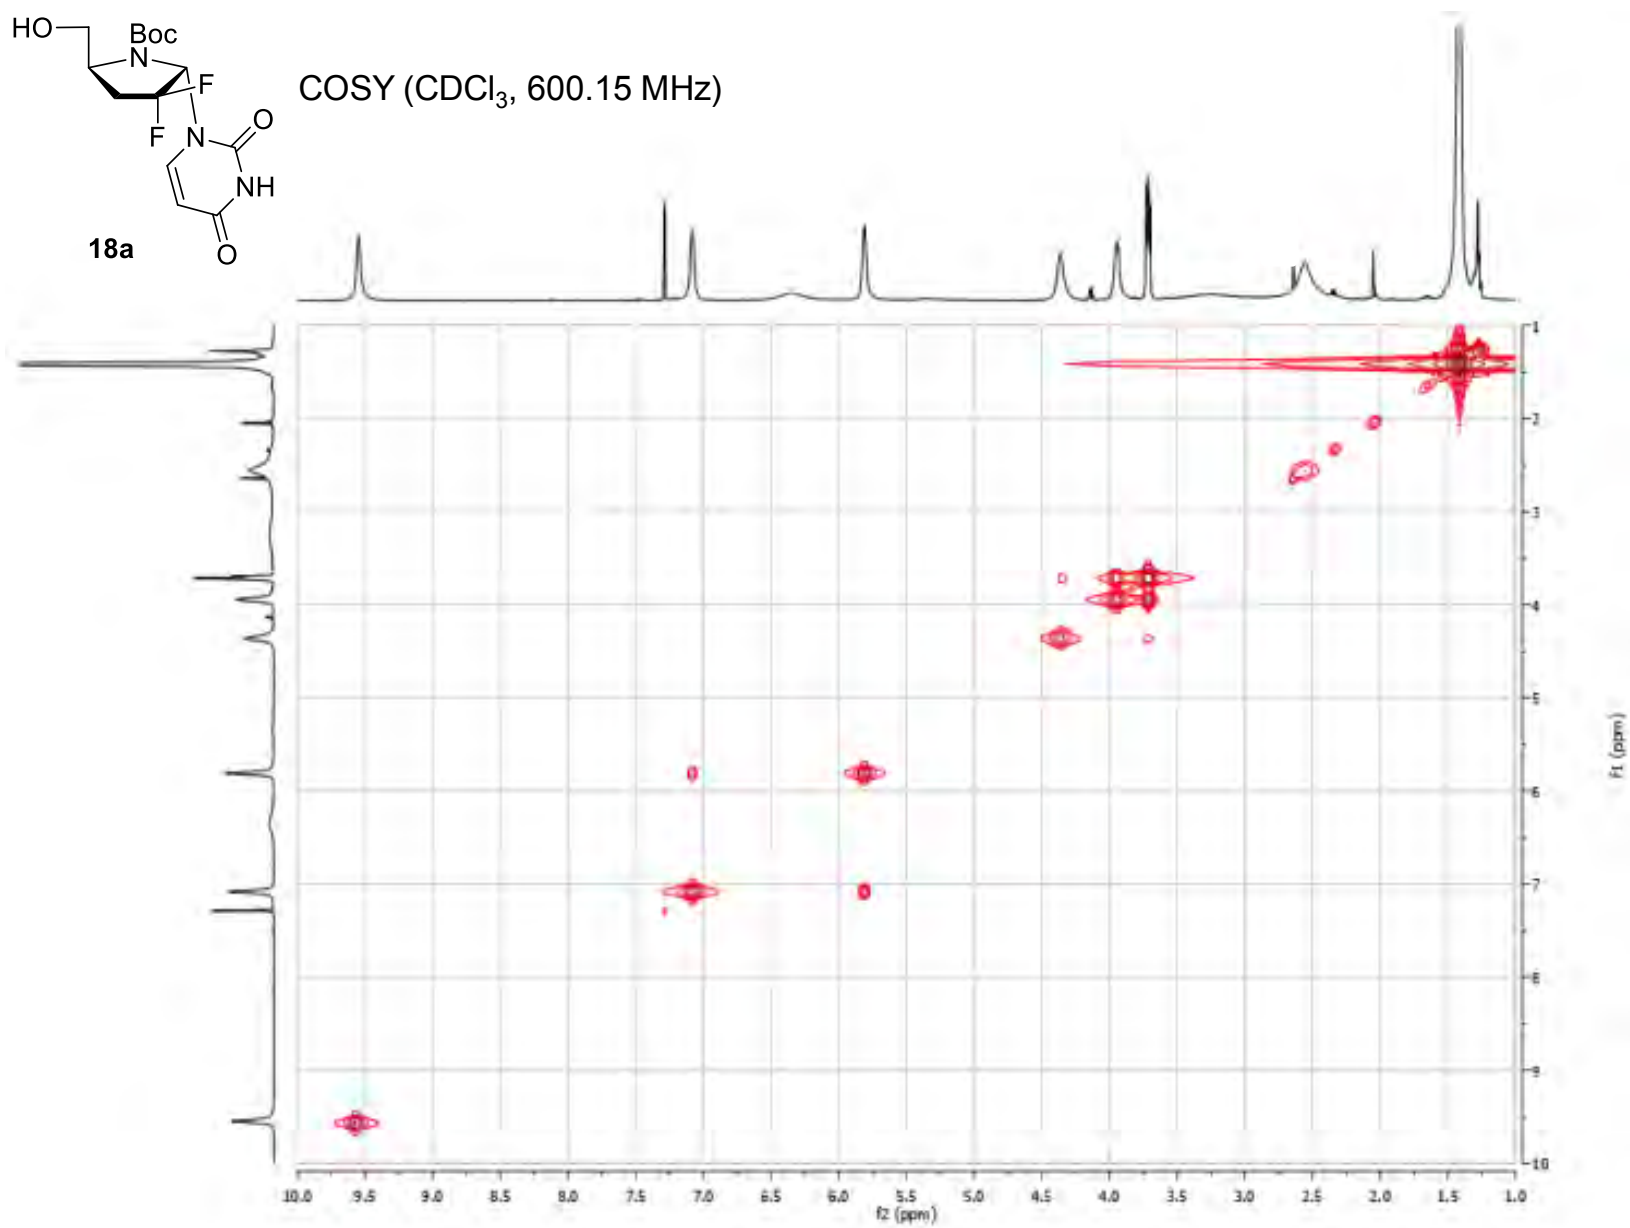



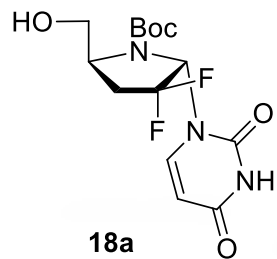

HSQC (CDCl<sub>3</sub>, 600.15 MHz)

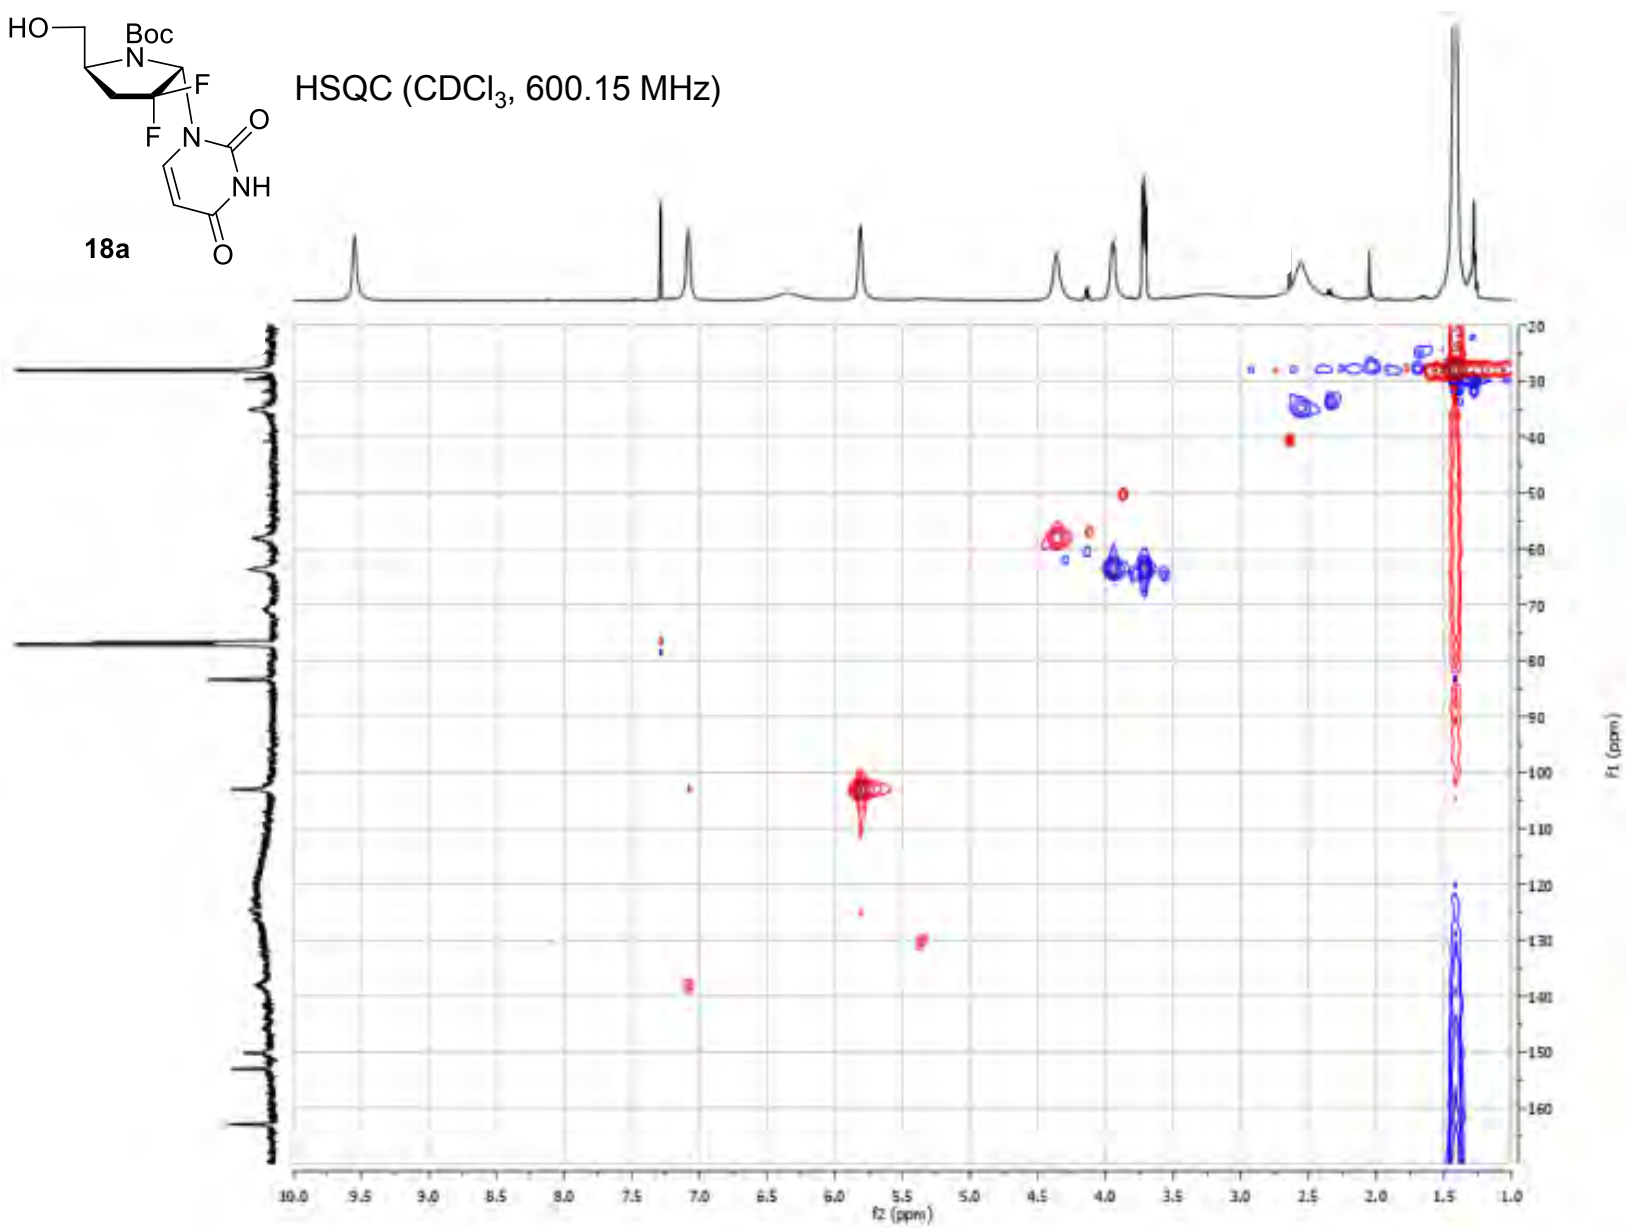

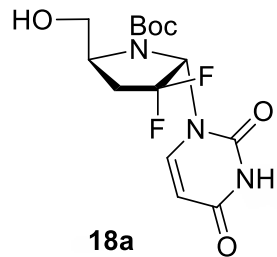

NOESY (CDCl<sub>3</sub>, 600.15 MHz)

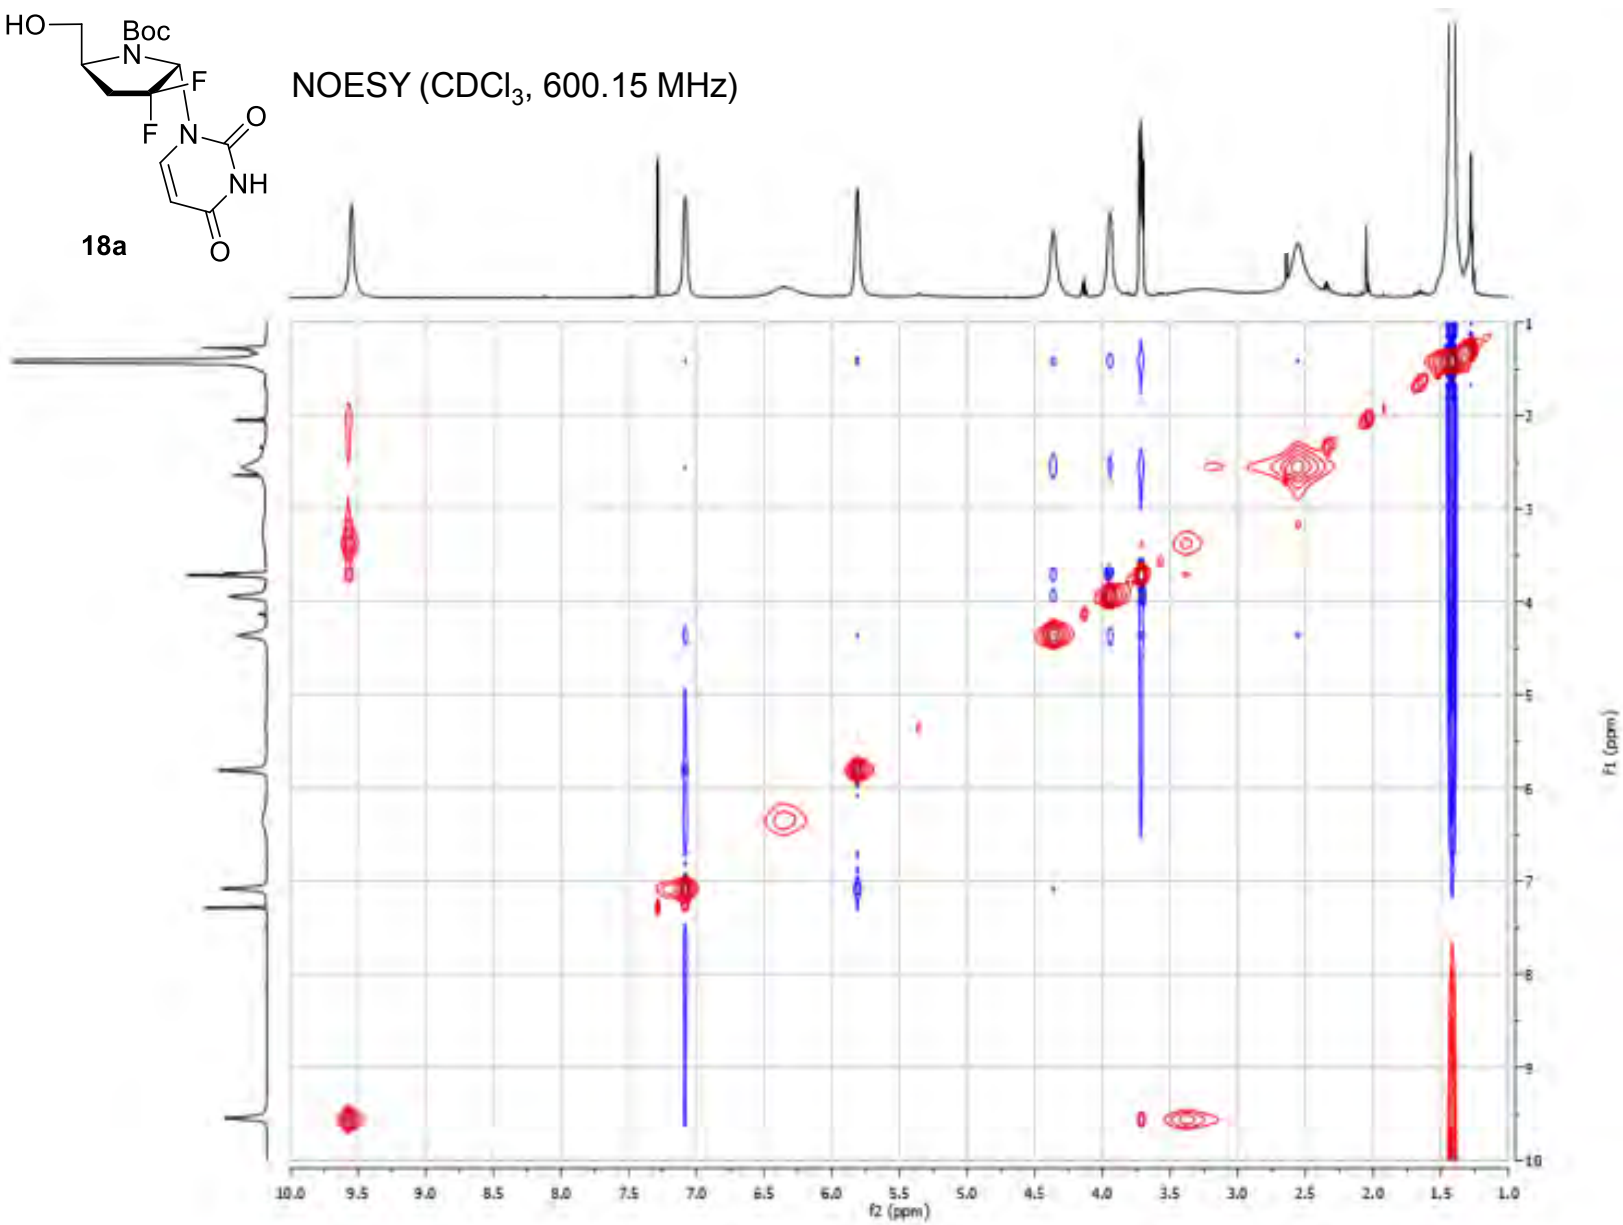

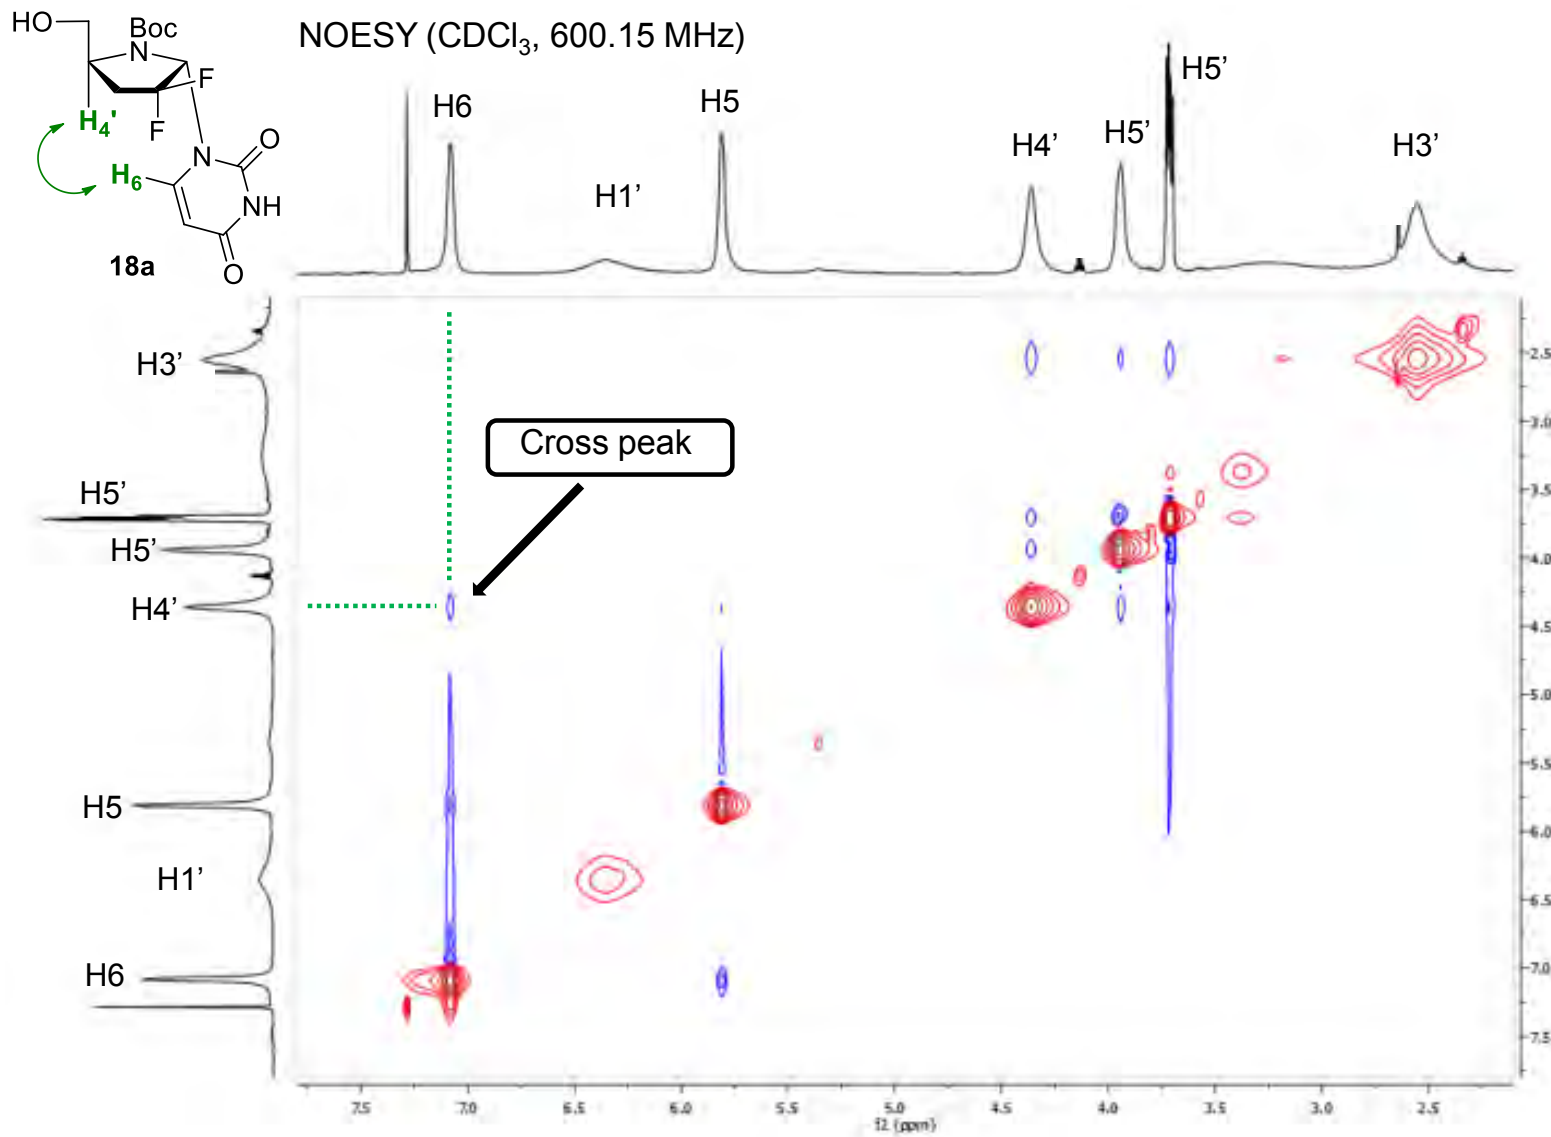

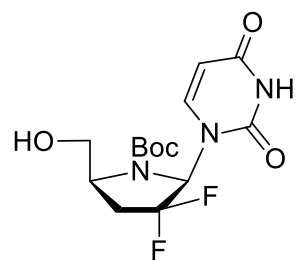

**19a**

$^1\text{H}$  NMR (acetone- $d_6$ , 300.13 MHz)

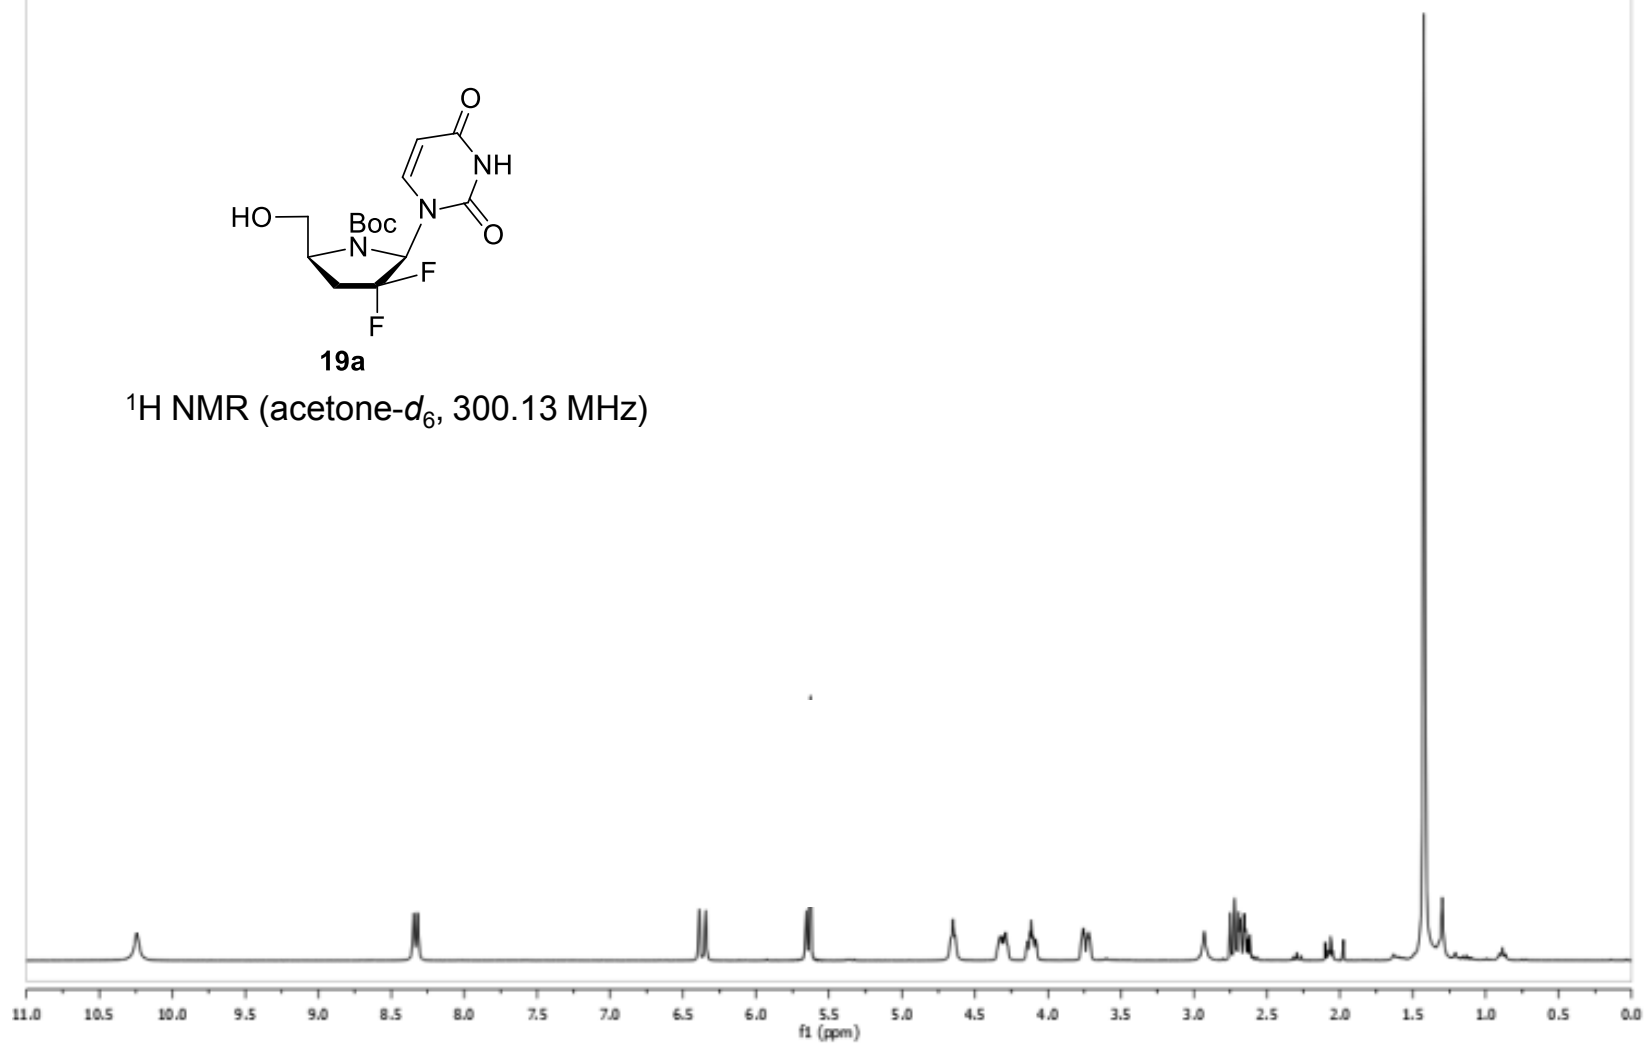

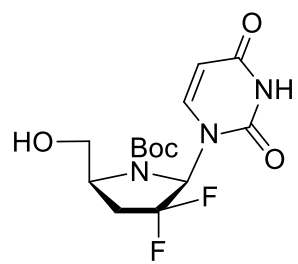

19a

$^{13}\text{C}$  NMR (acetone- $d_6$ , 75.5 MHz)

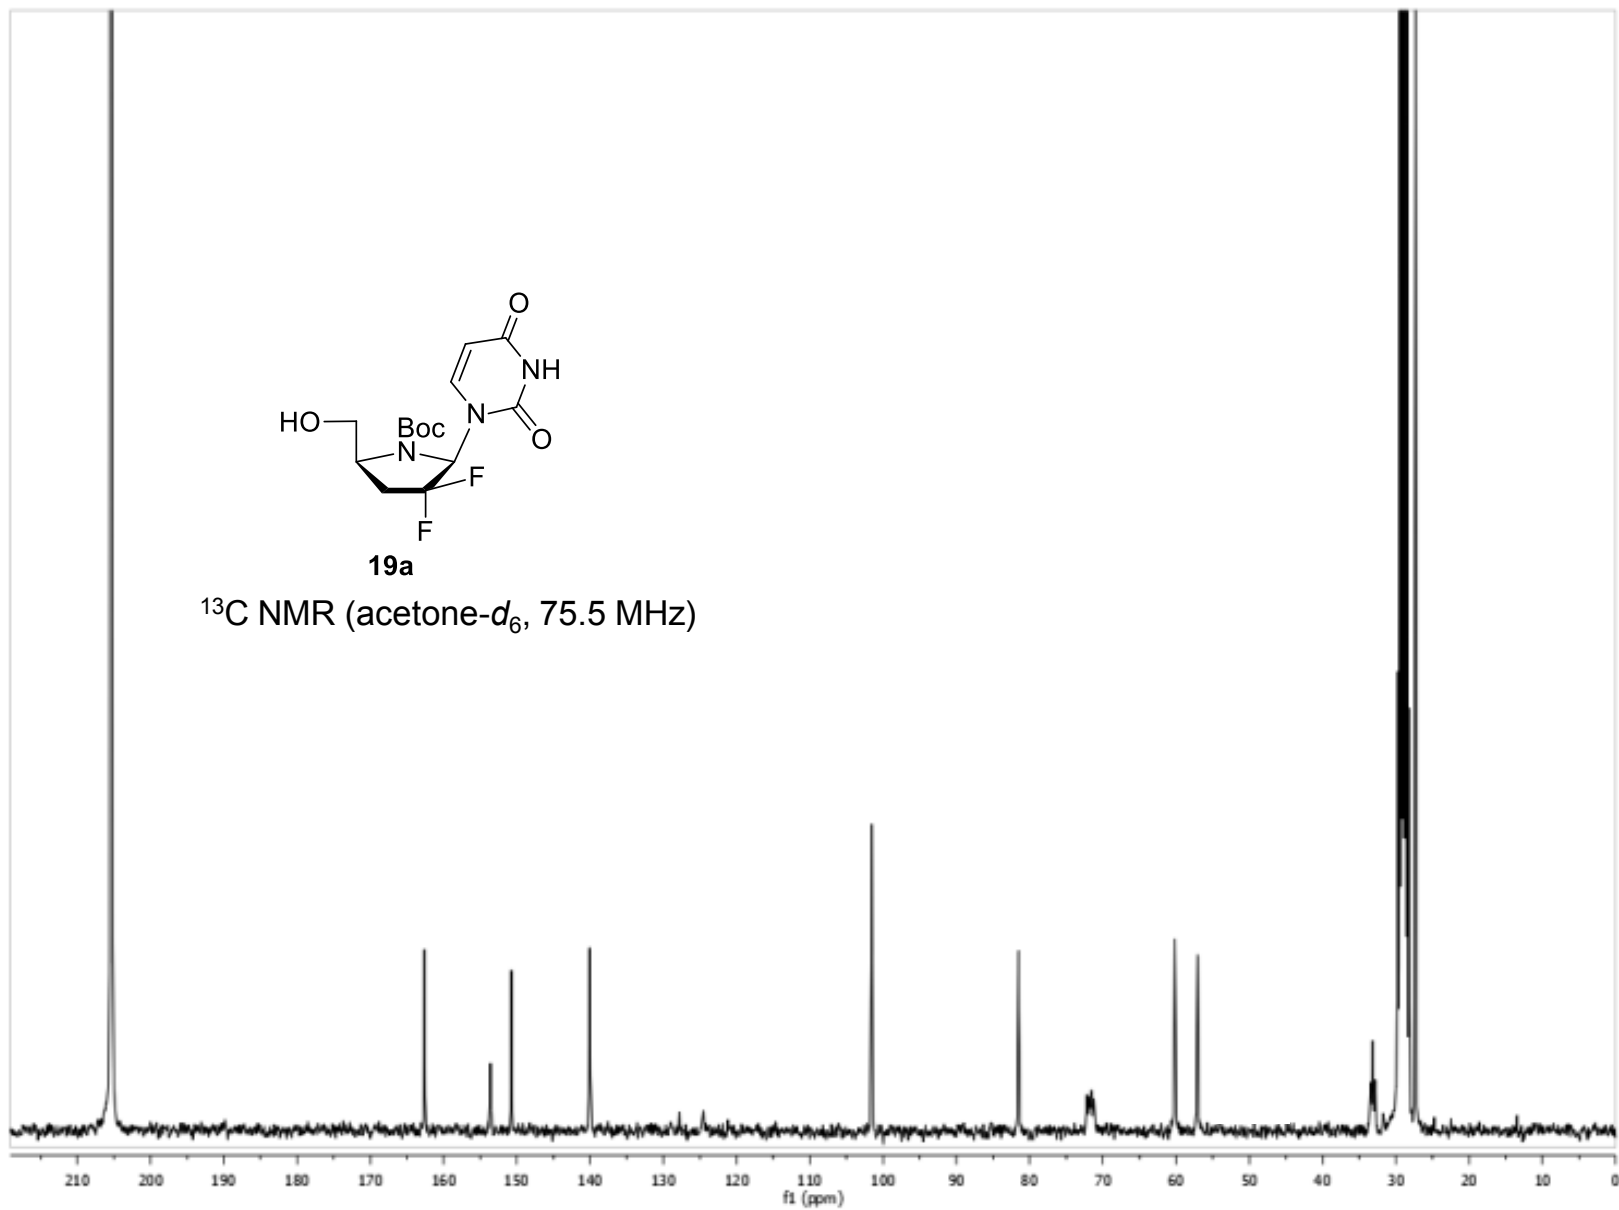

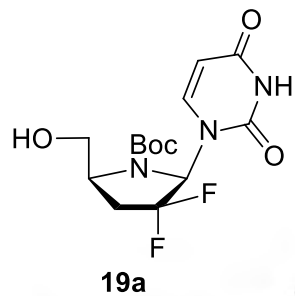

COSY (acetone- $d_6$ , 300.13 MHz)

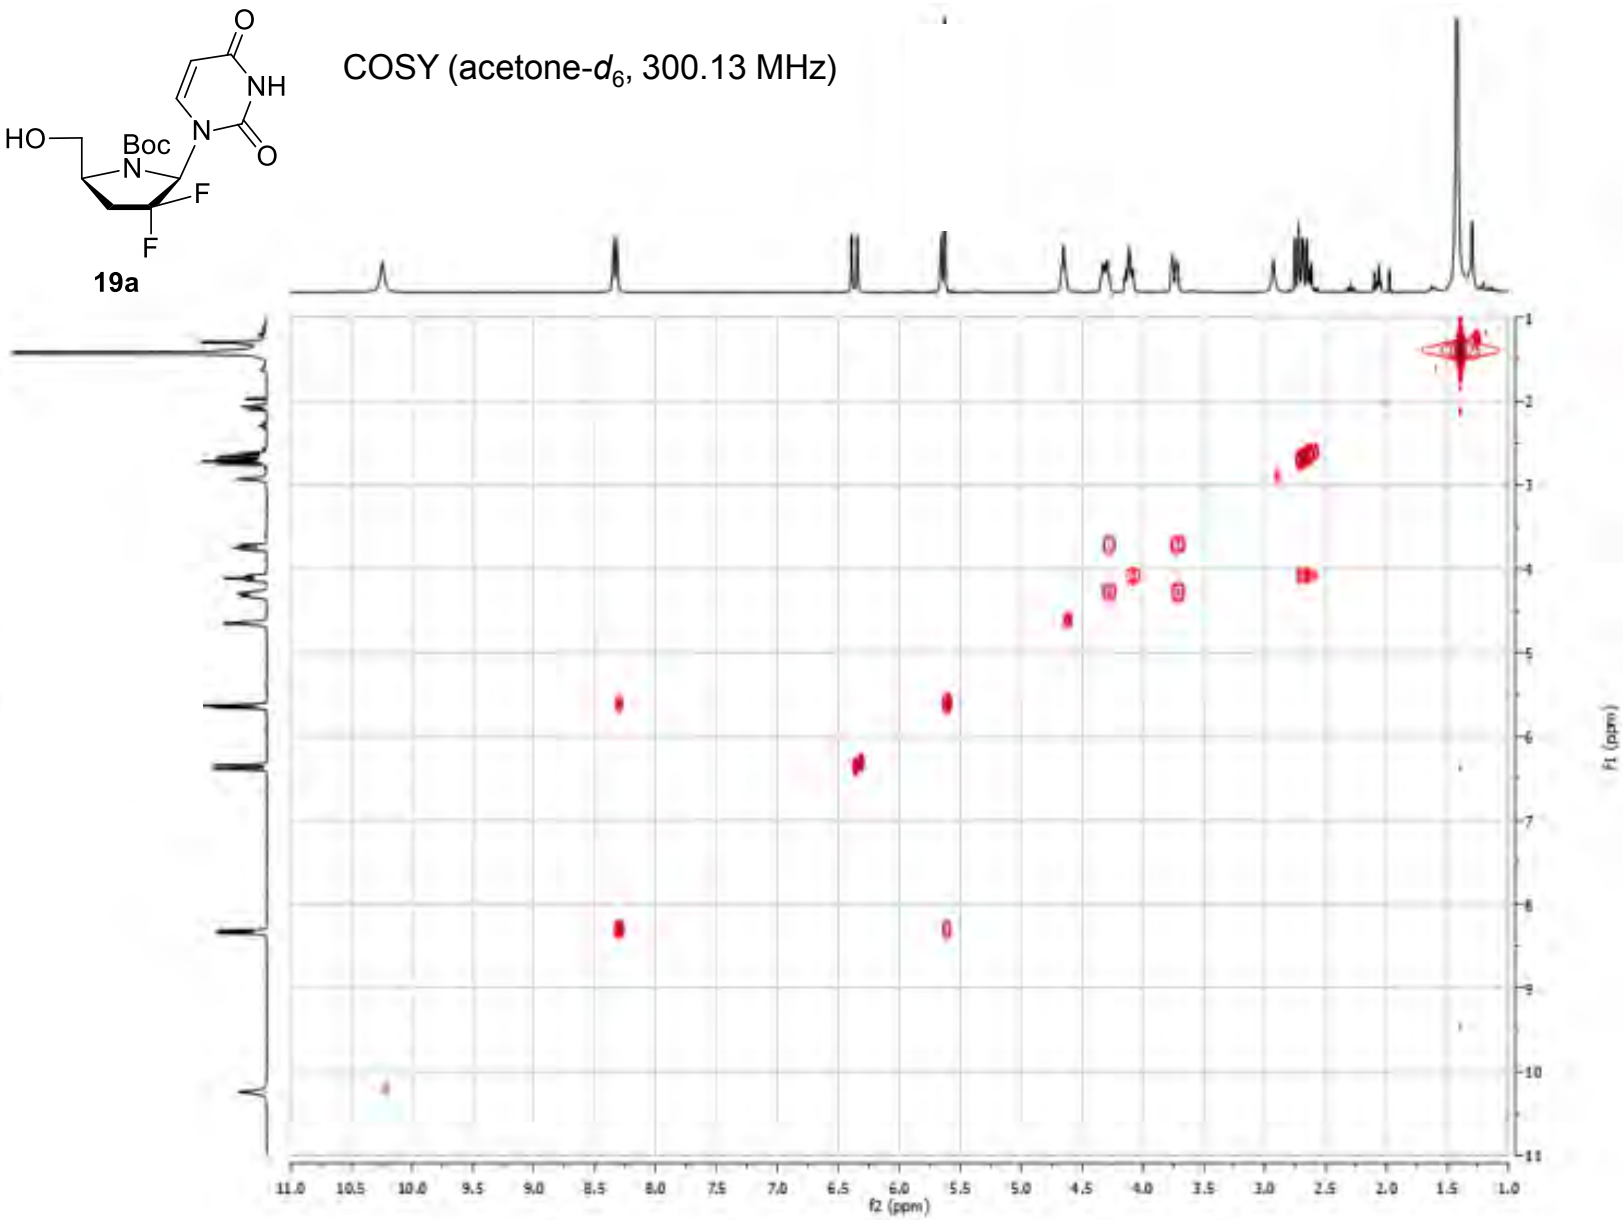

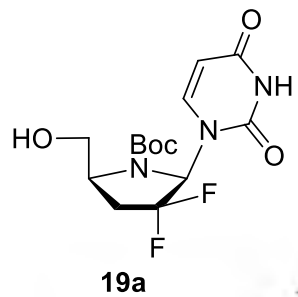

HSQC (acetone- $d_6$ , 300.13 MHz)

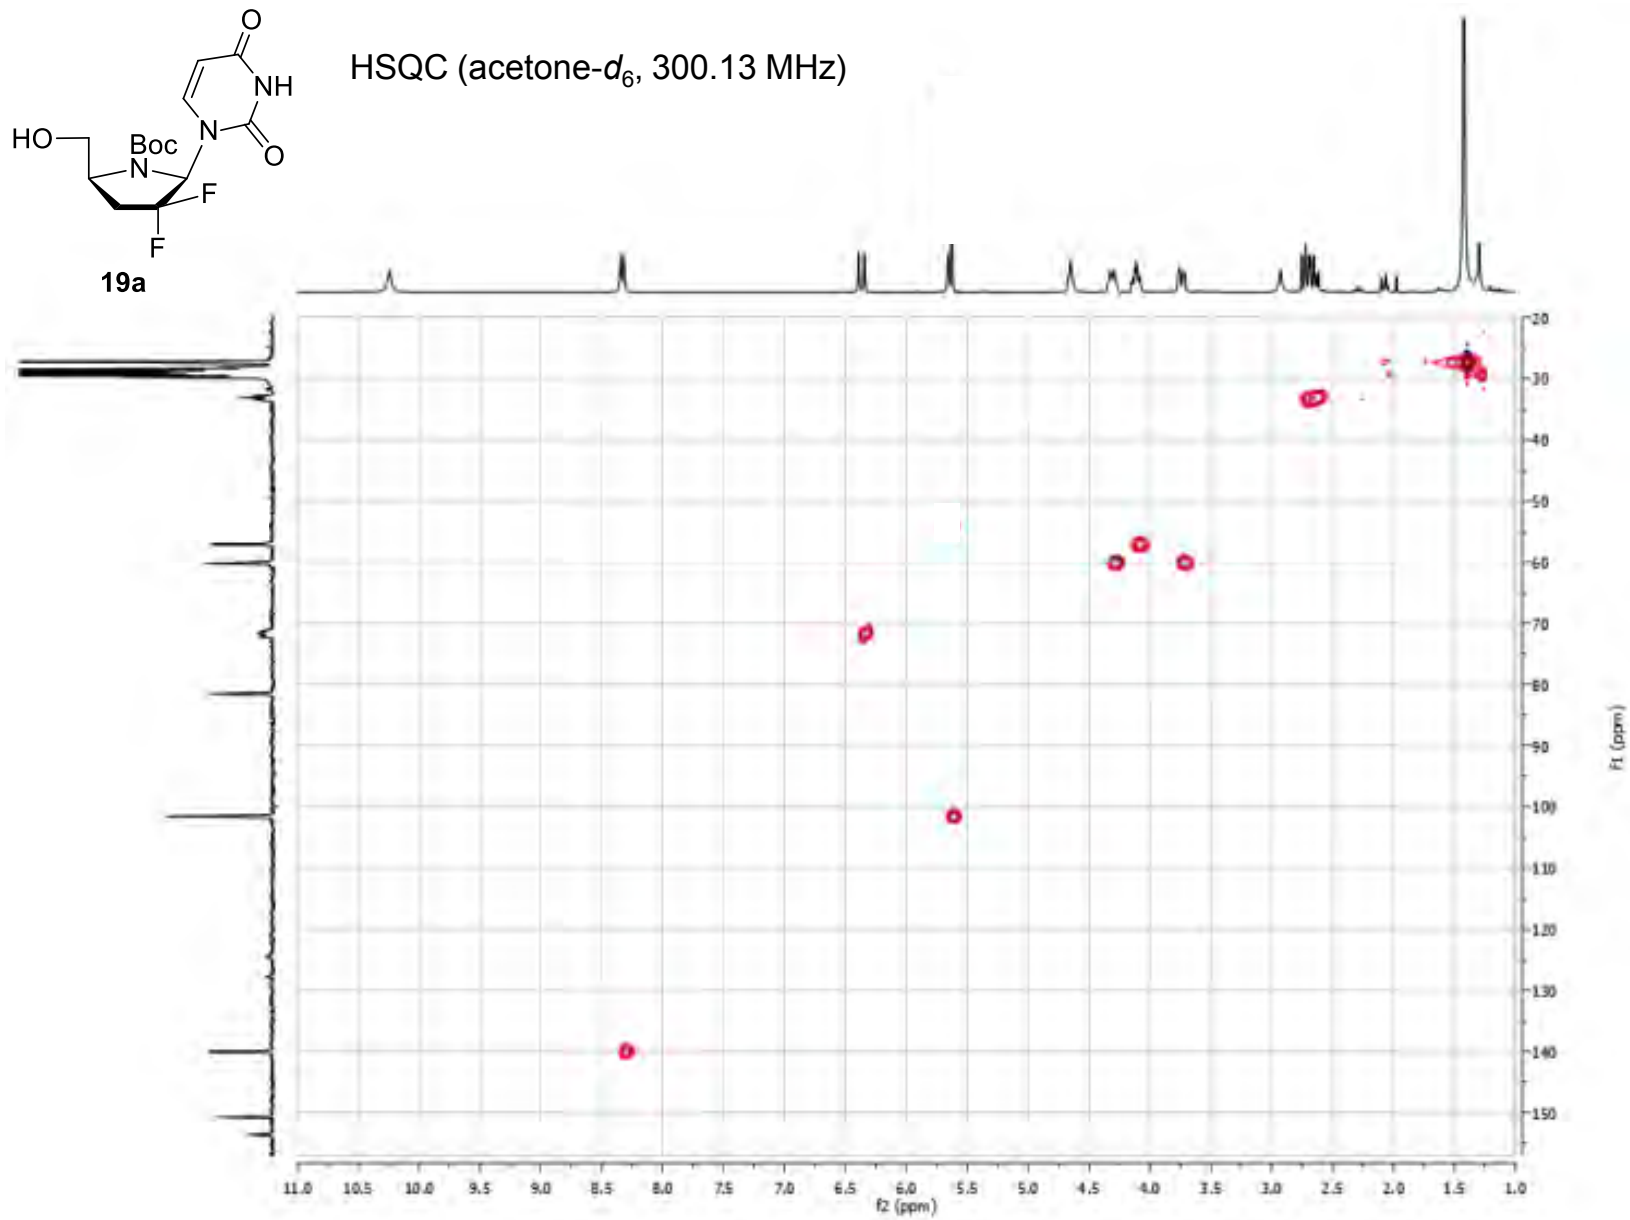

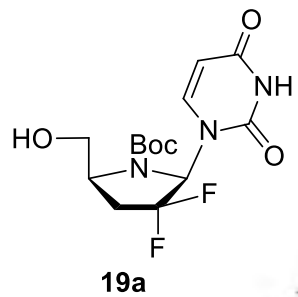

HMBC (acetone- $d_6$ , 300.13 MHz)

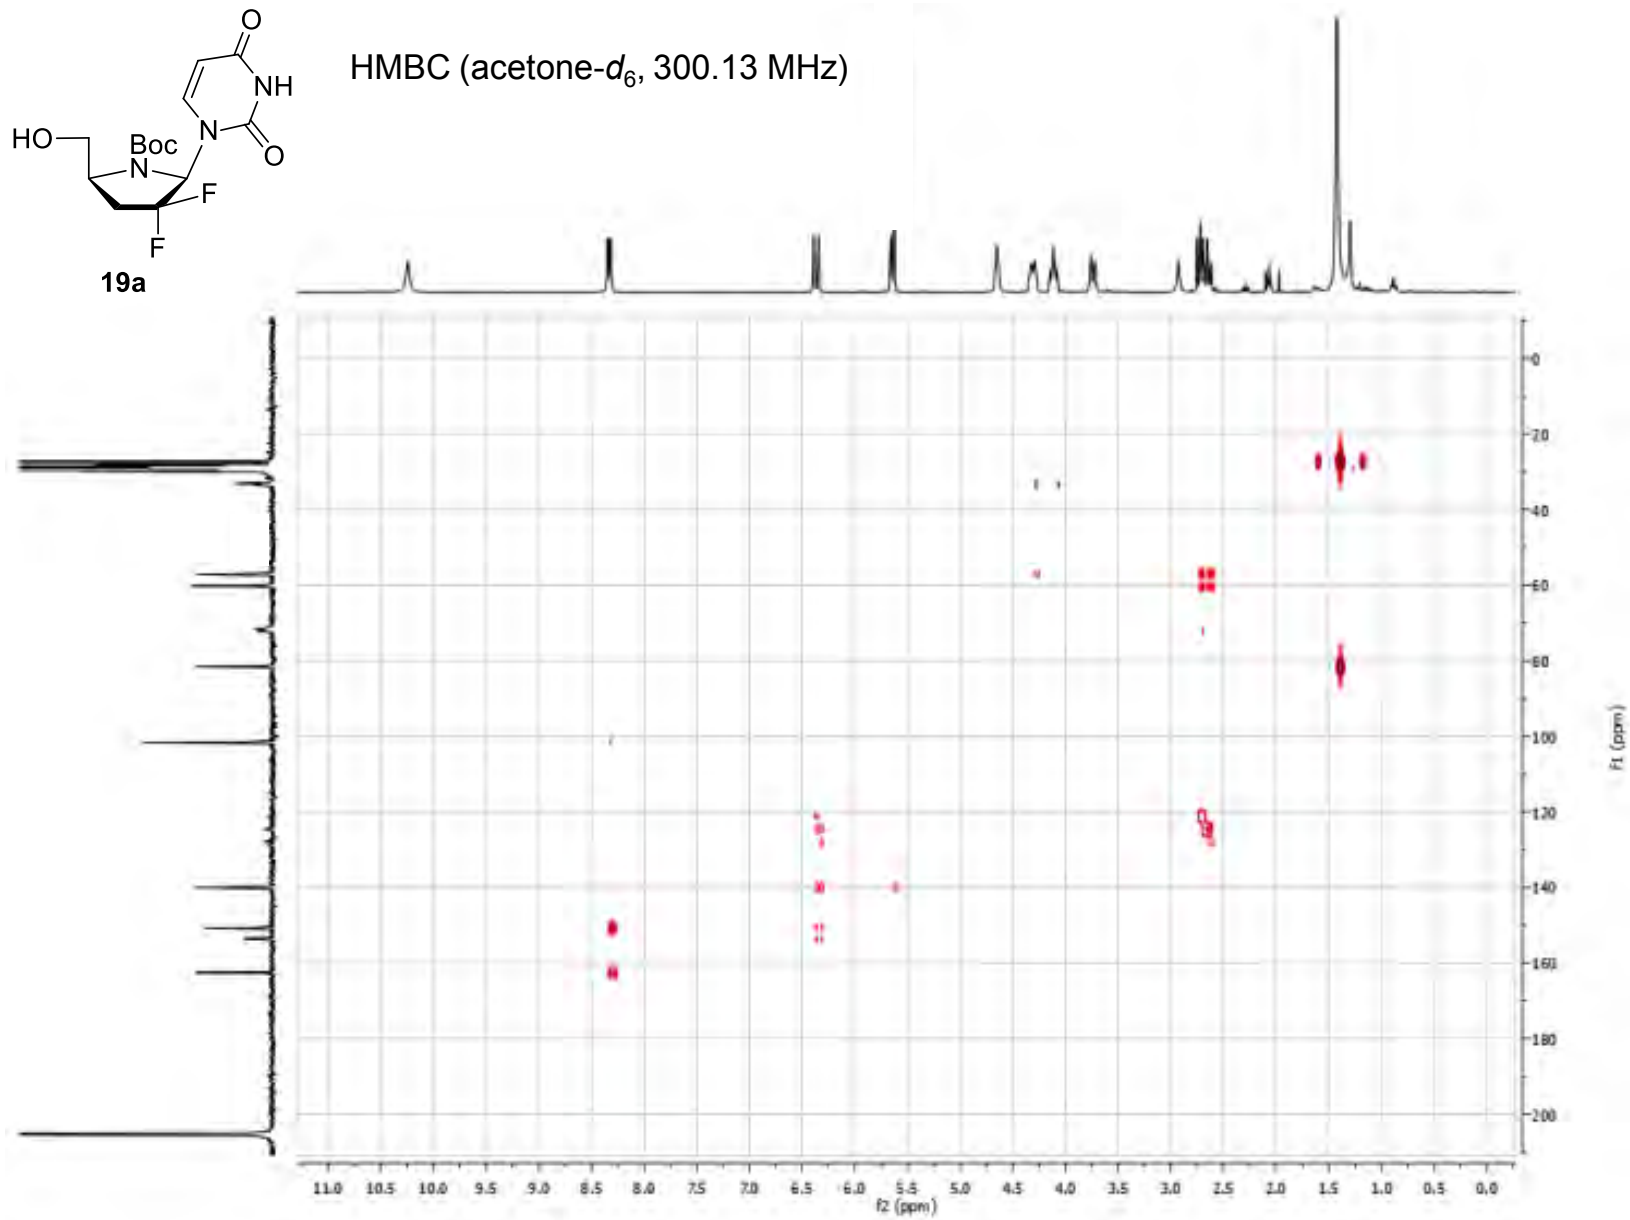



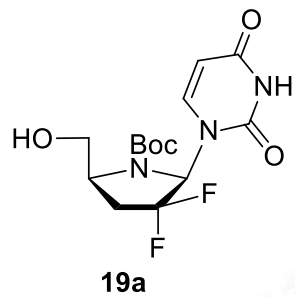

NOESY (acetone-*d*<sub>6</sub>, 300.13 MHz)

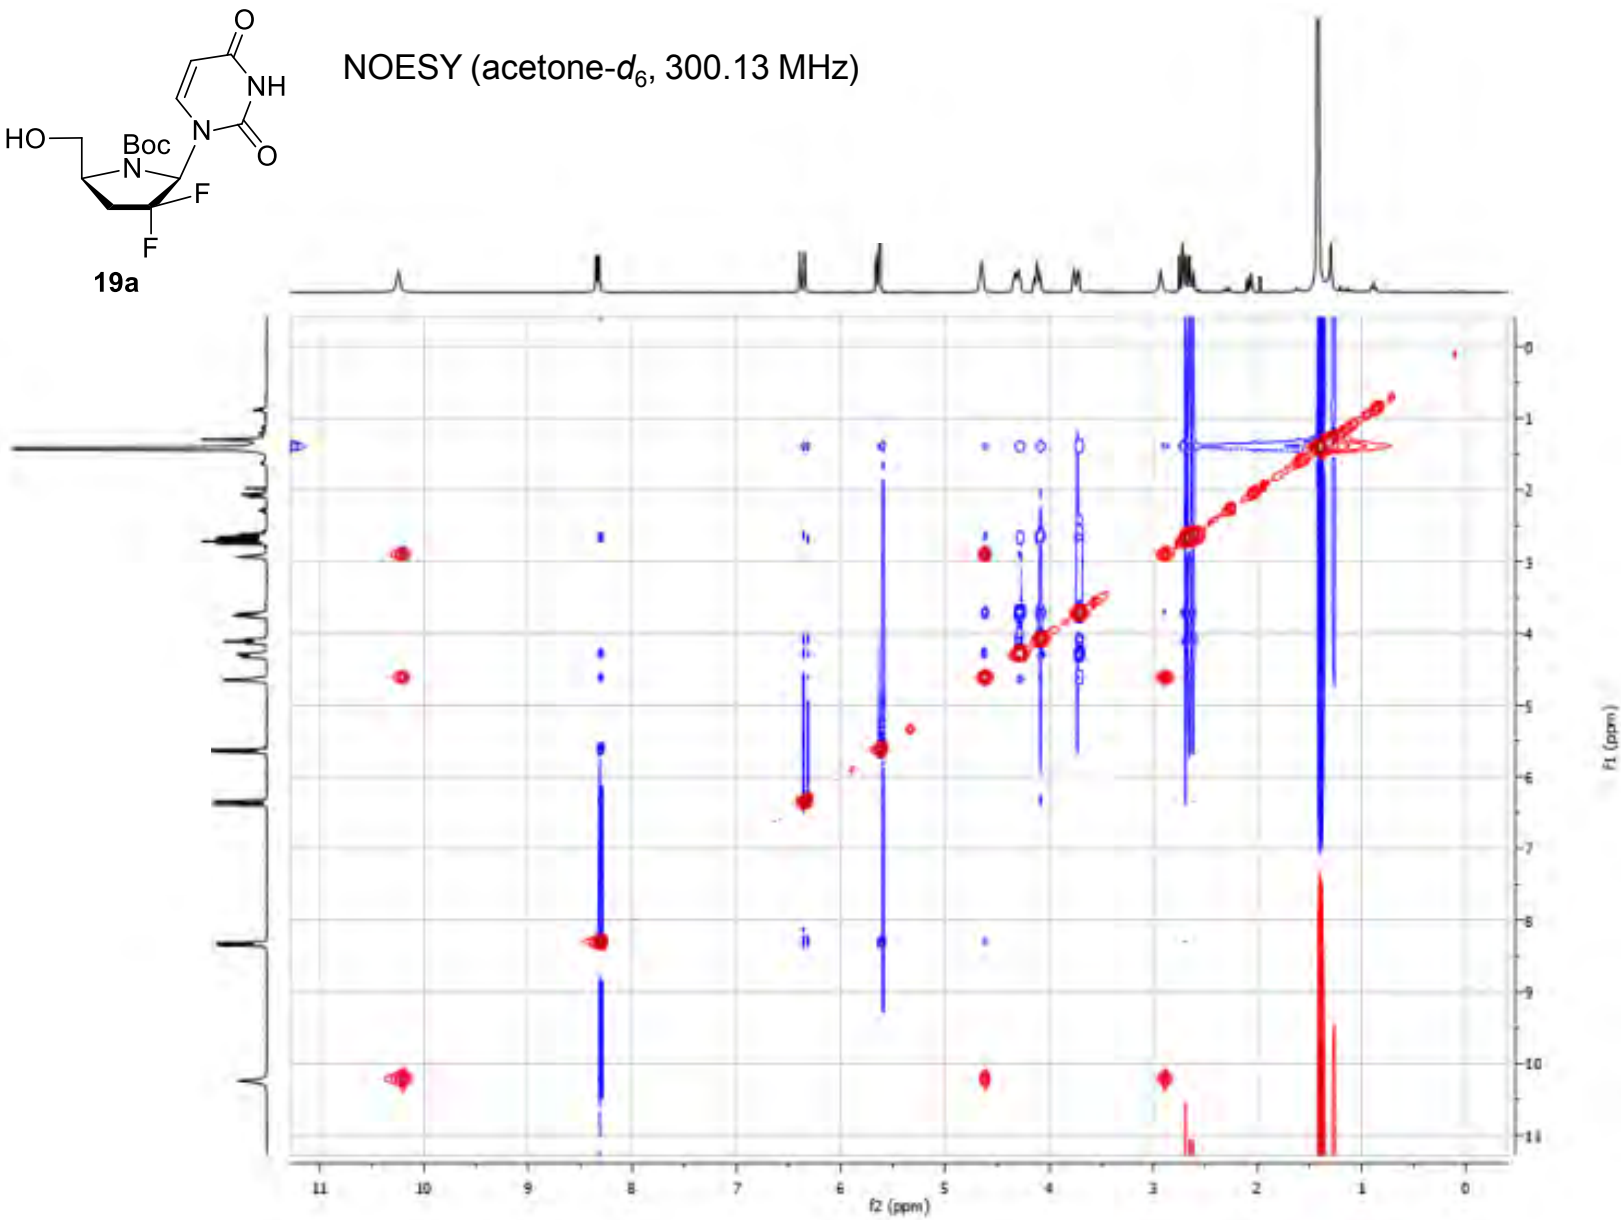

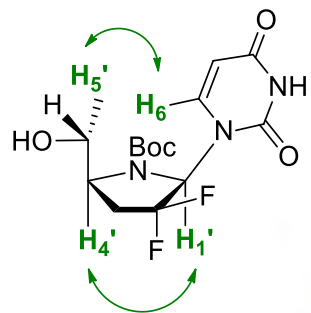

NOESY (acetone-*d*<sub>6</sub>, 300.13 MHz)

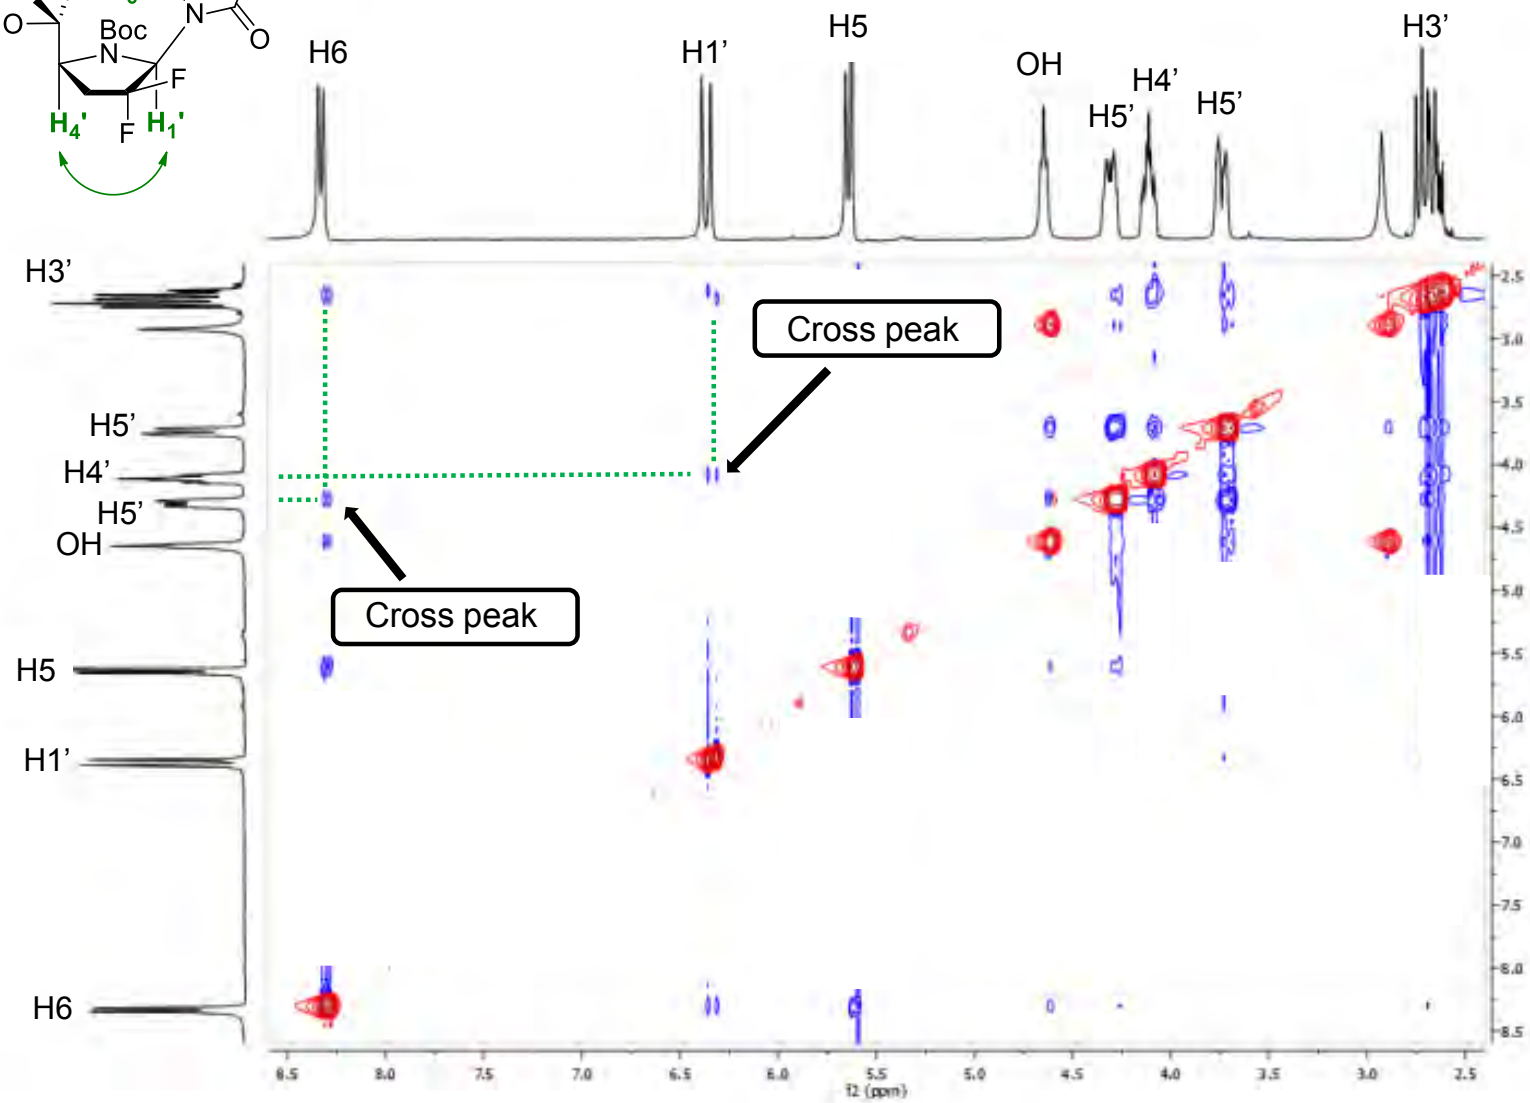

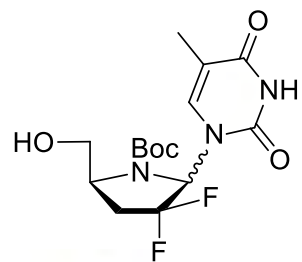

**18b/19b**

$^1\text{H}$  NMR ( $\text{CDCl}_3$ , 400.13 MHz)

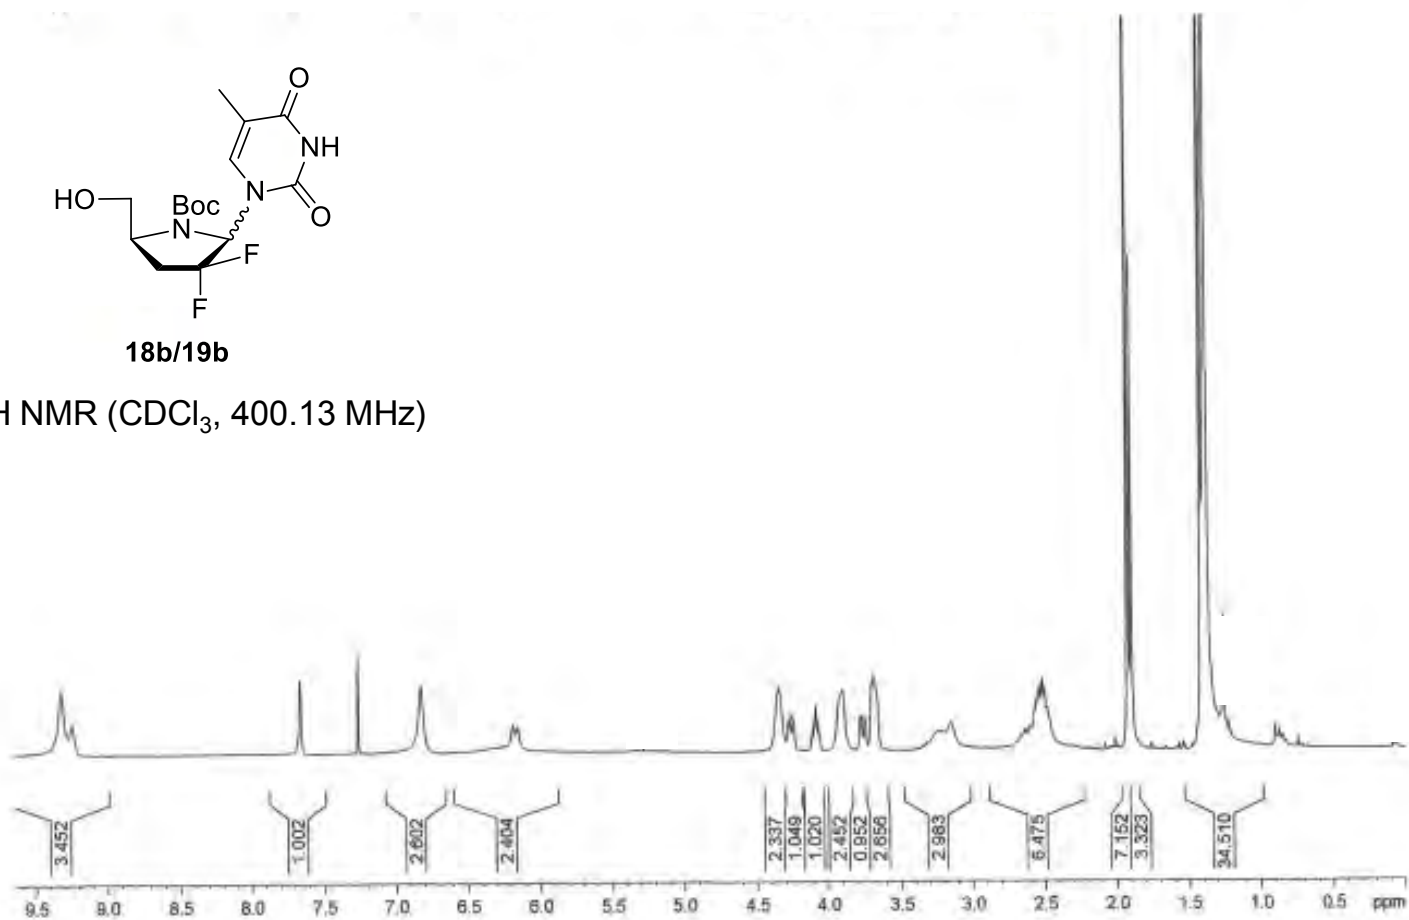

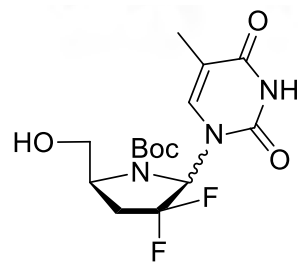

**18b/19b**

<sup>13</sup>C NMR (CDCl<sub>3</sub>, 100.6 MHz)

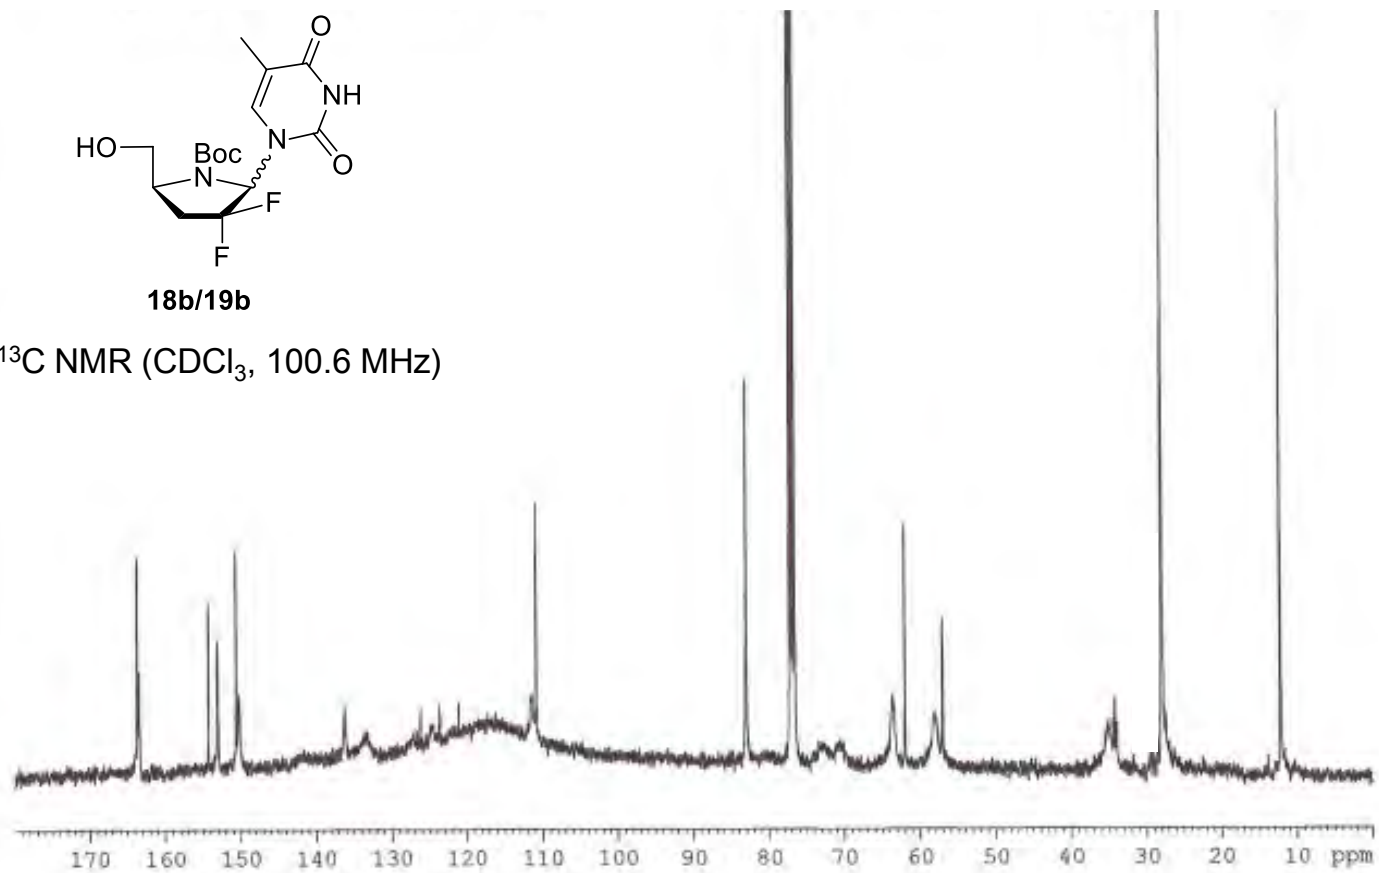

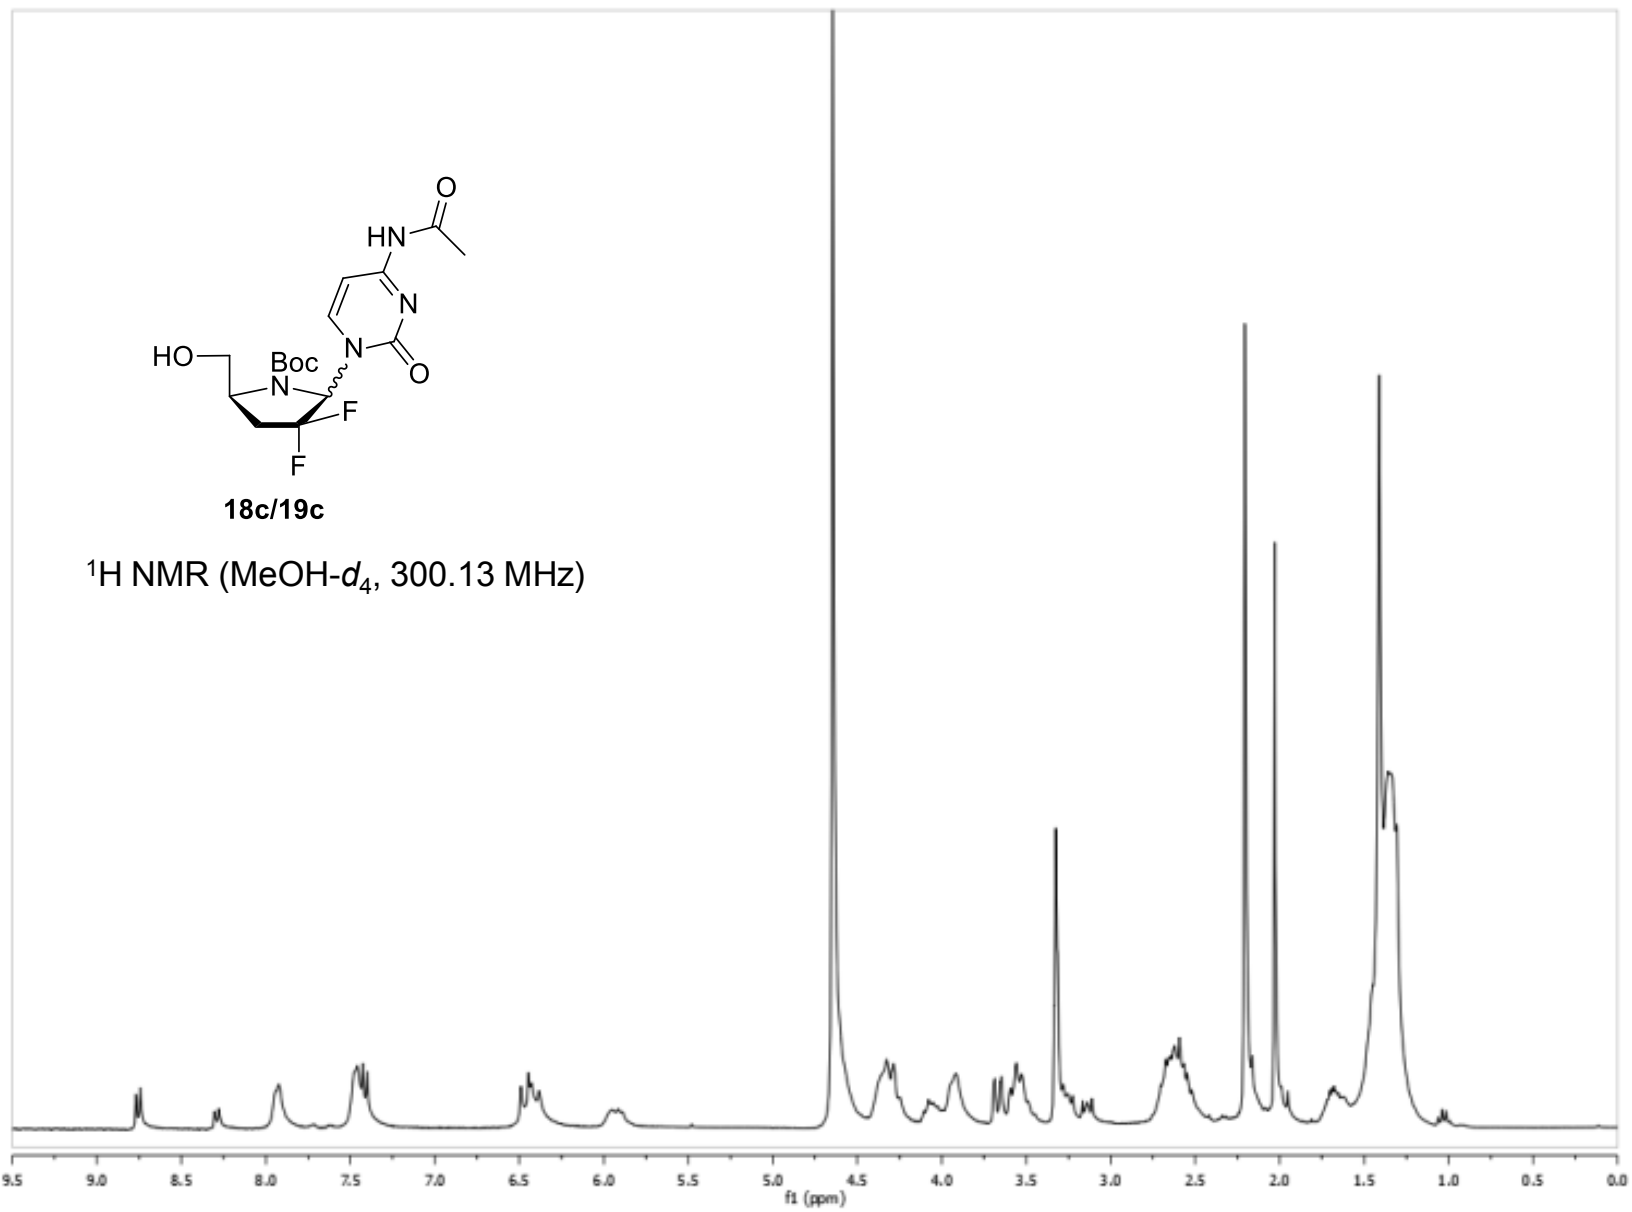

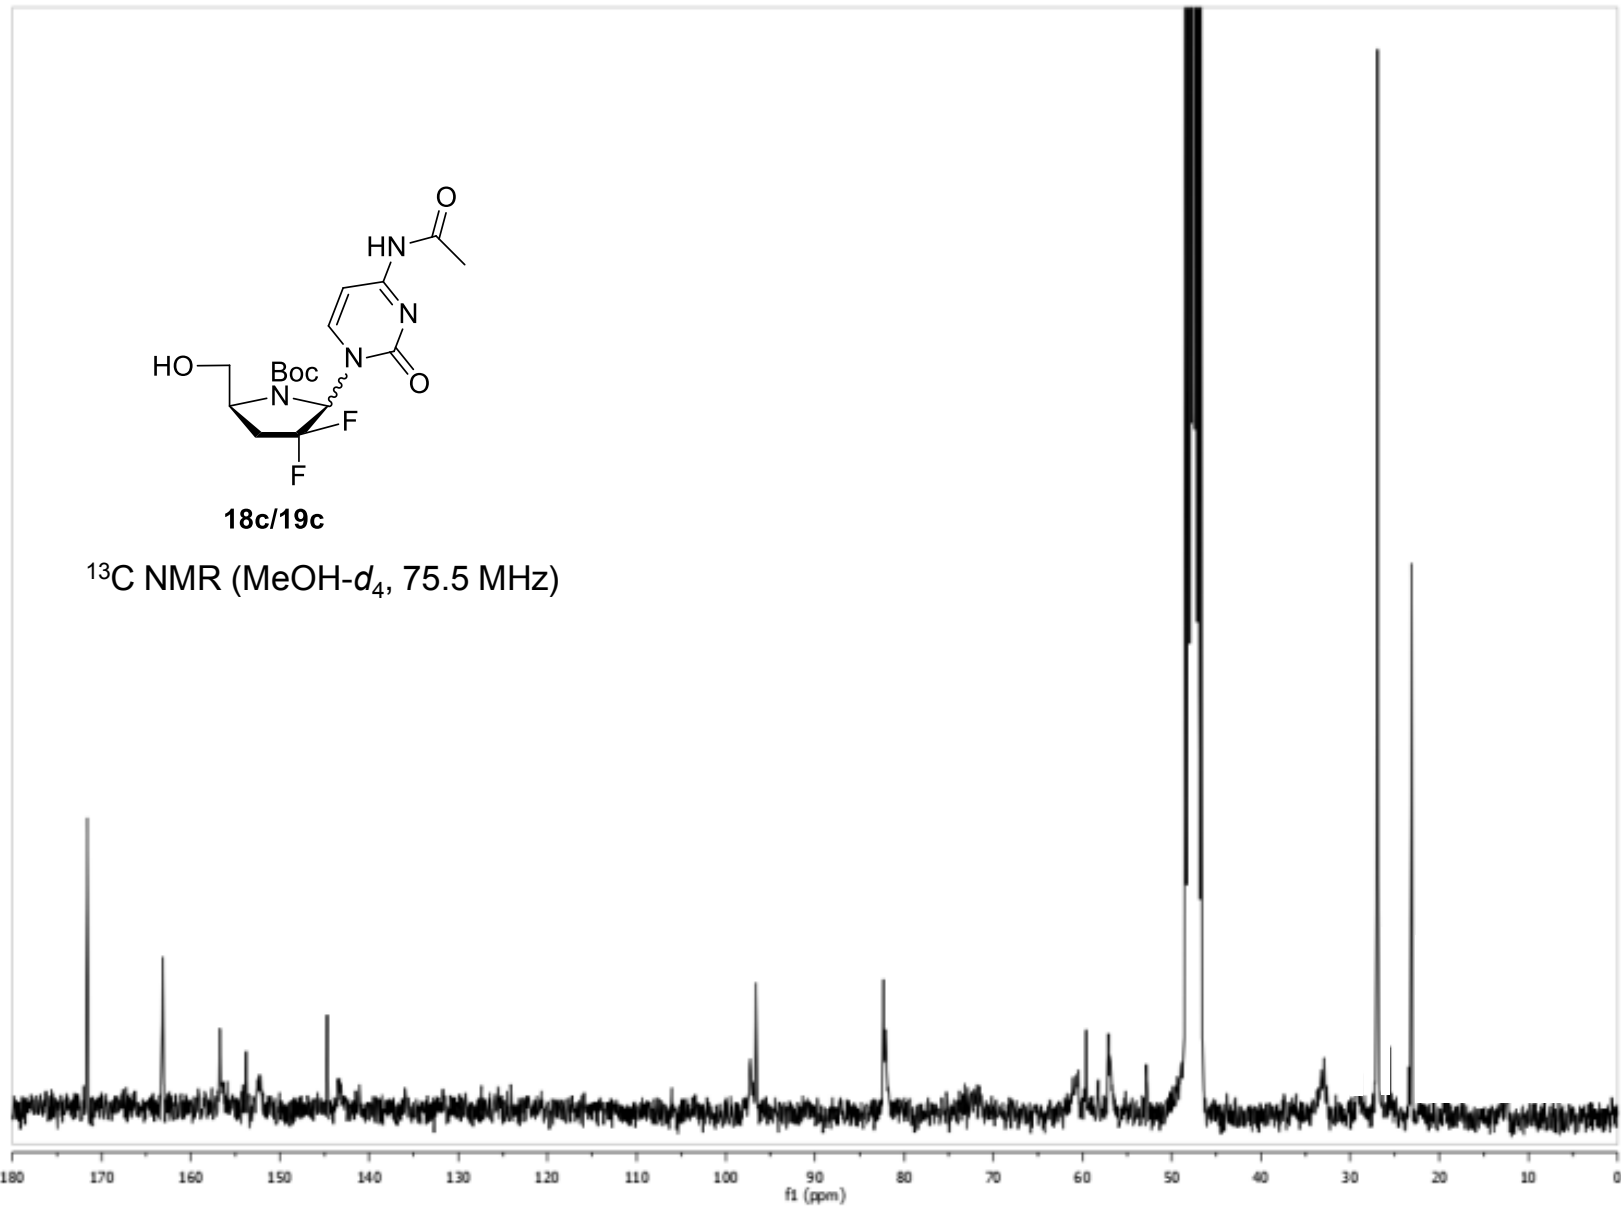

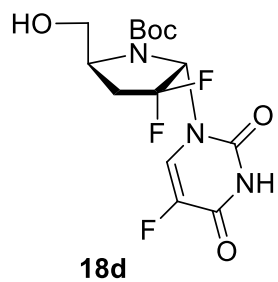

$^1\text{H}$  NMR (acetone- $d_6$ , 300.13 MHz)

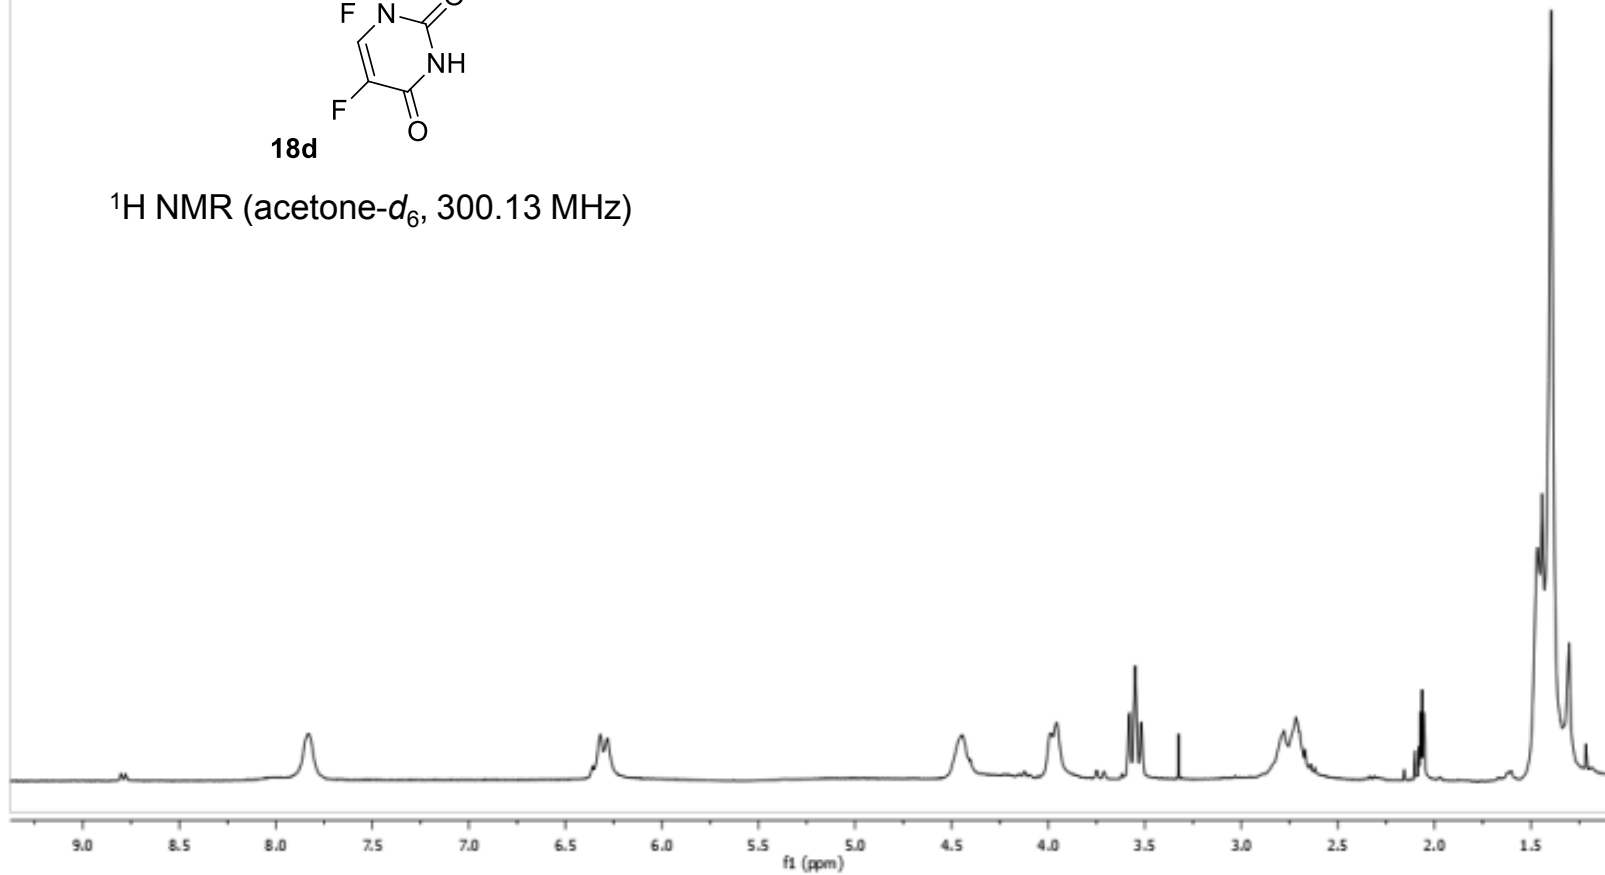

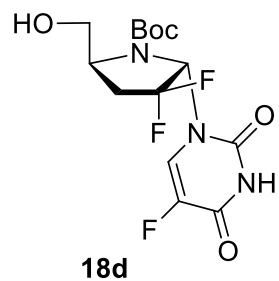

$^{13}\text{C}$  NMR (acetone- $d_6$ , 75.5 MHz)

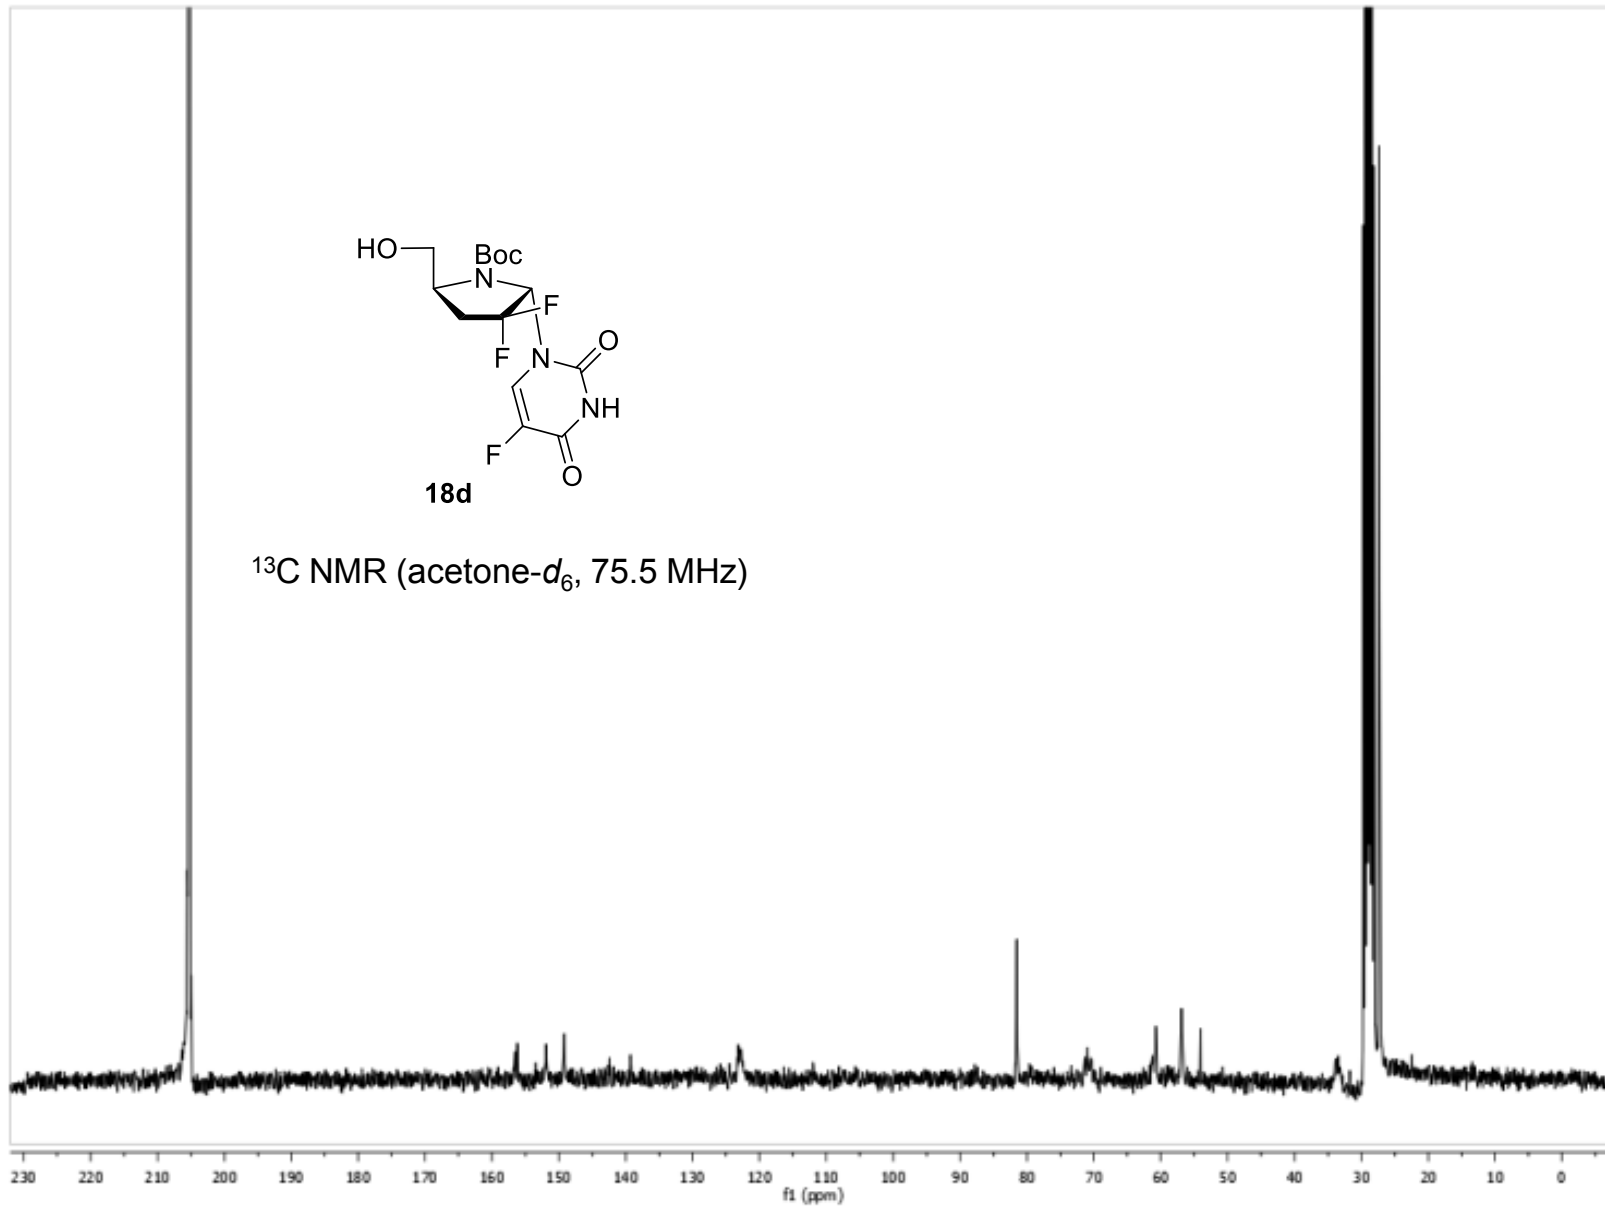



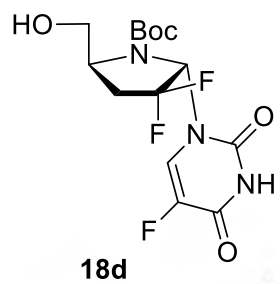

COSY (acetone- $d_6$ , 300.13 MHz)

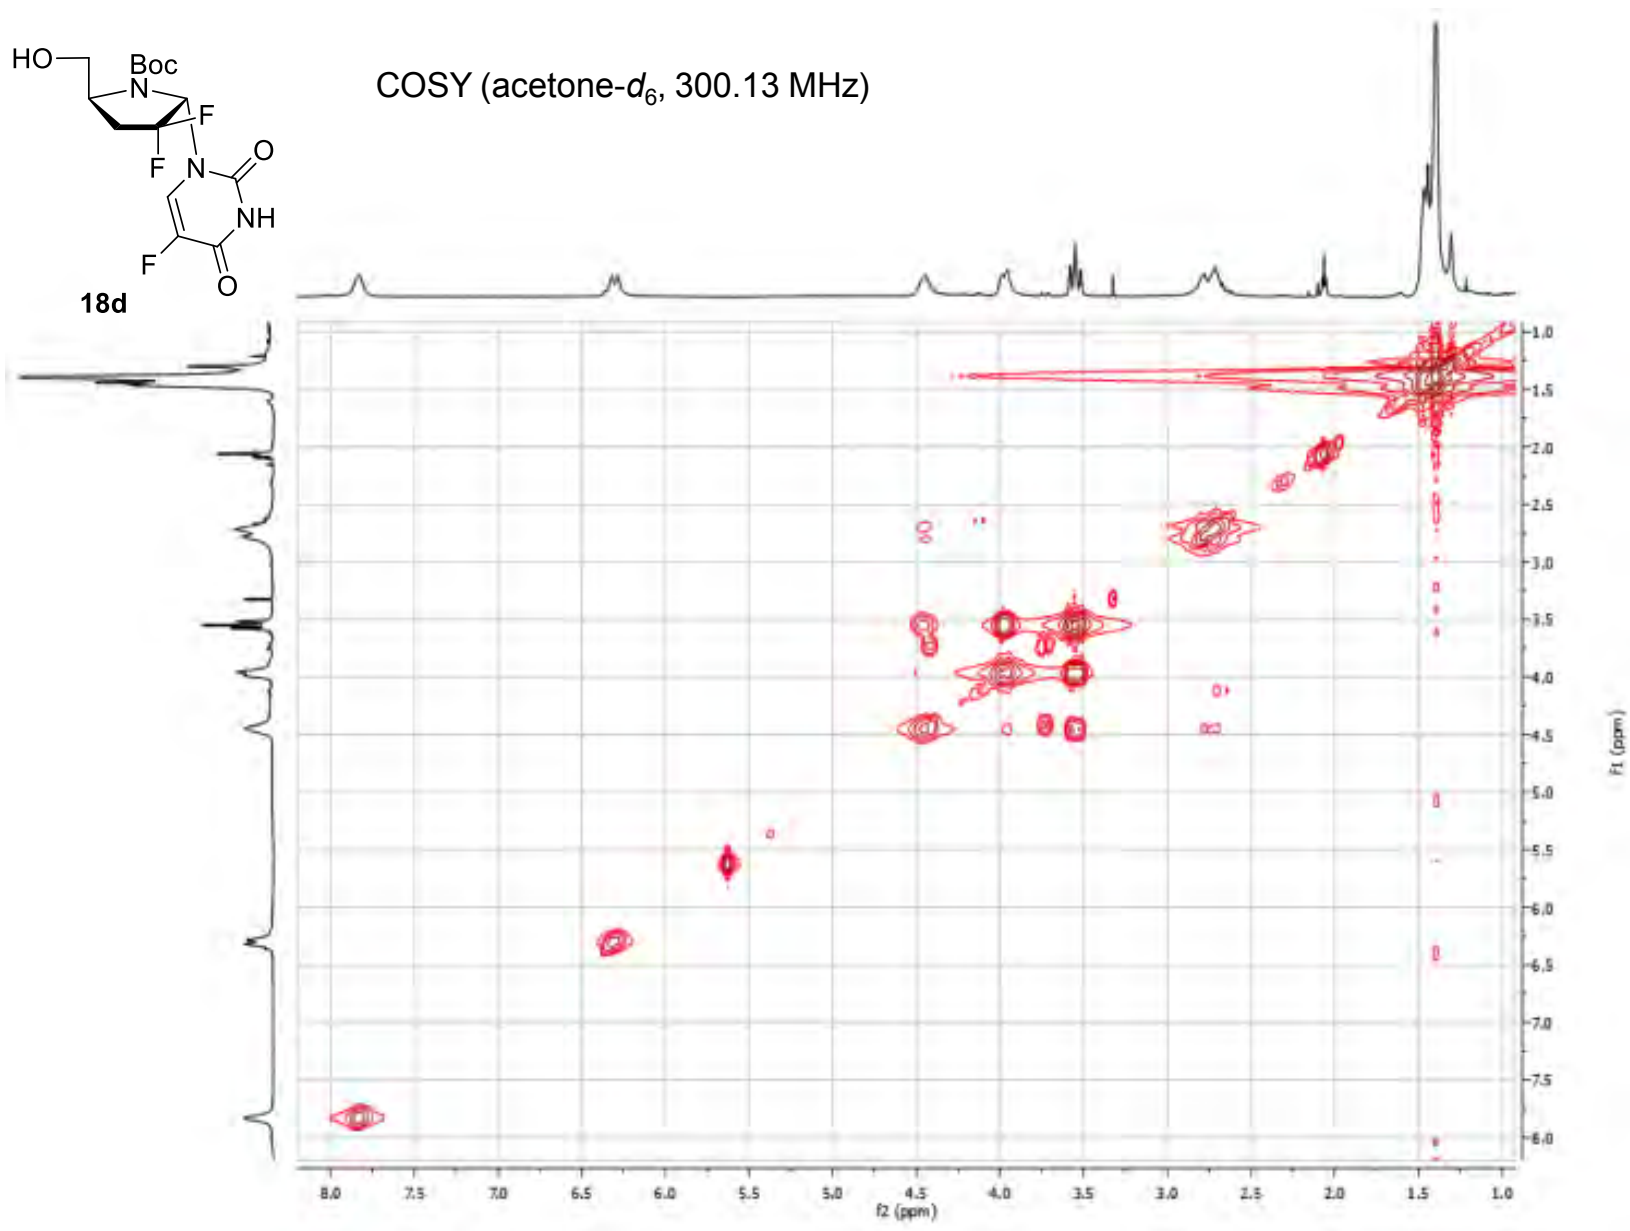

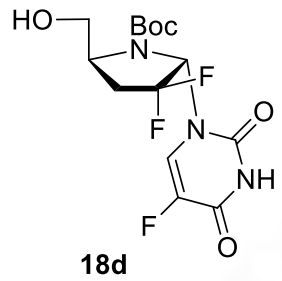

HSQC (acetone- $d_6$ , 300.13 MHz)

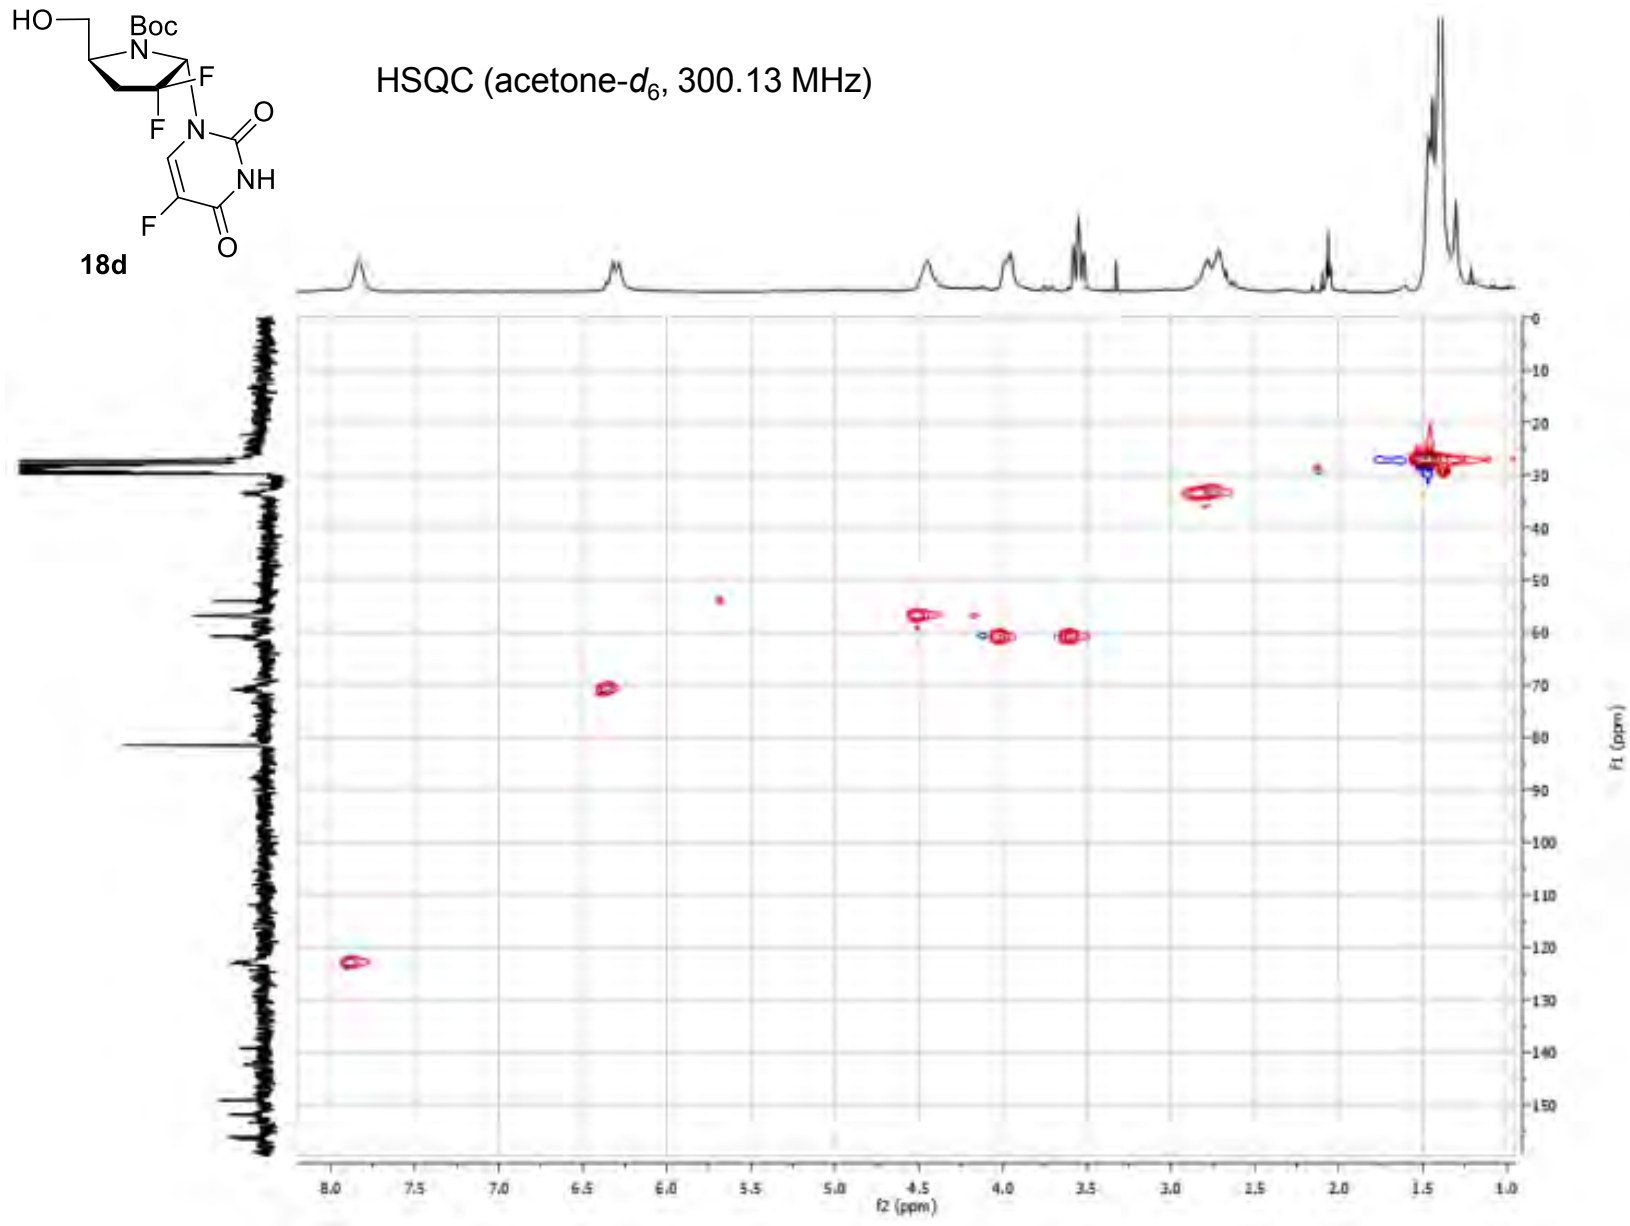

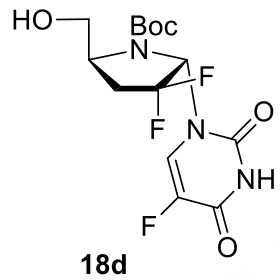

HMBC (acetone- $d_6$ , 300.13 MHz)

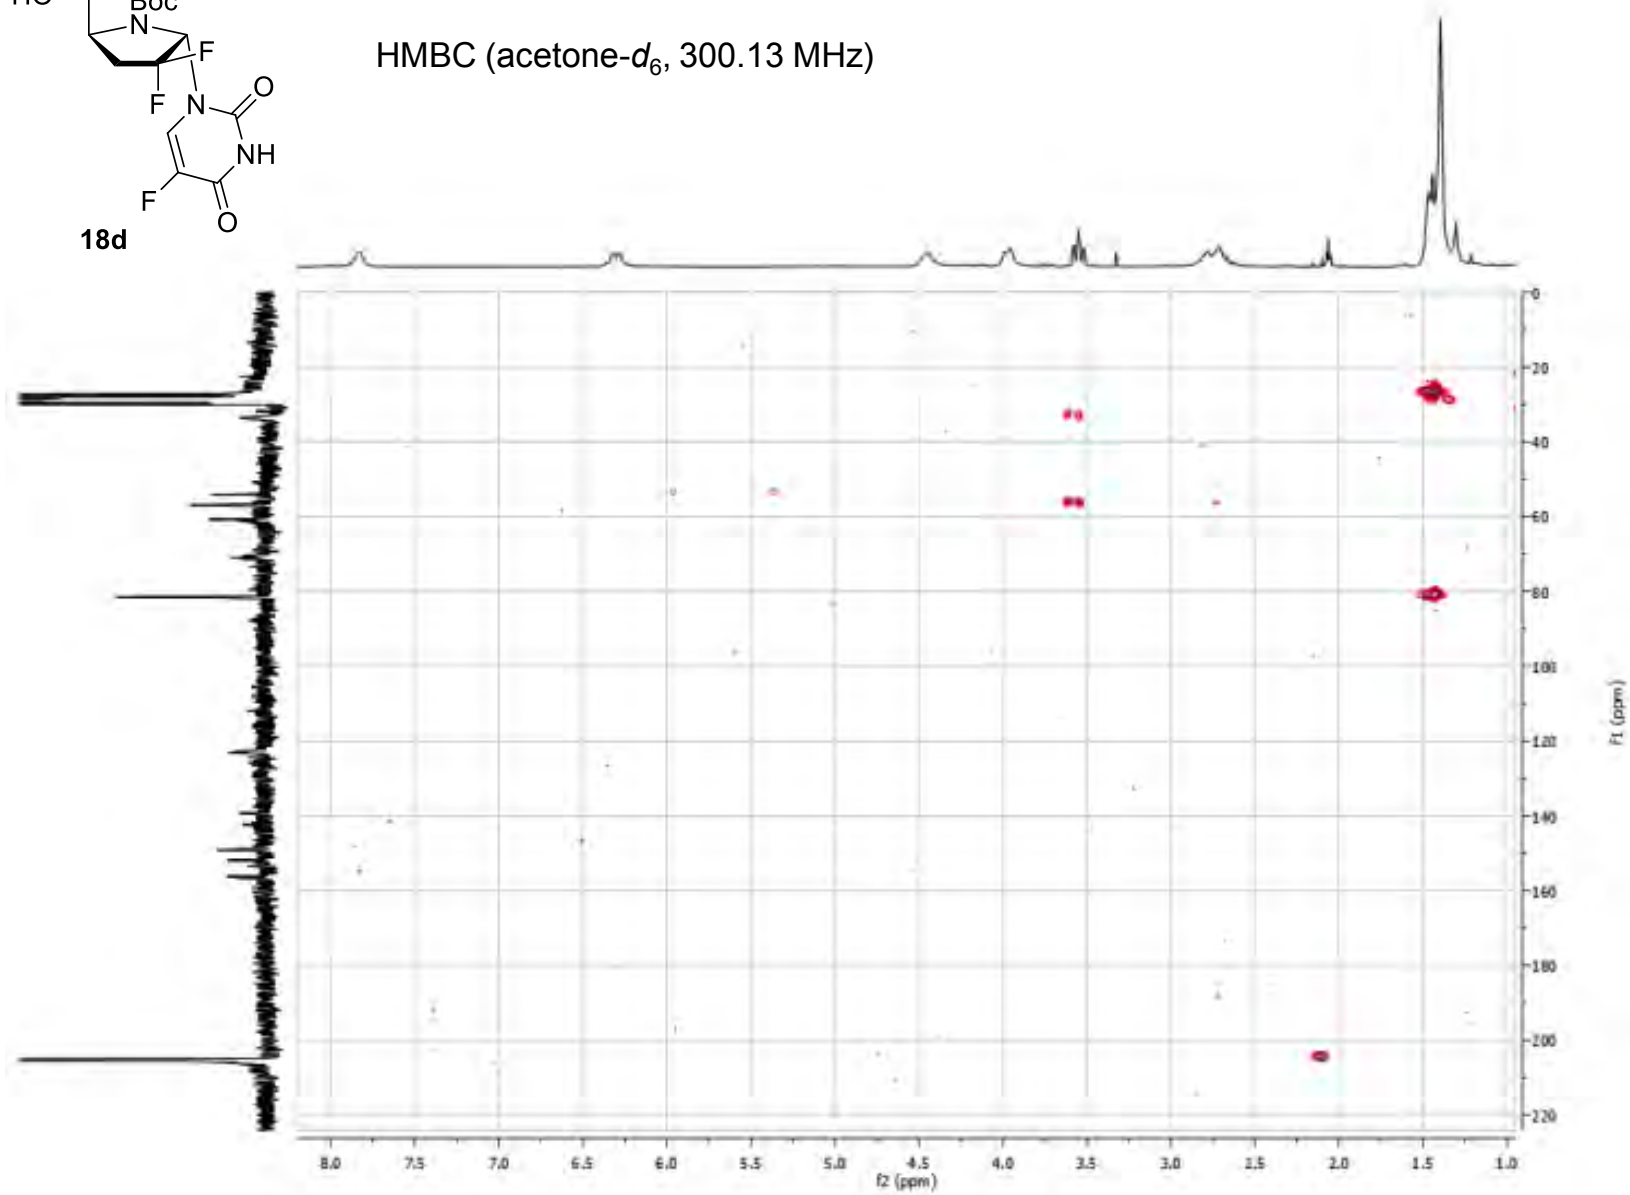

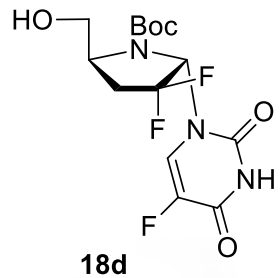

NOESY (acetone- $d_6$ , 300.13 MHz)

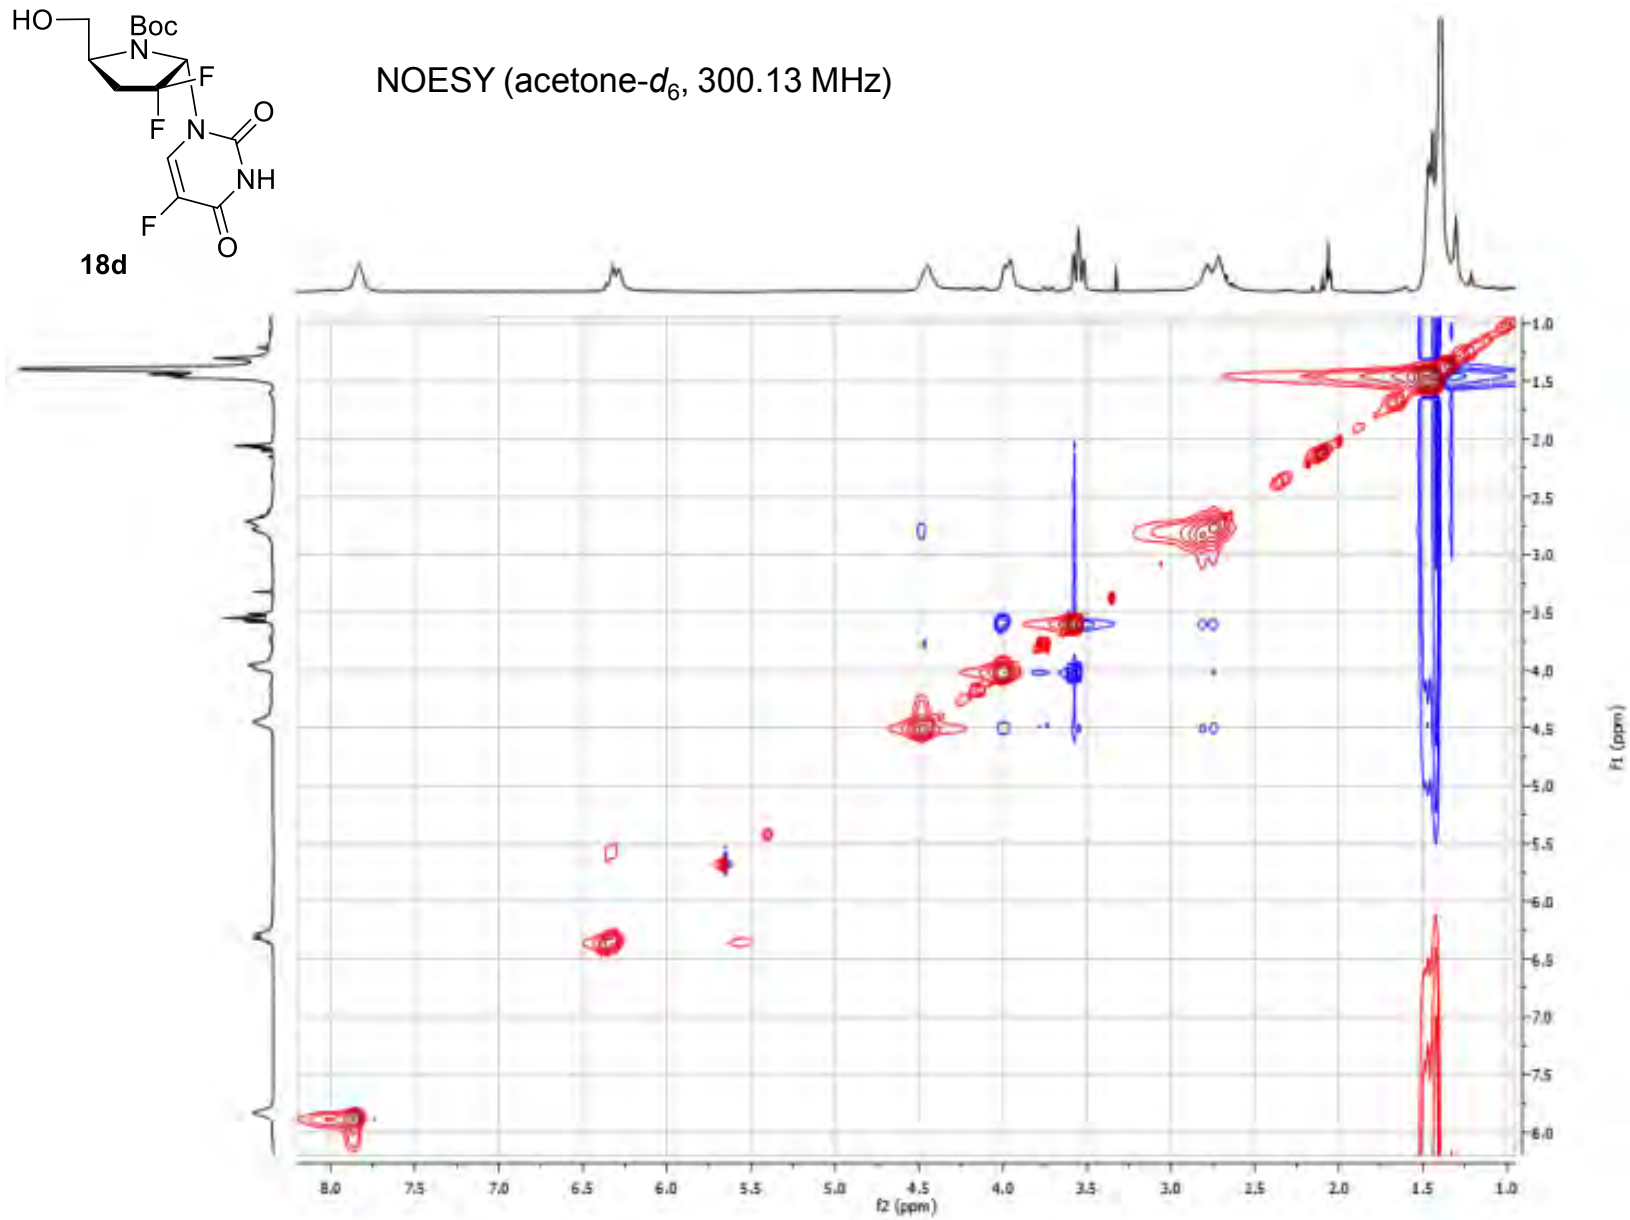

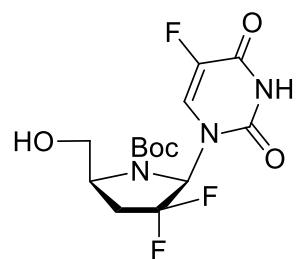

**19d**

$^1\text{H}$  NMR (acetone- $d_6$ , 300.13 MHz)

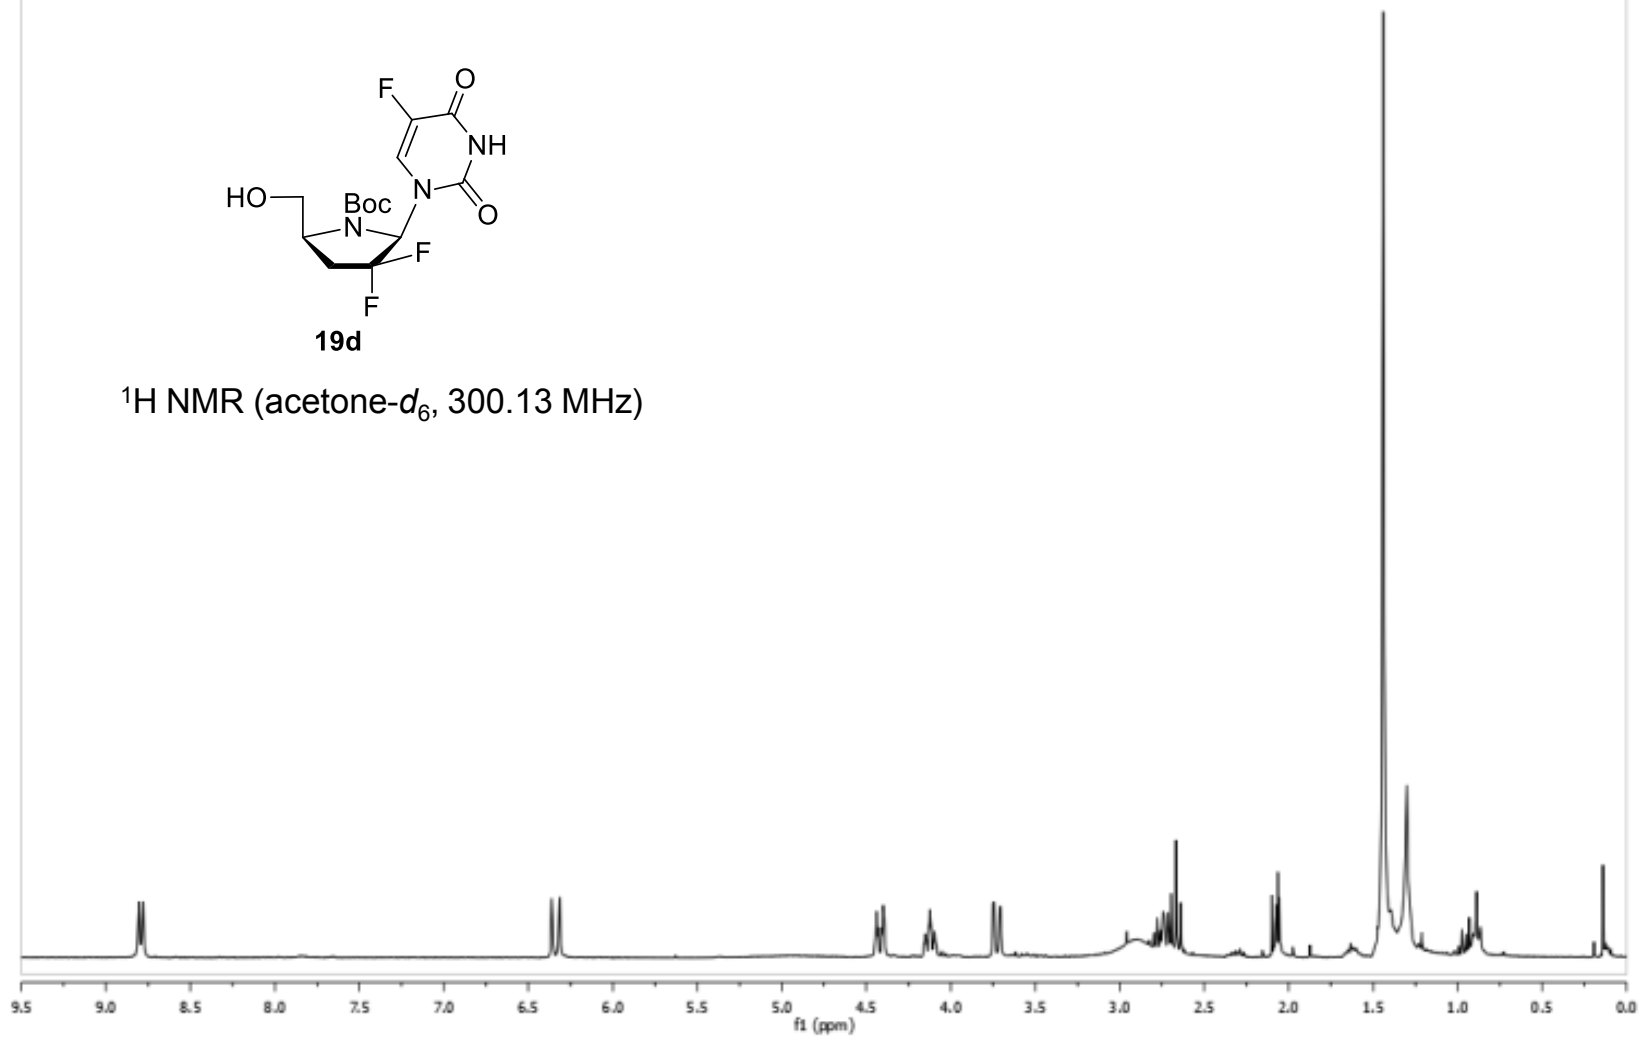

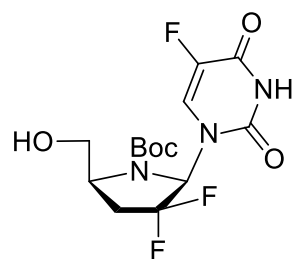

19d

$^{13}\text{C}$  NMR (acetone- $d_6$ , 75.5 MHz)

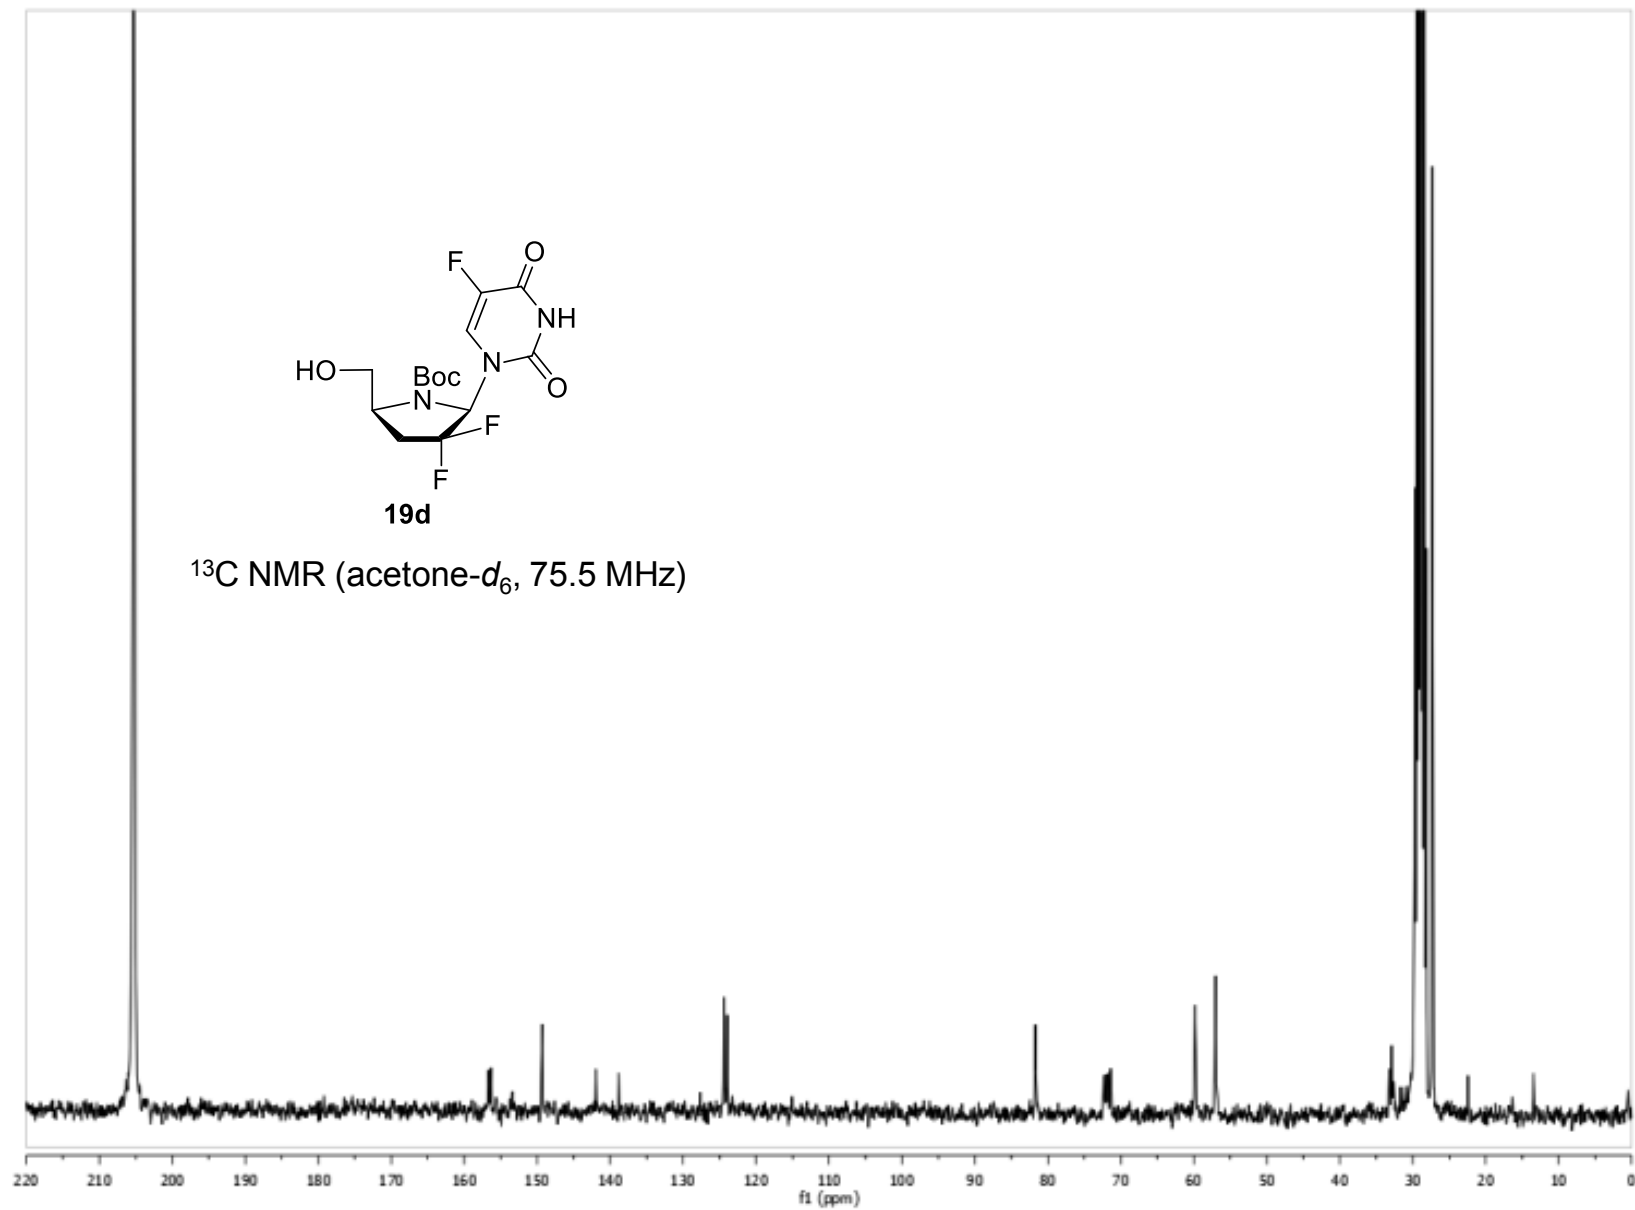

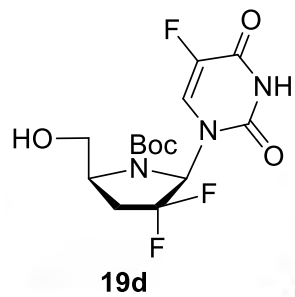

COSY (acetone- $d_6$ , 300.13 MHz)

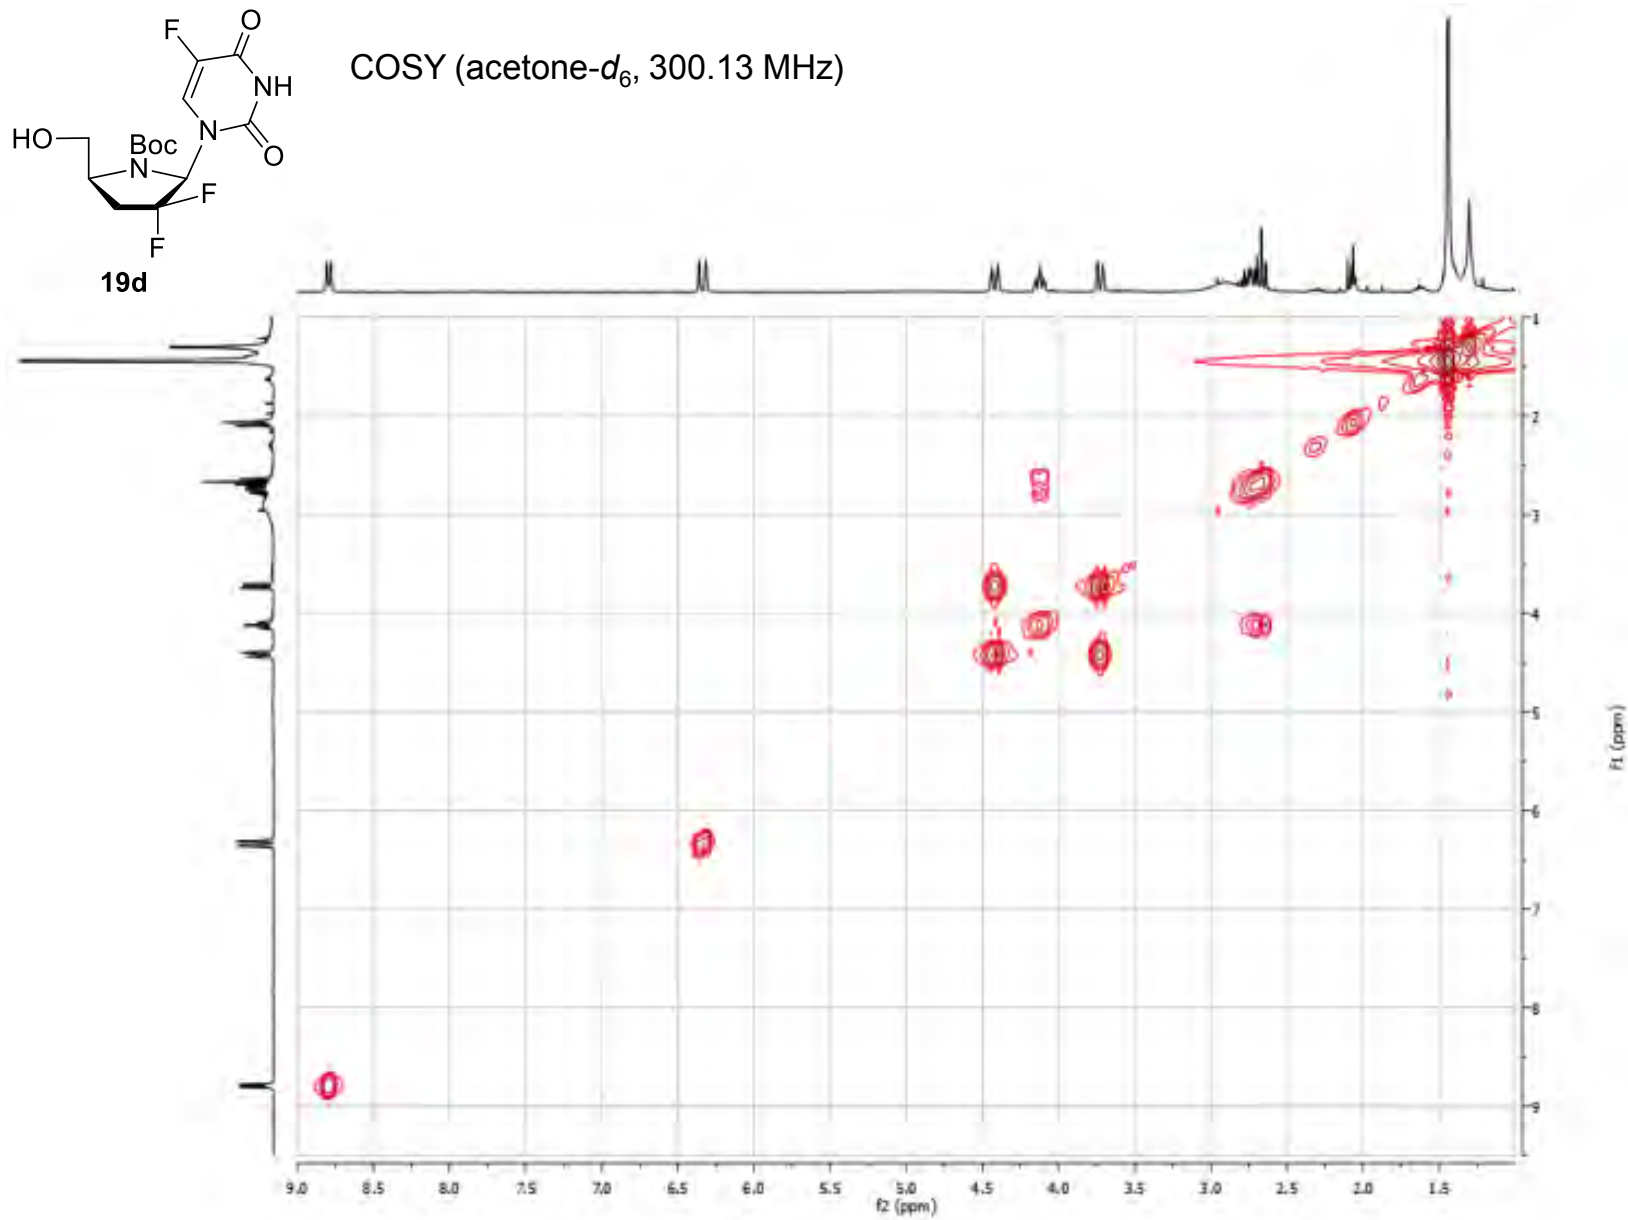

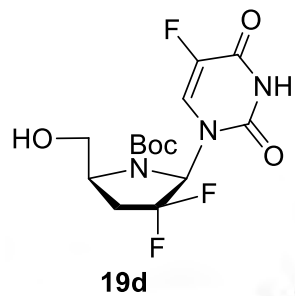

HSQC (acetone- $d_6$ , 300.13 MHz)

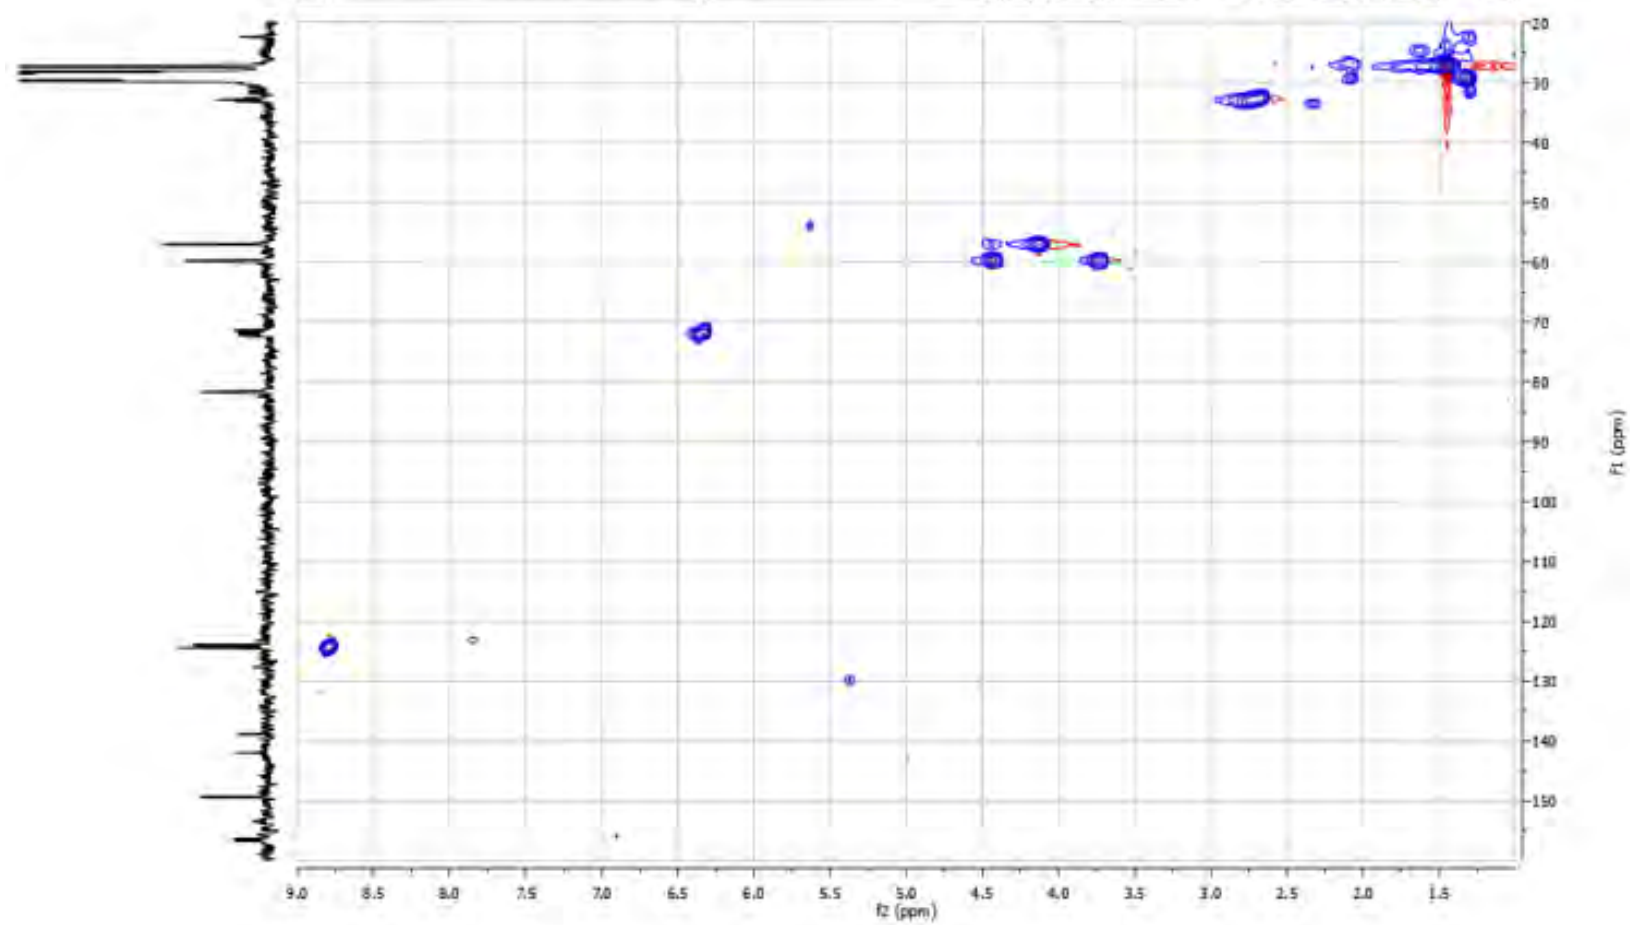



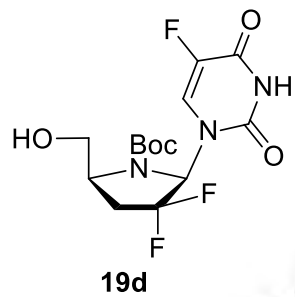

HMBC (acetone- $d_6$ , 300.13 MHz)

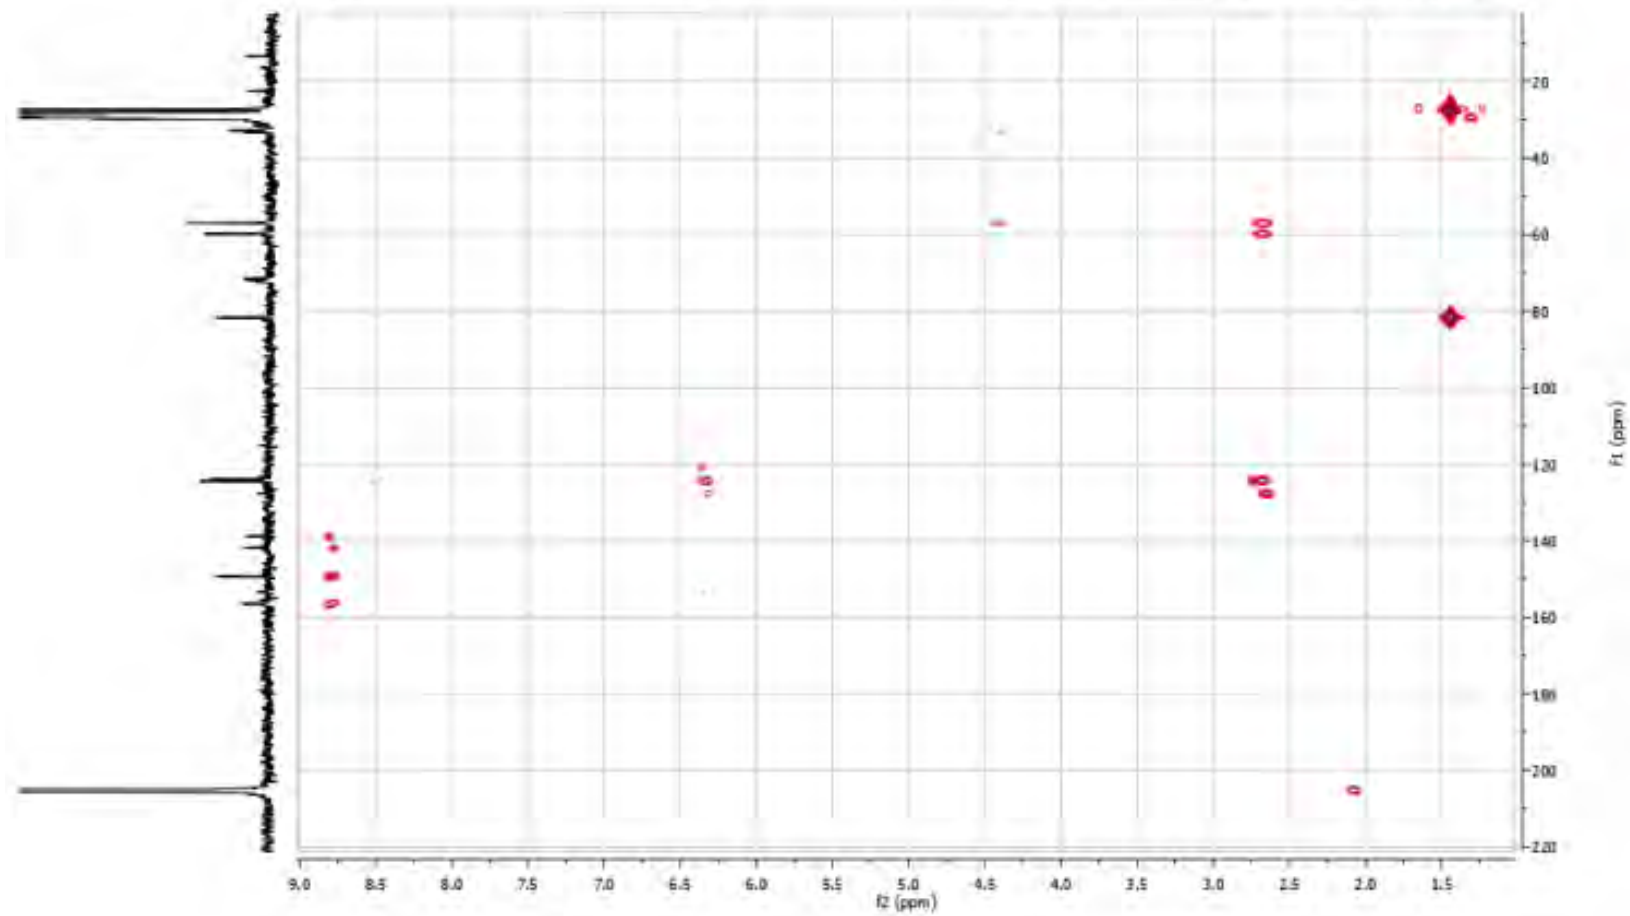

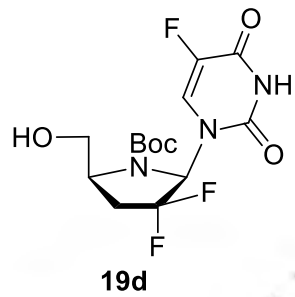

NOESY (acetone- $d_6$ , 400.13 MHz)

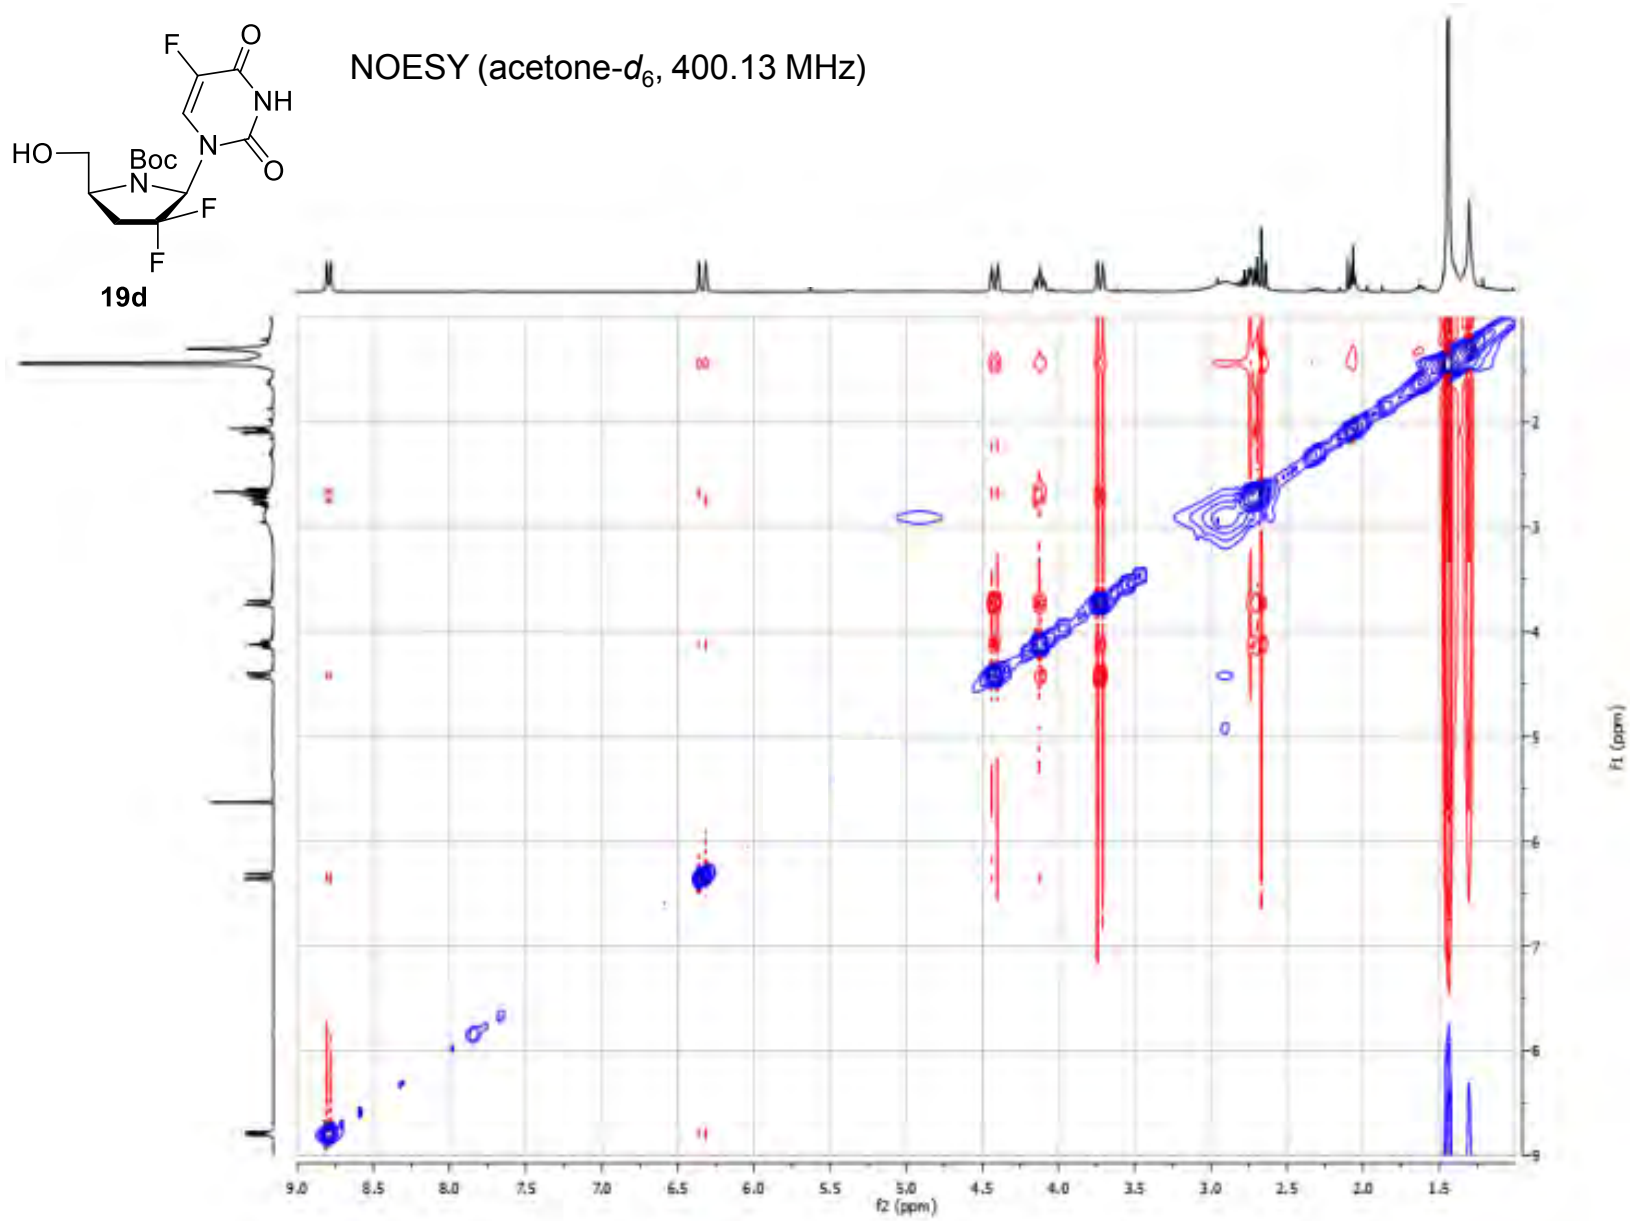

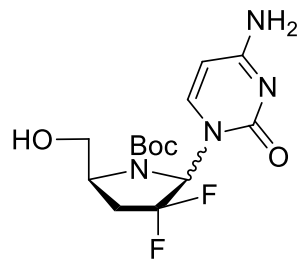

**20c/21c**

<sup>1</sup>H NMR (MeOH-*d*<sub>4</sub>, 300.13 MHz)

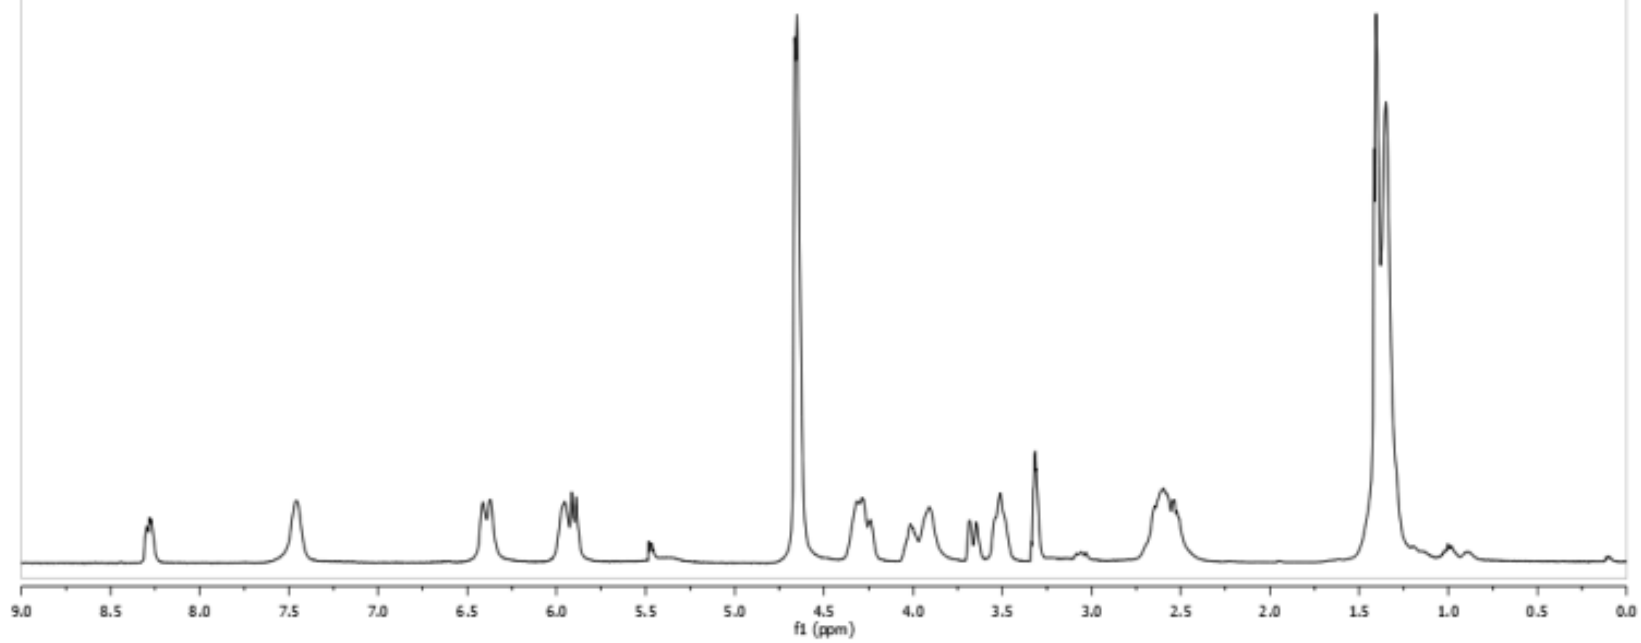

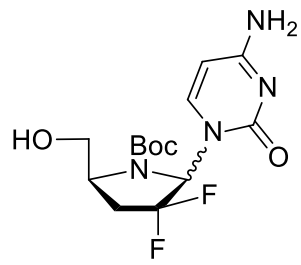

20c/21c

$^{13}\text{C}$  NMR (MeOH- $d_4$ , 75.5 MHz)

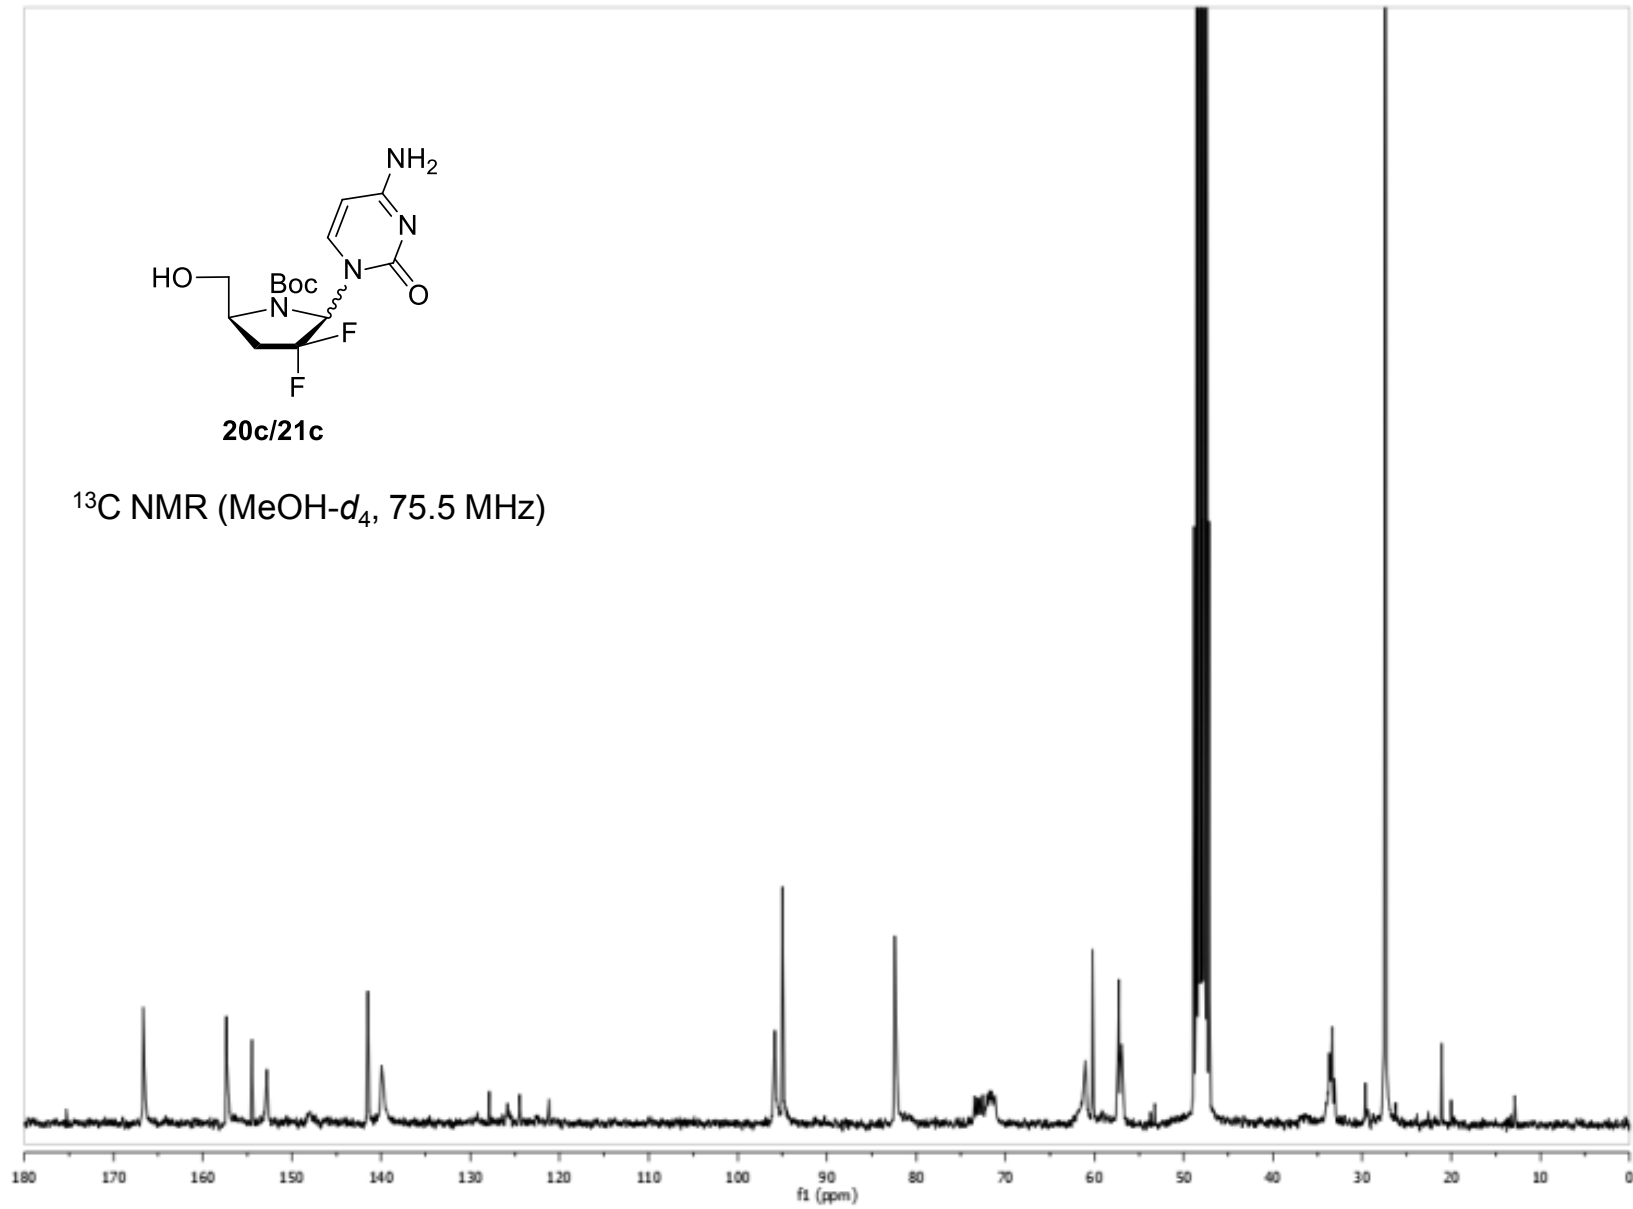

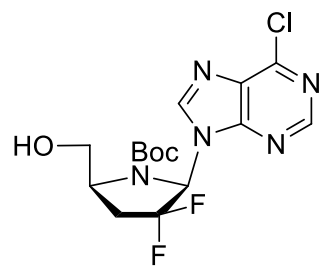

26

$^1\text{H NMR}$  (THF- $d_8$ , 400.13 MHz)

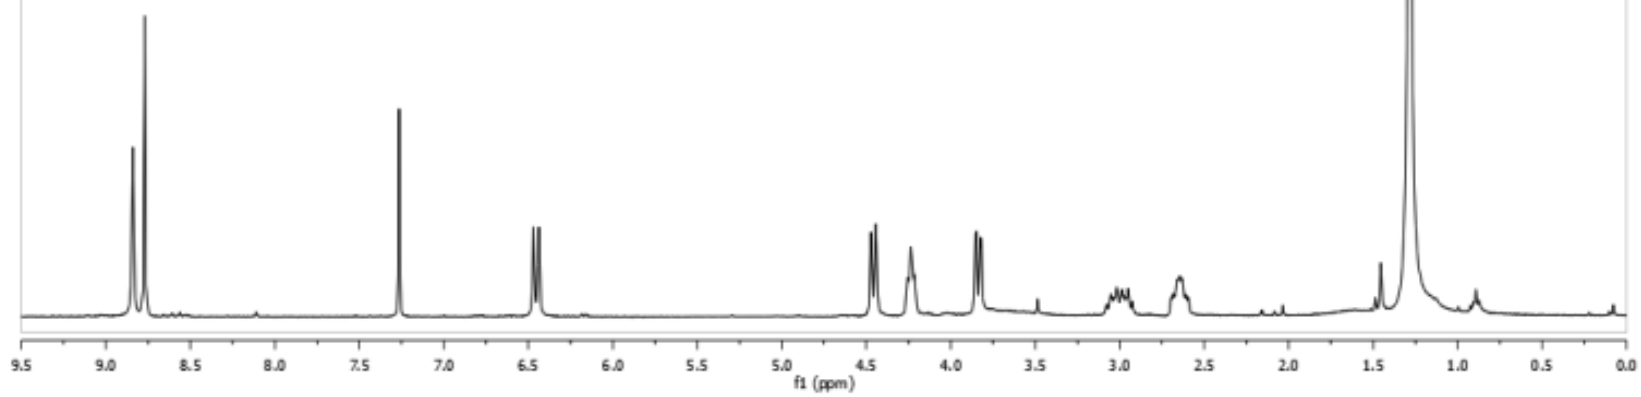



26

$^{13}\text{C}$  NMR (THF- $d_8$ , 75.5 MHz)

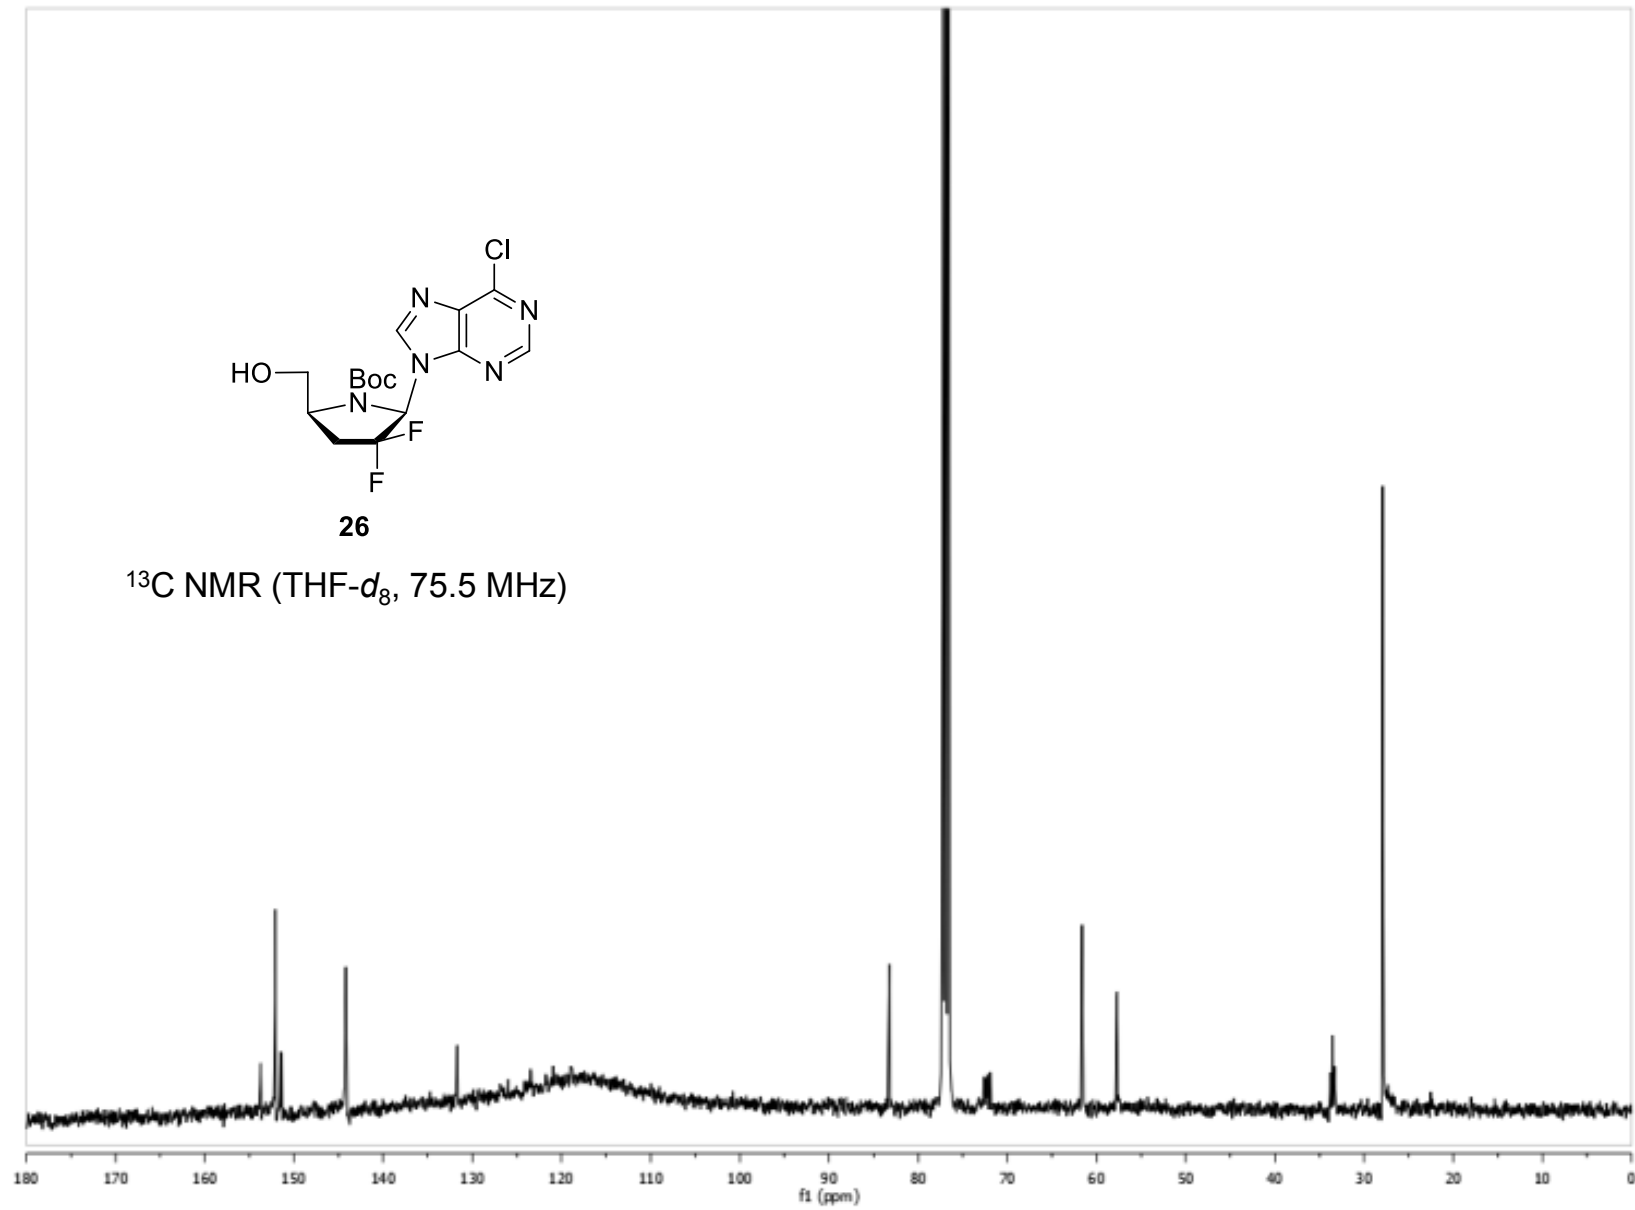

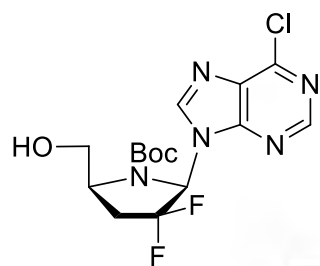

26

COSY (THF-*d*<sub>8</sub>, 400.13 MHz)

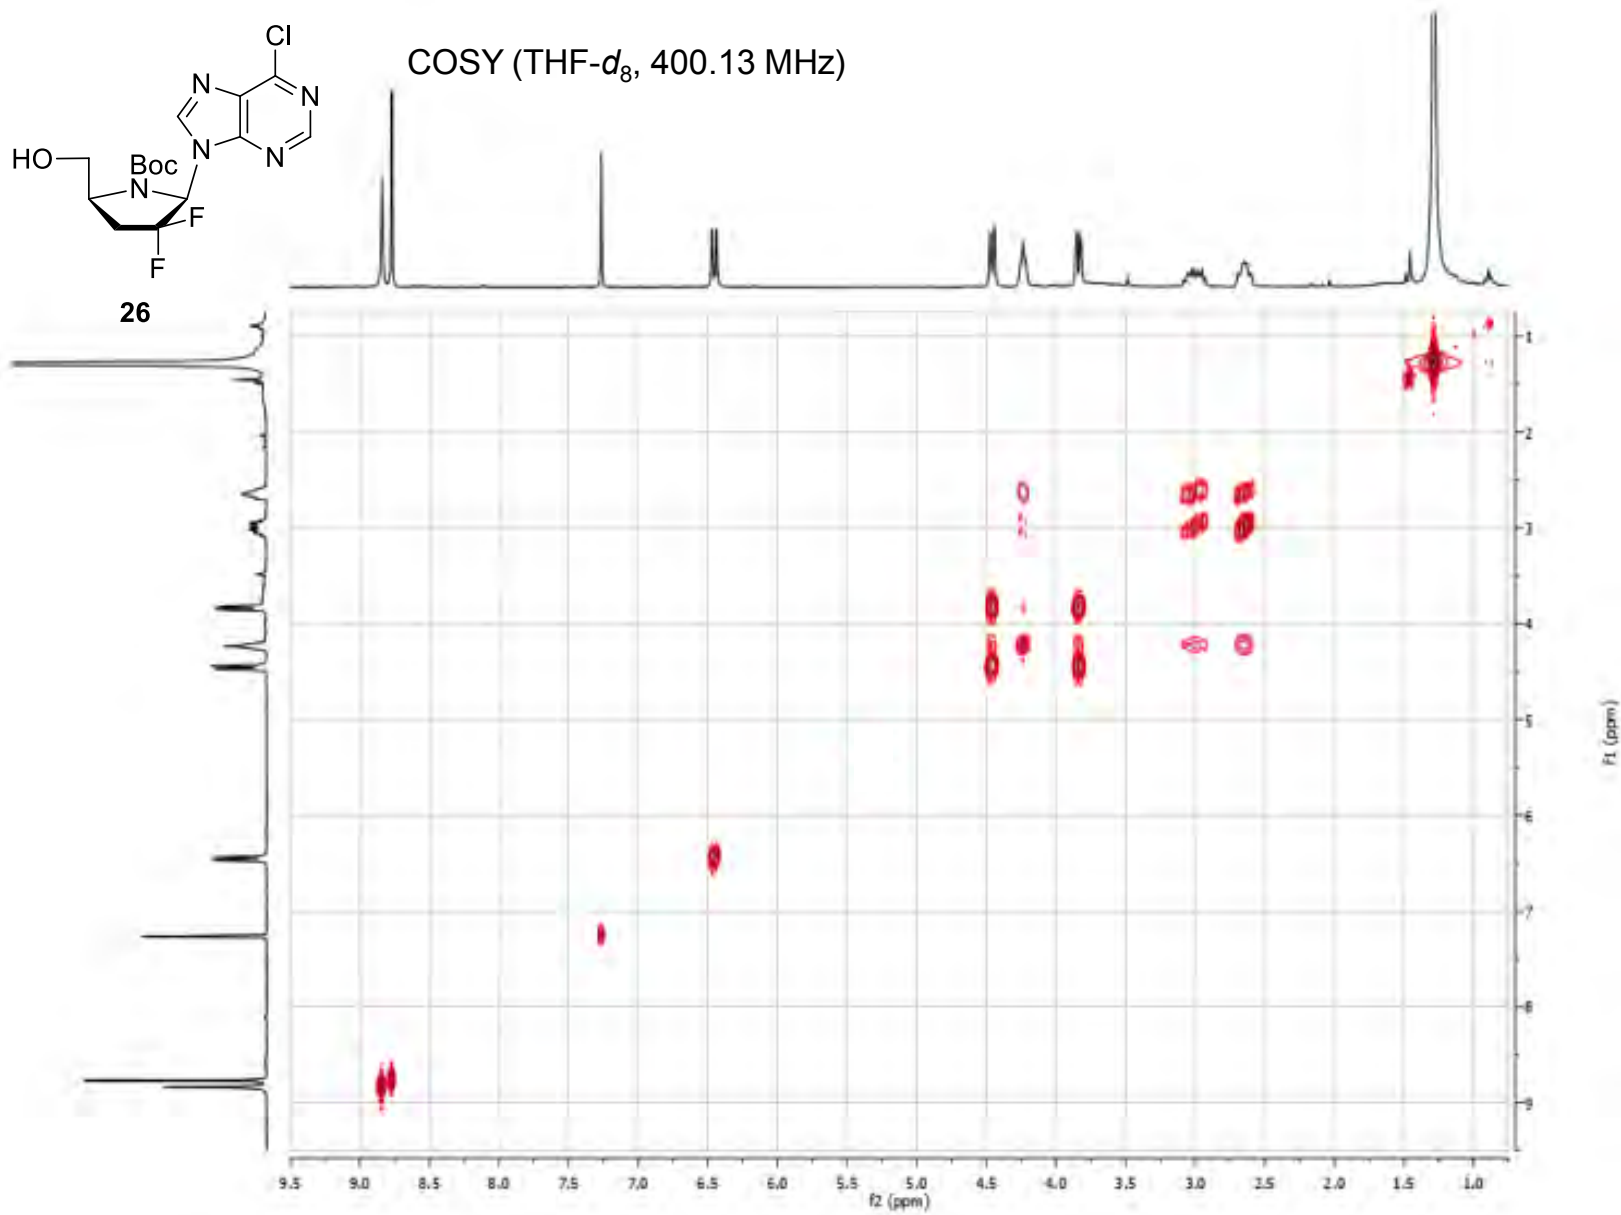

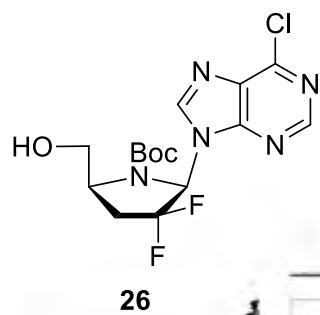

HSQC (THF-*d*<sub>8</sub>, 400.13 MHz)

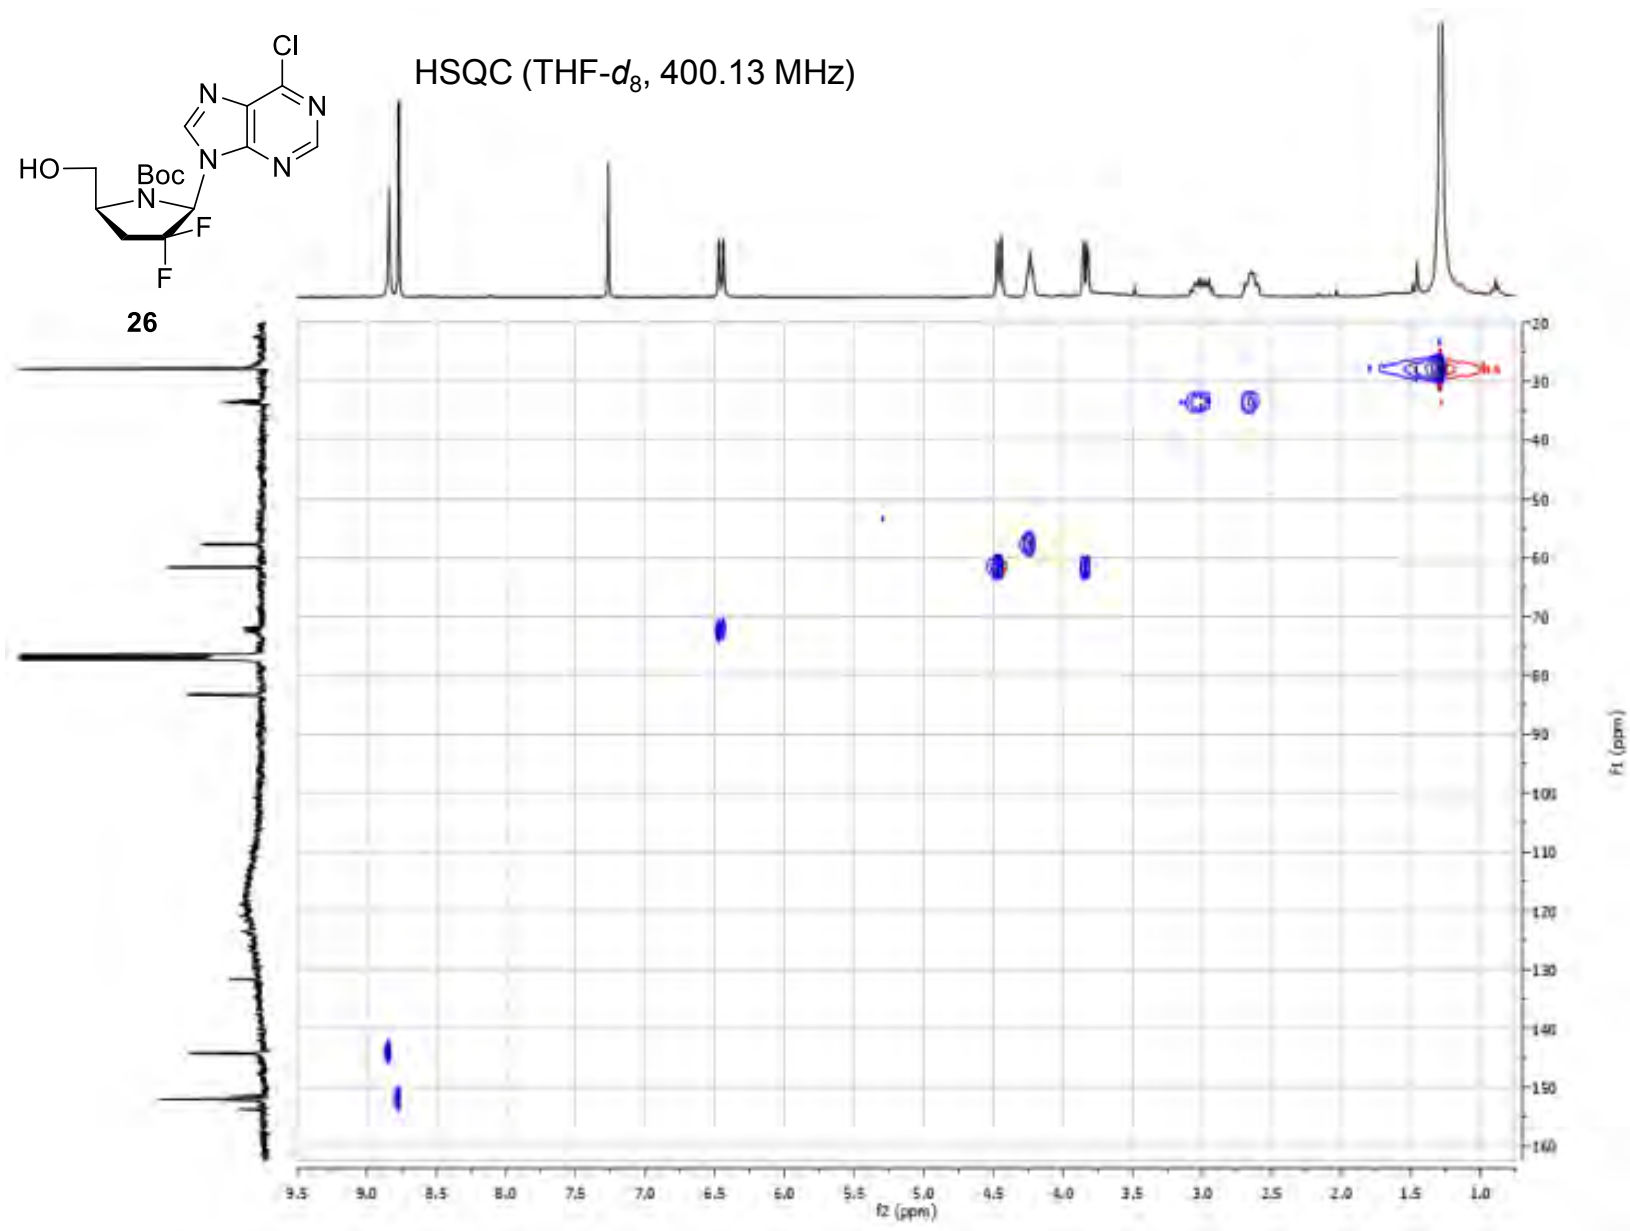



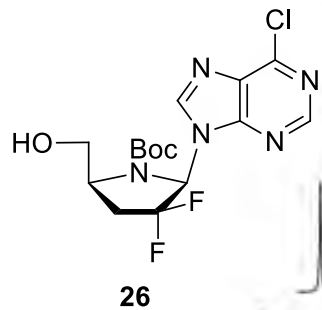

HMBC (THF-*d*<sub>8</sub>, 400.13 MHz)

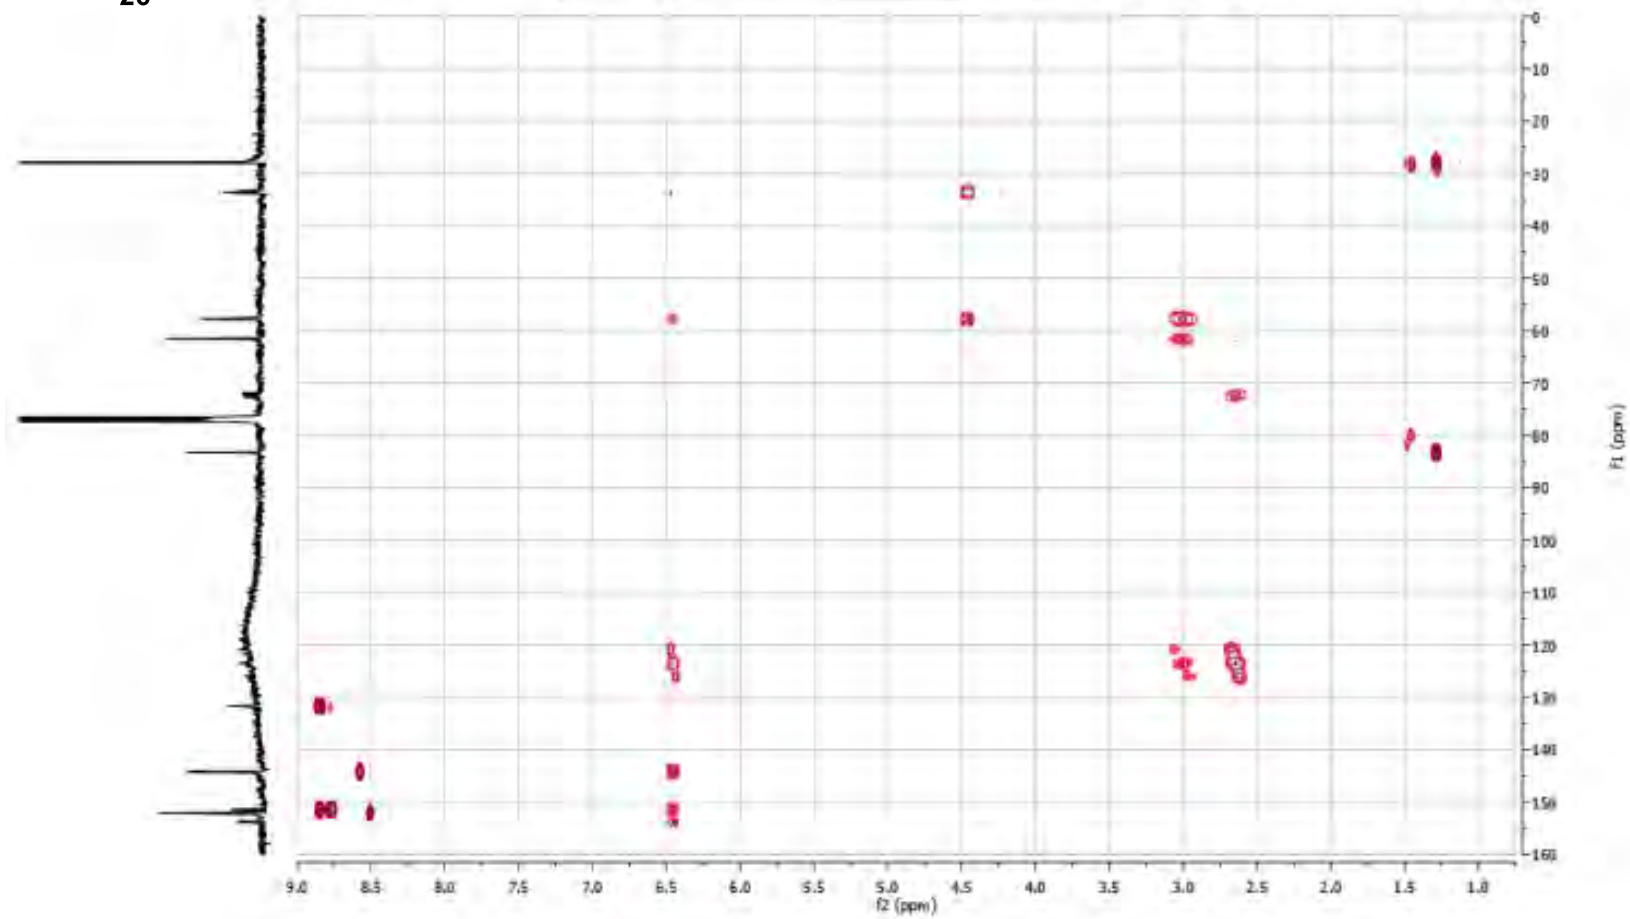

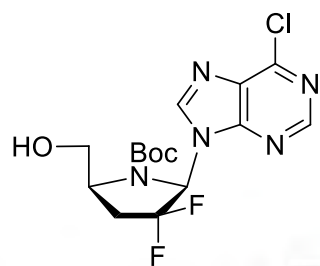

26

NOESY (THF-*d*<sub>8</sub>, 400.13 MHz)

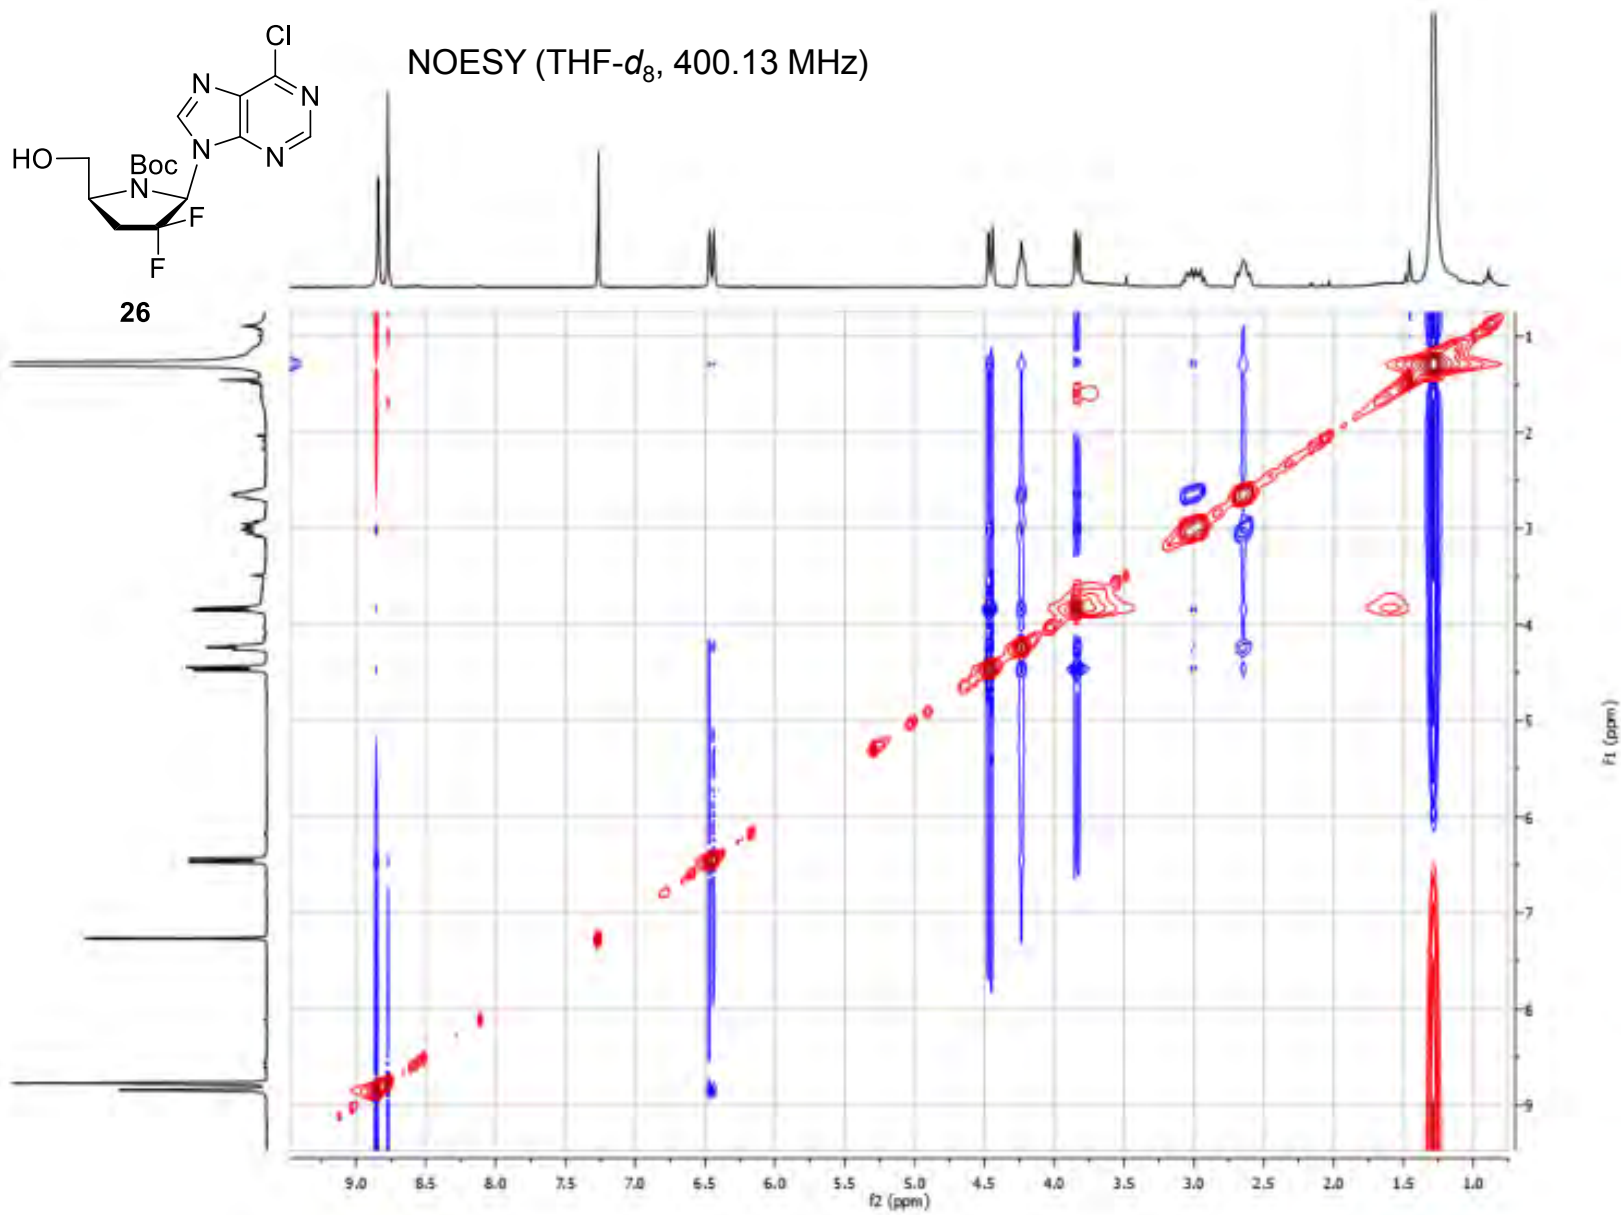

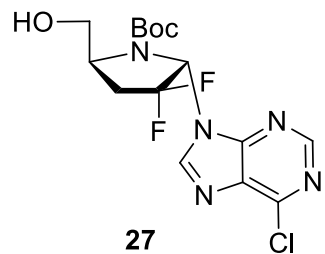

$^1\text{H NMR}$  ( $\text{CDCl}_3$ , 300.13 MHz)

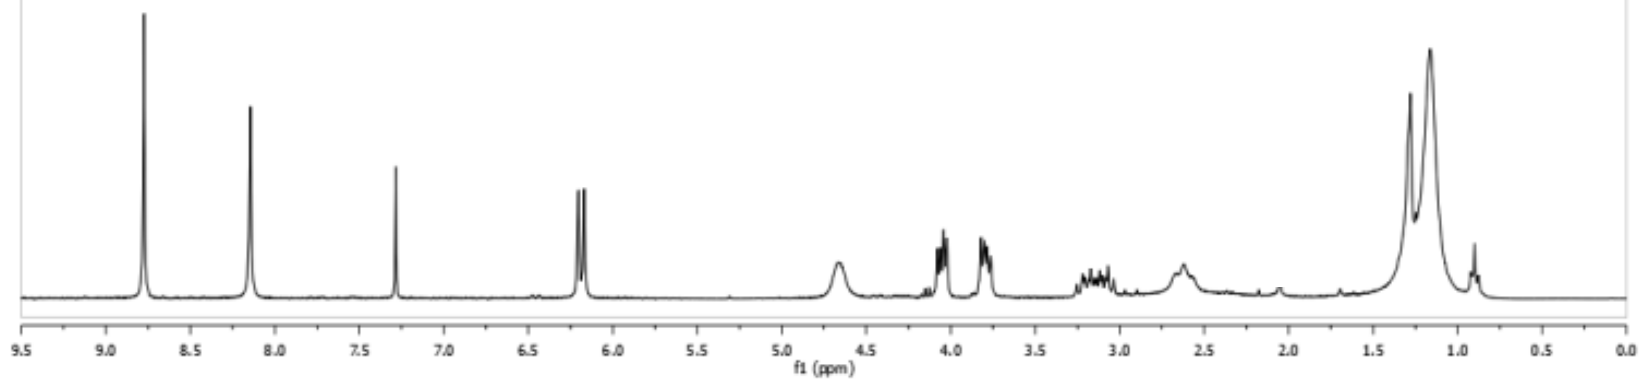

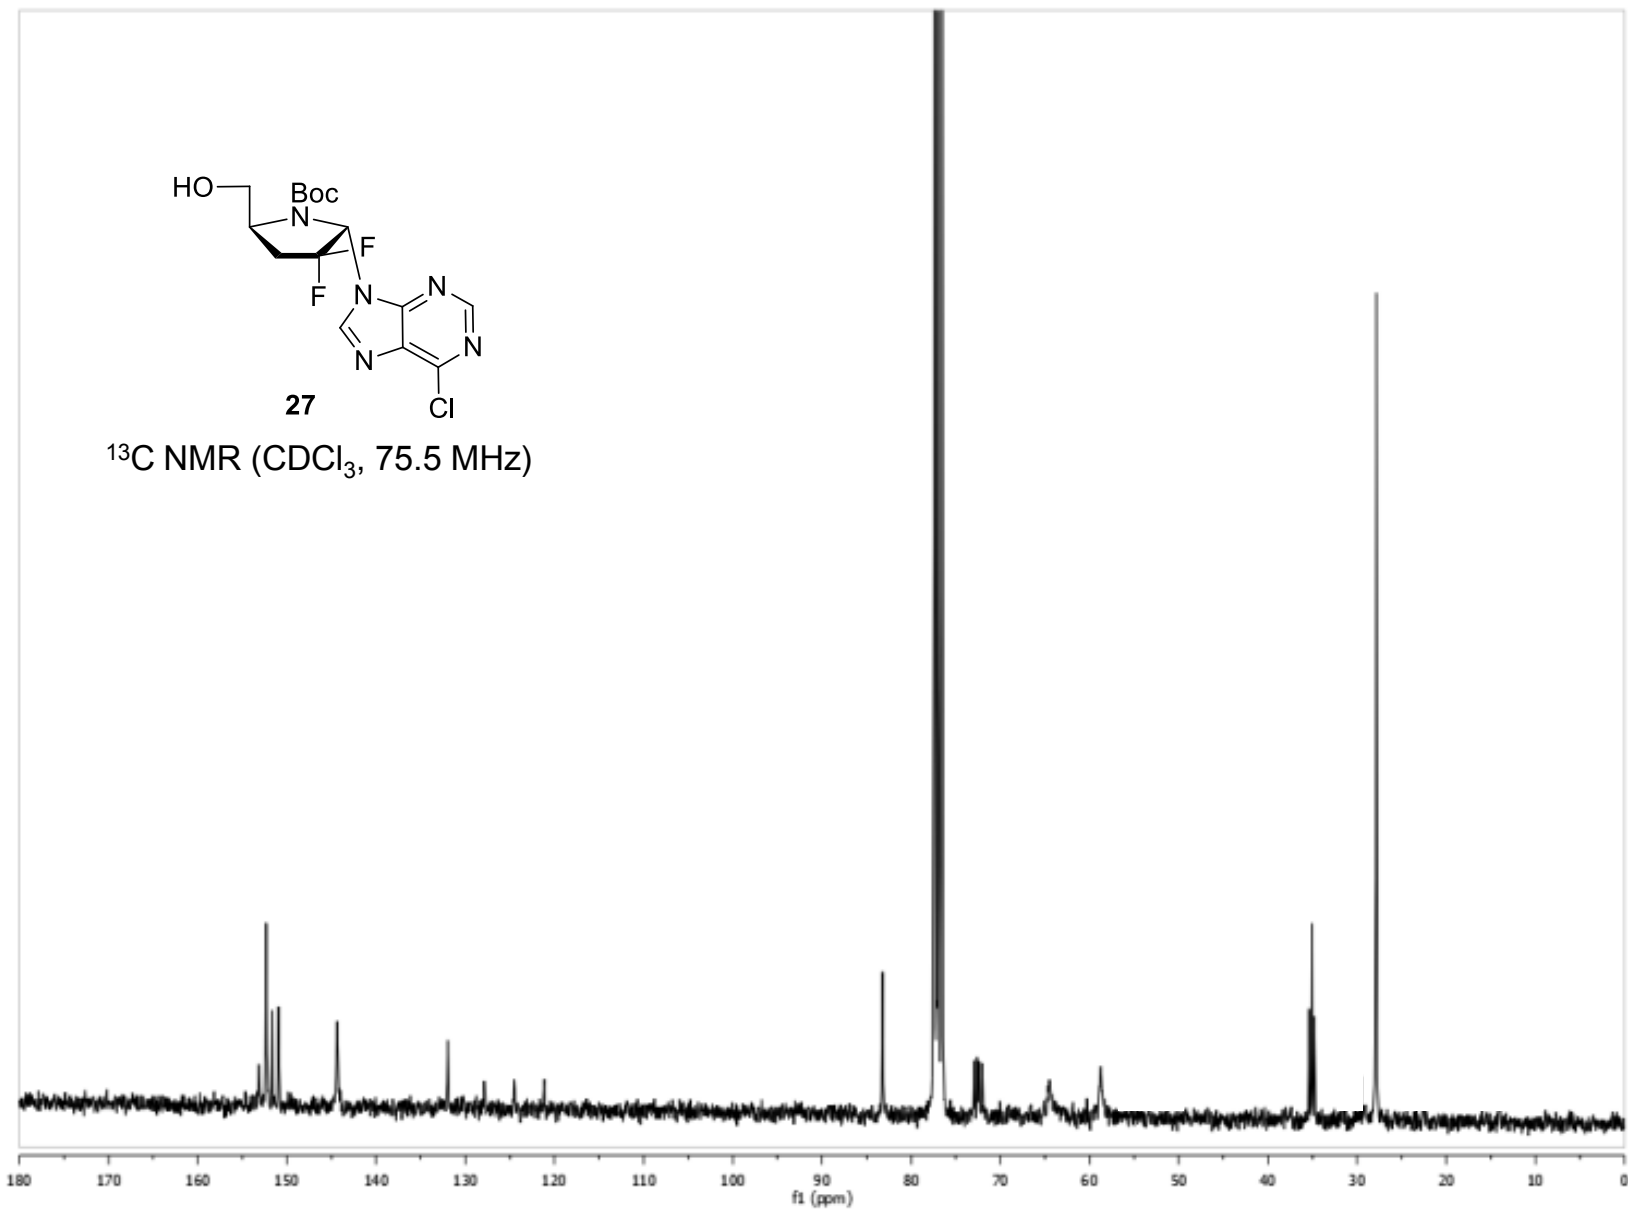

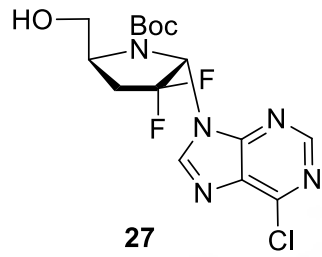

COSY (CDCl<sub>3</sub>, 300.13 MHz)

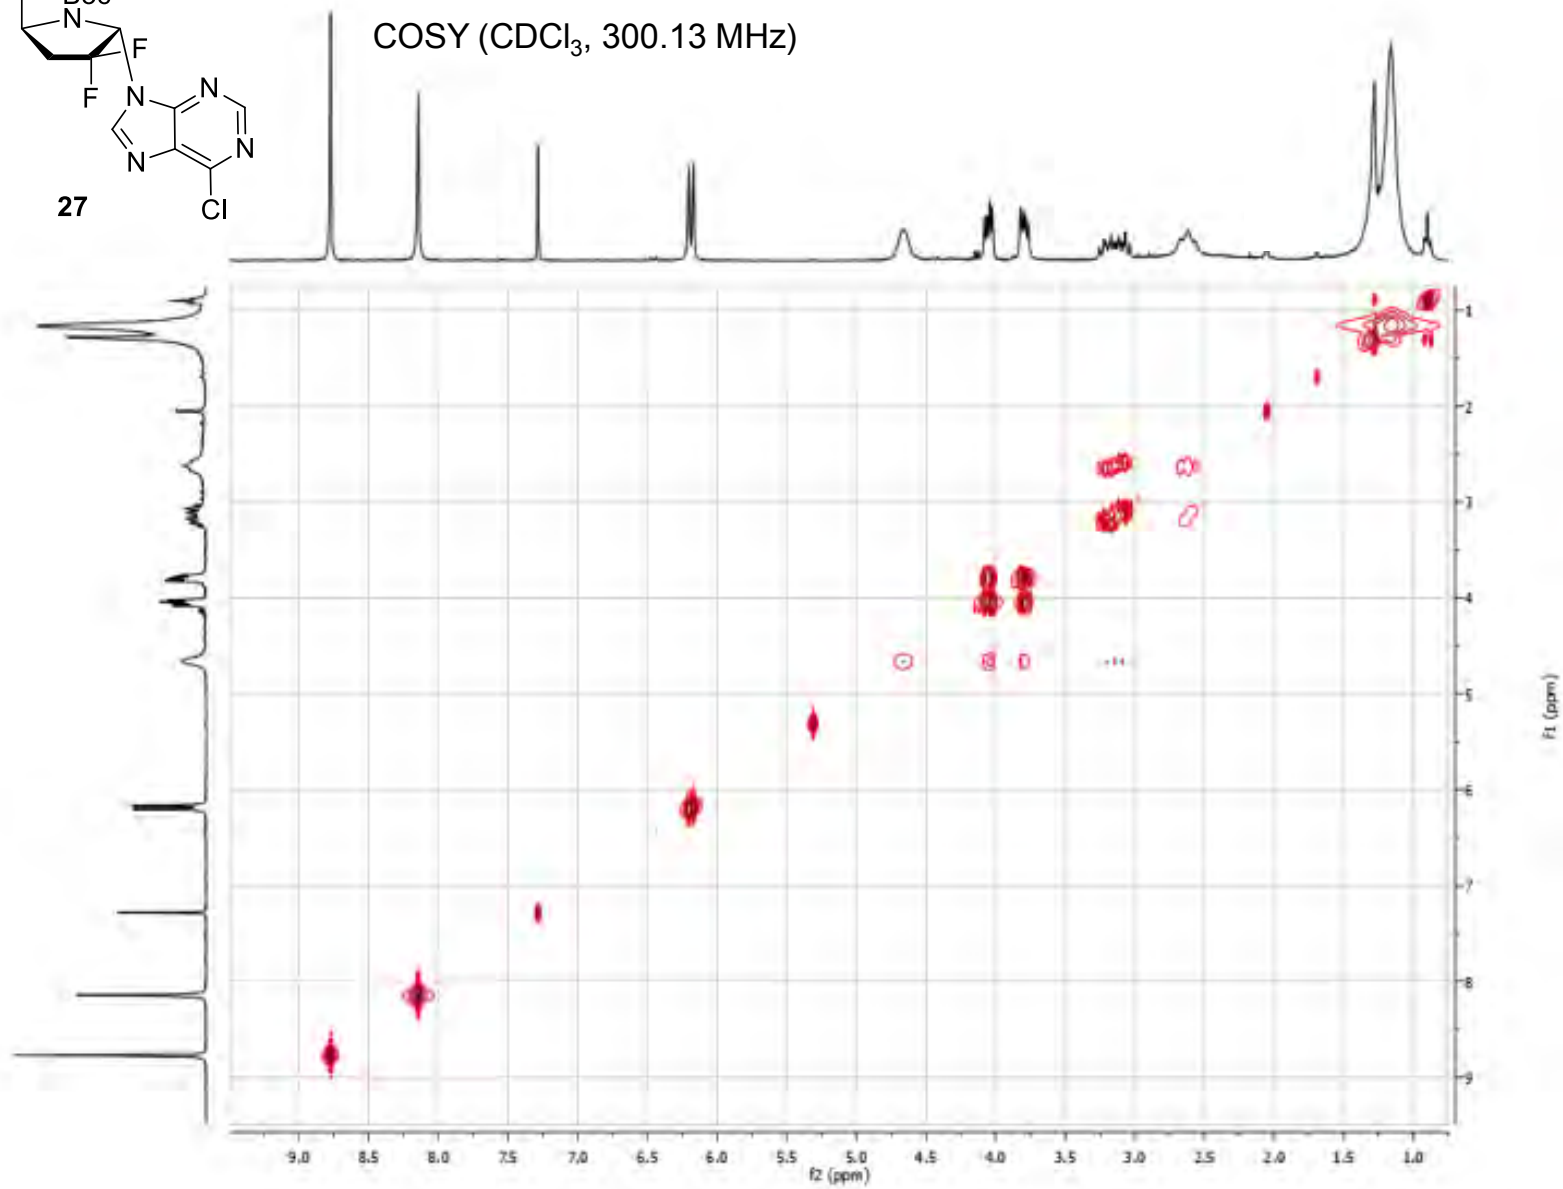

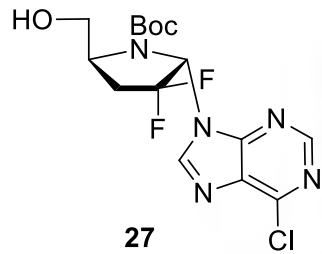

HSQC (CDCl<sub>3</sub>, 300.13 MHz)

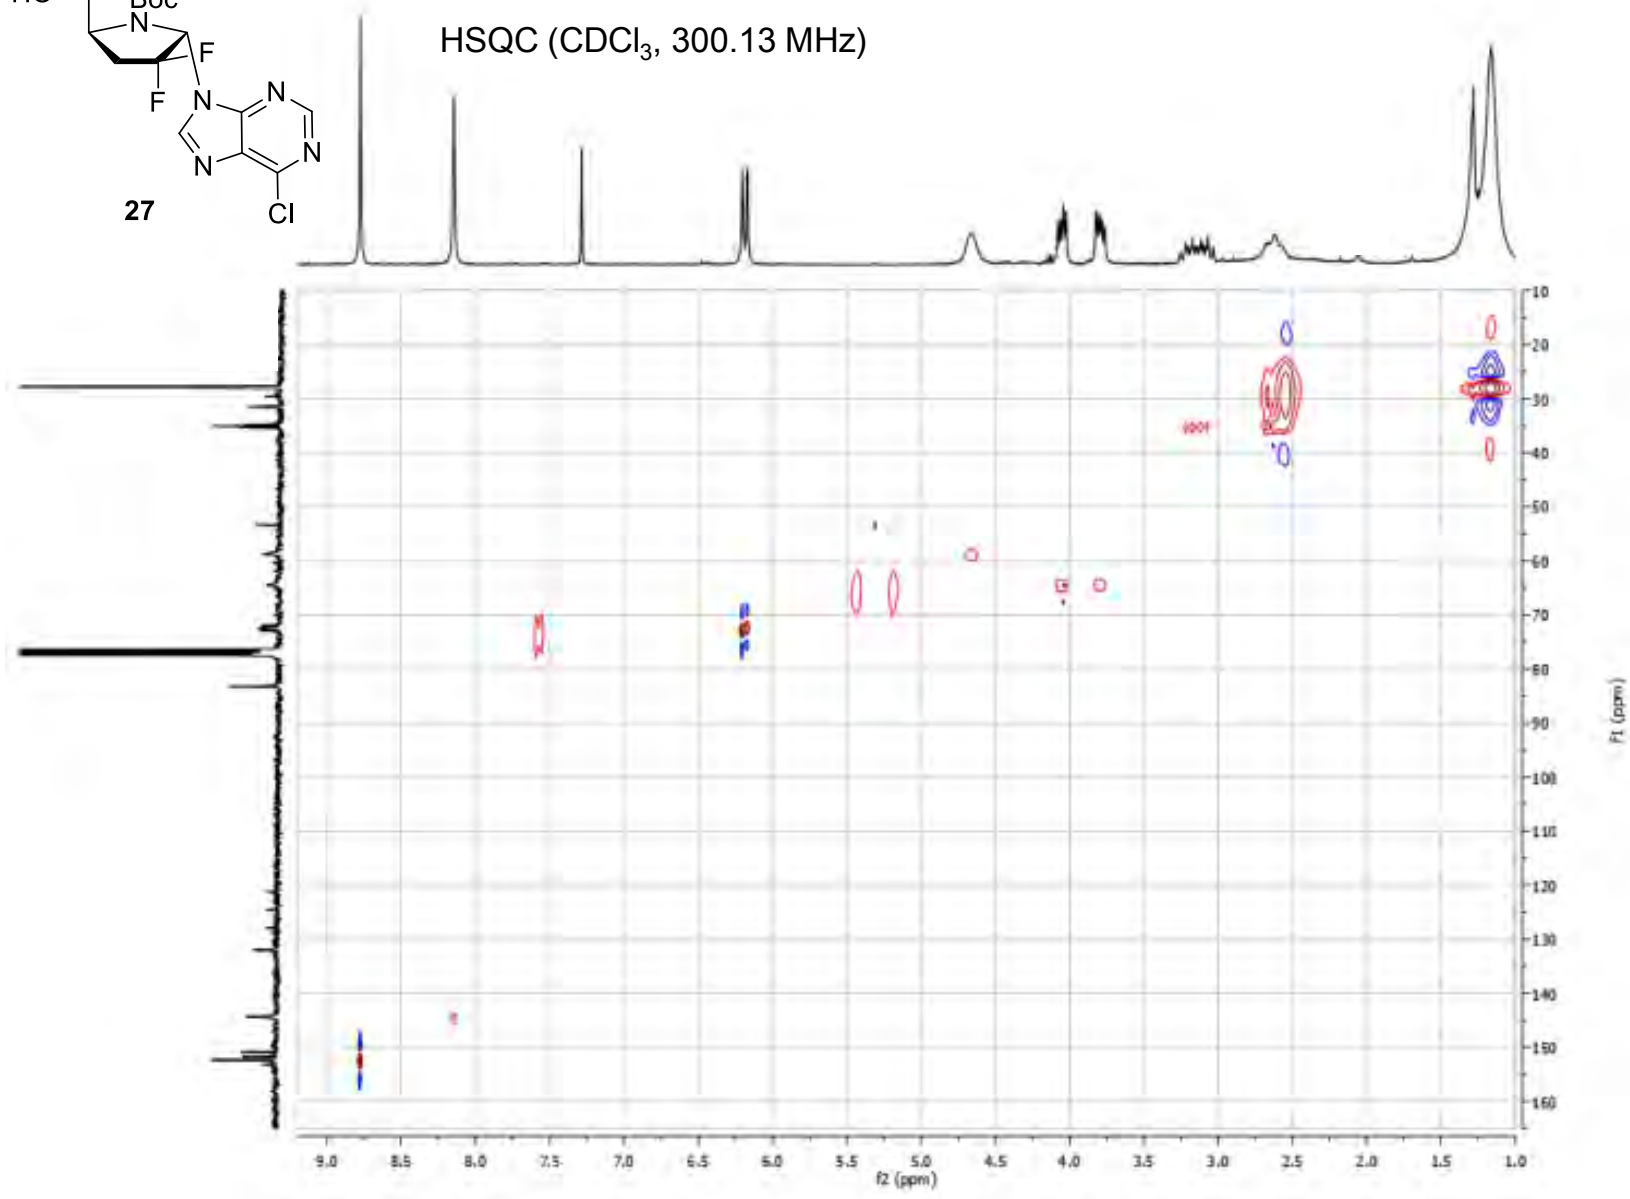

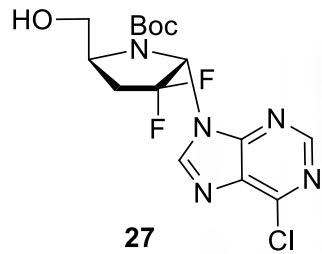

HMBC (CDCl<sub>3</sub>, 300.13 MHz)

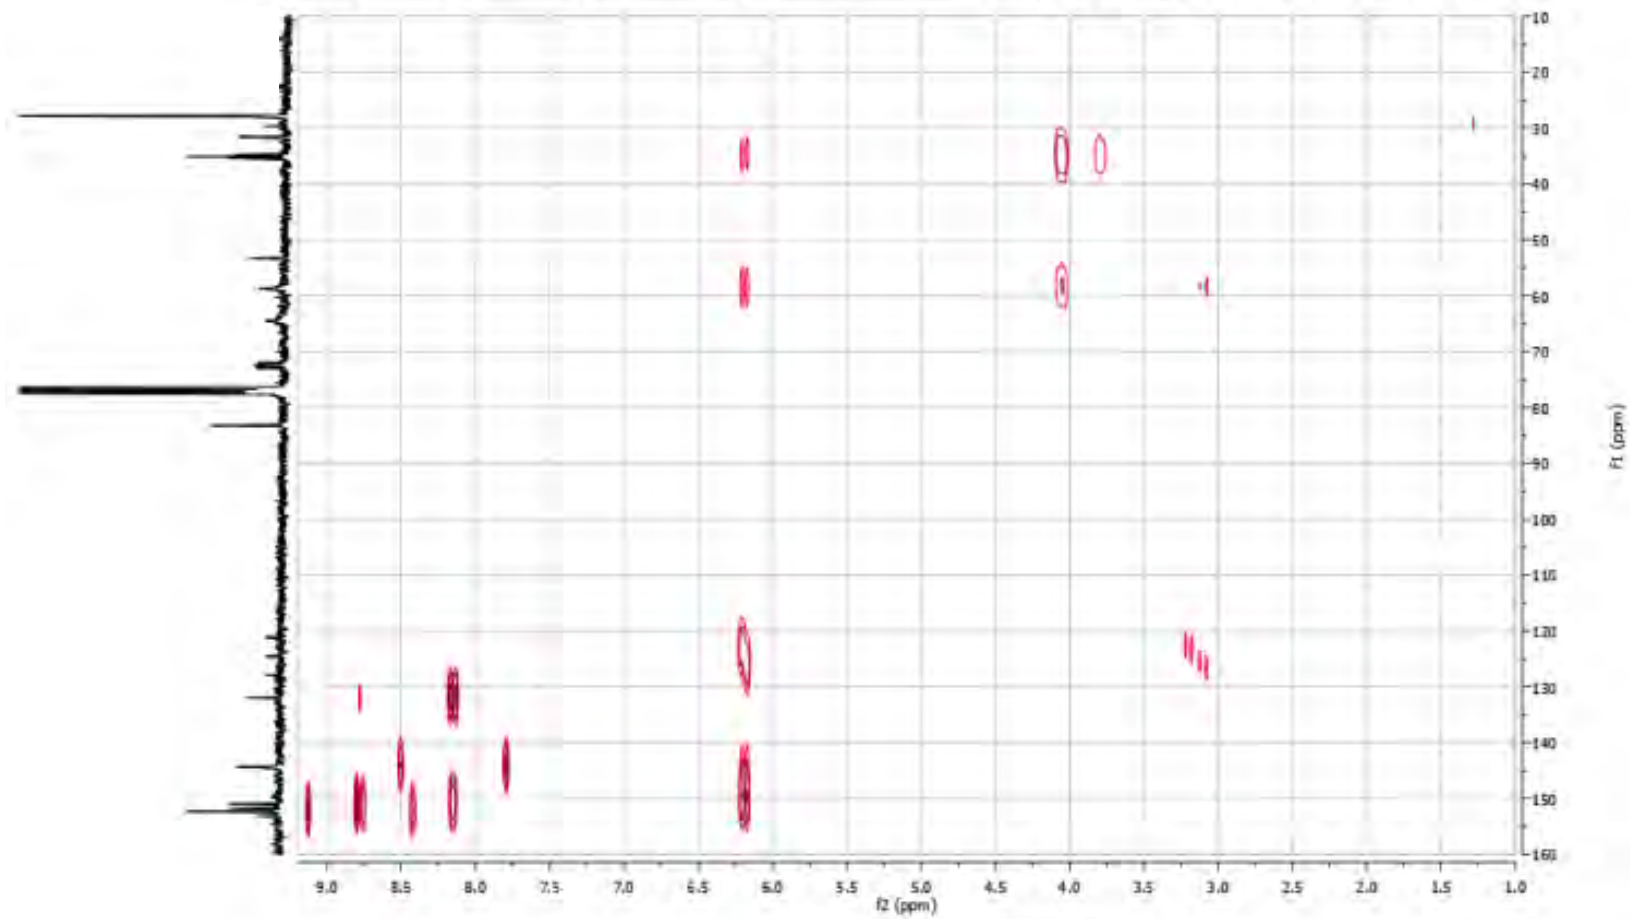

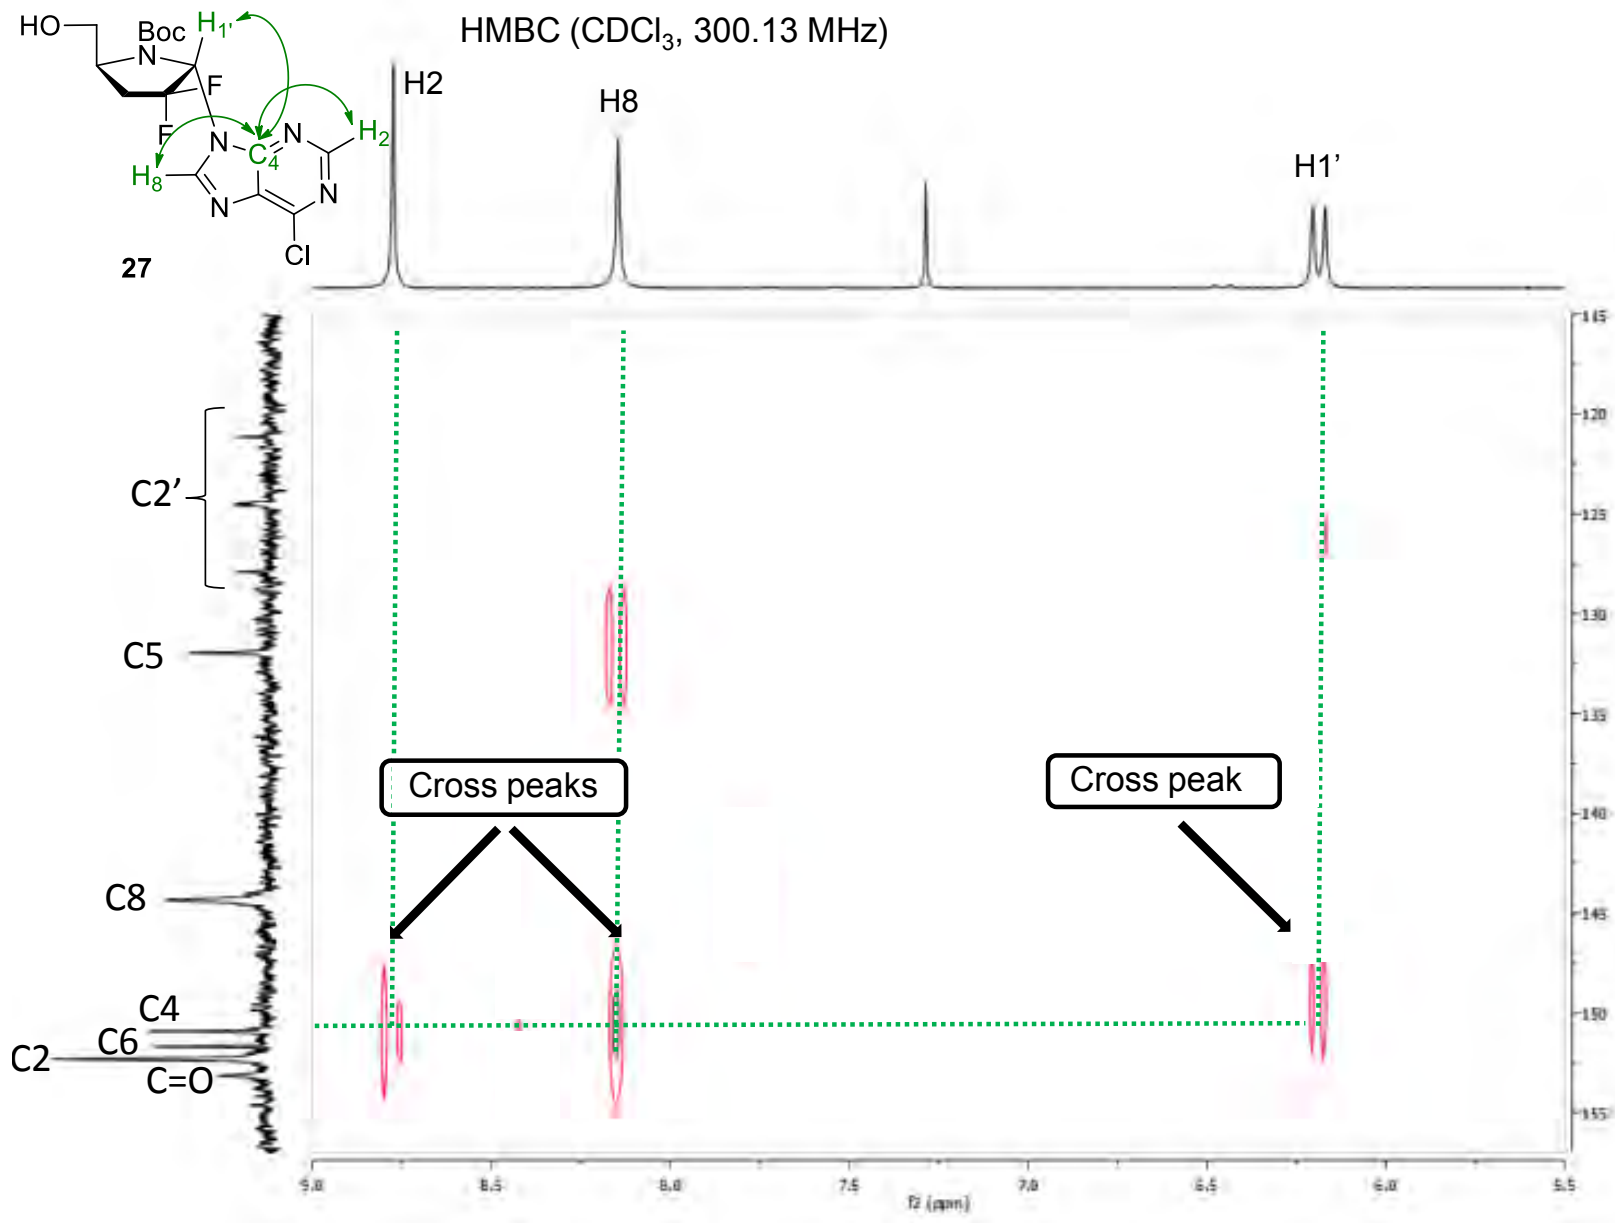



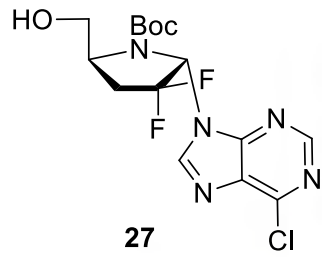

NOESY (CDCl<sub>3</sub>, 300.13 MHz)

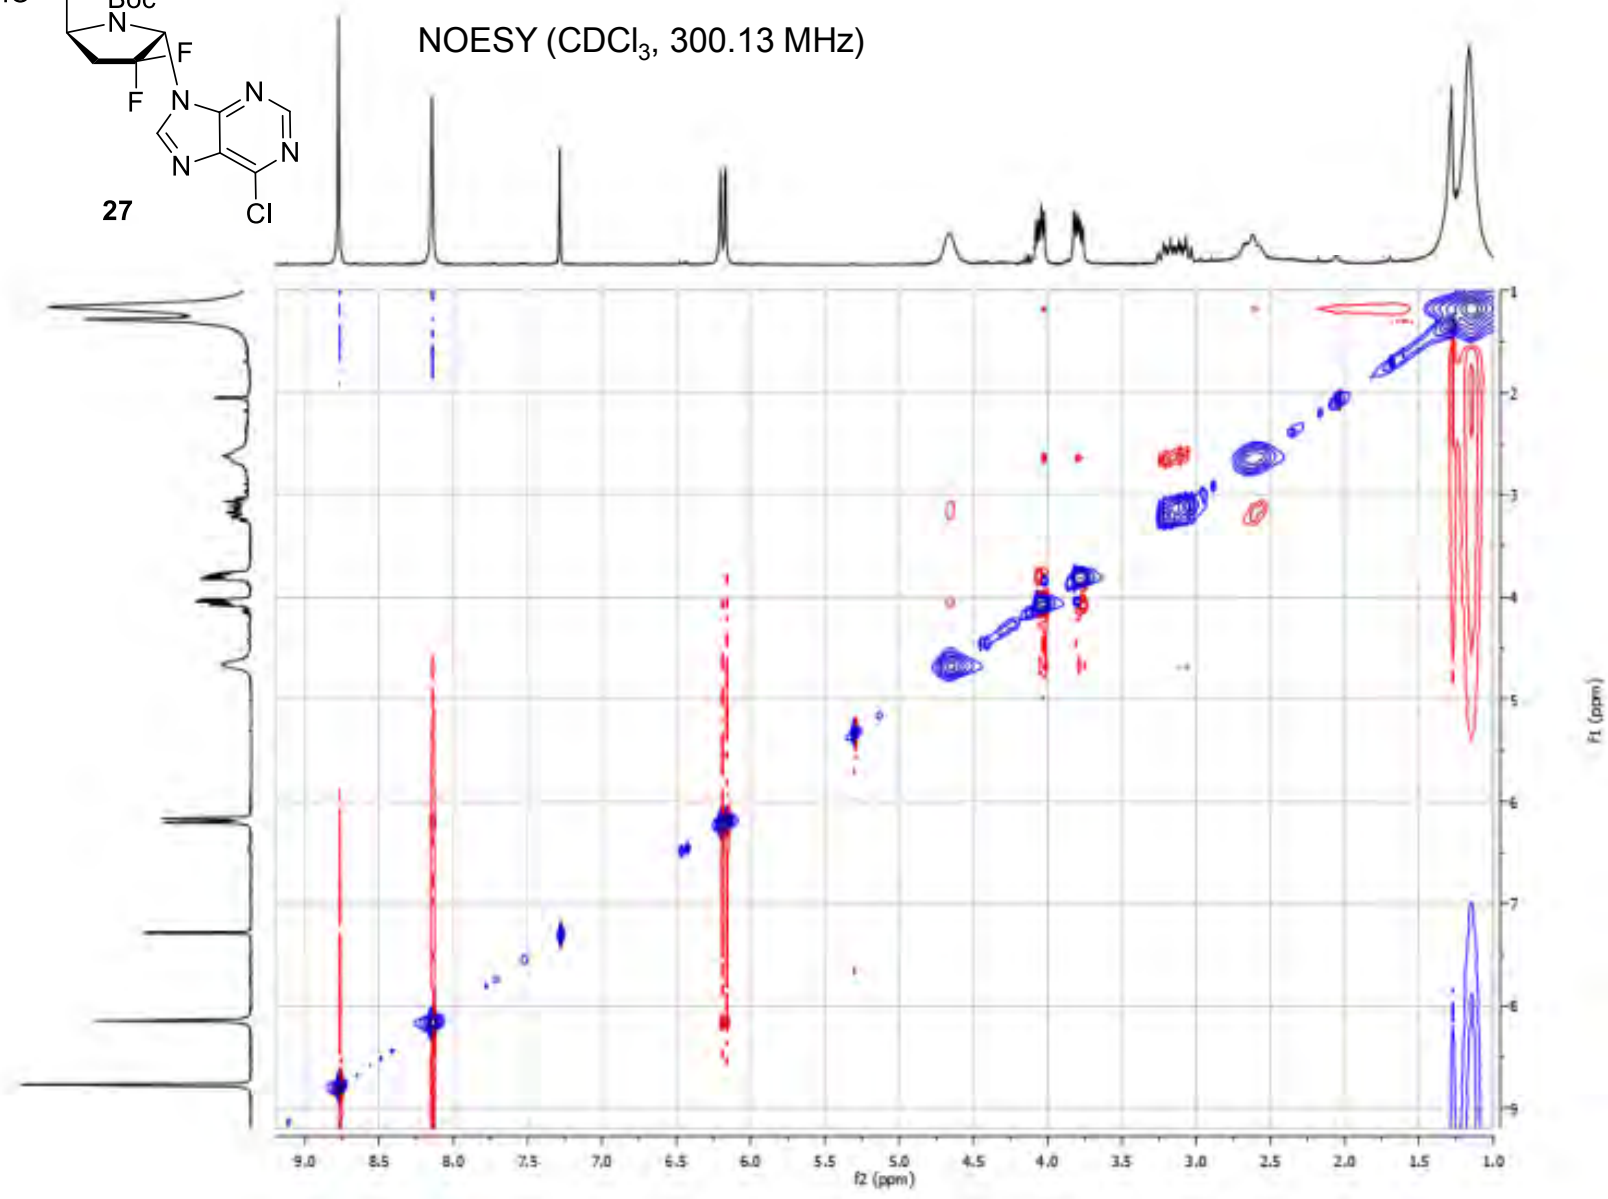

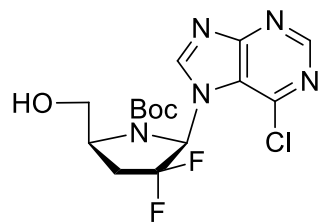

28

<sup>1</sup>H NMR (CDCl<sub>3</sub>, 400.13 MHz)

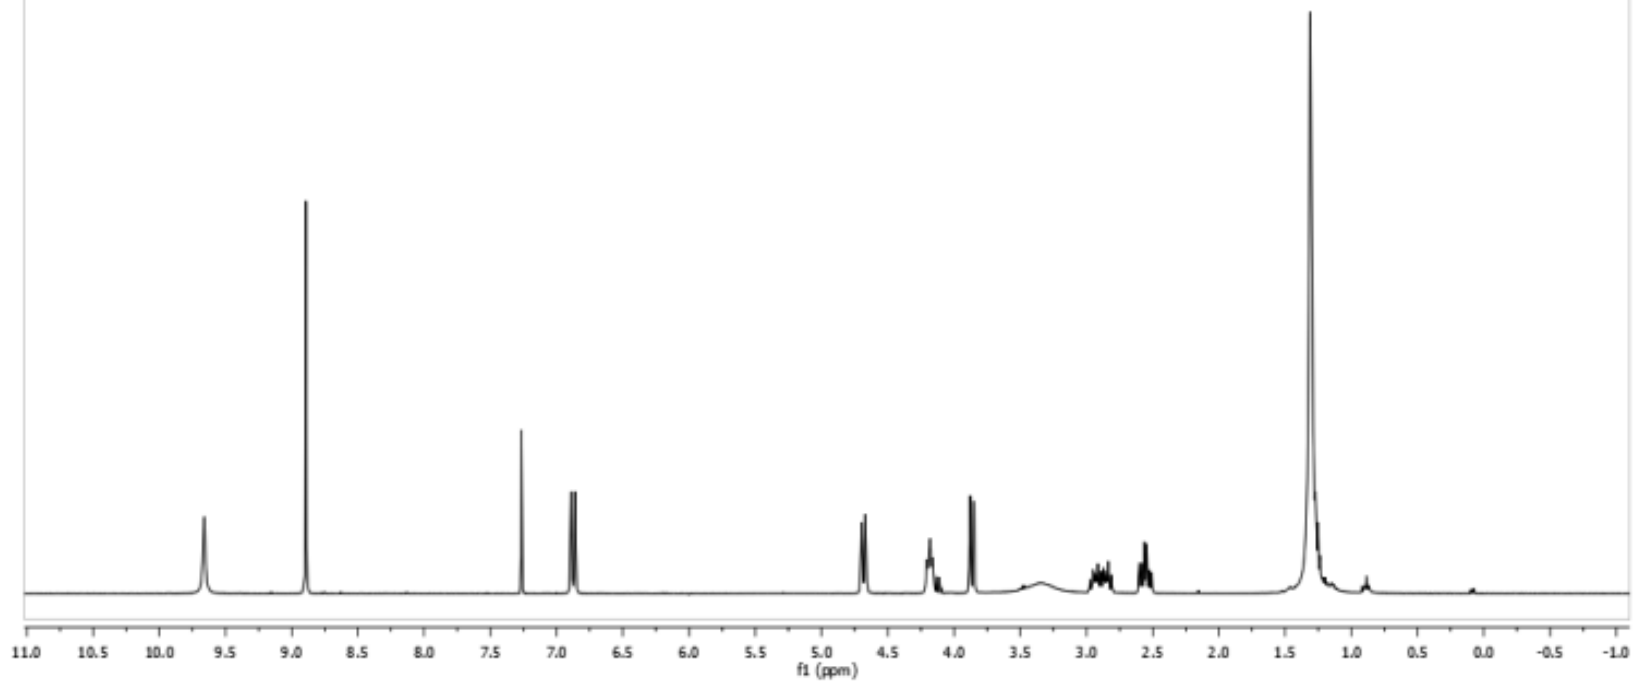

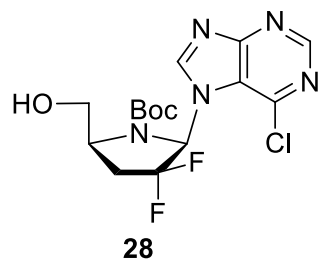

$^{13}\text{C}$  NMR ( $\text{CDCl}_3$ , 100.6 MHz)

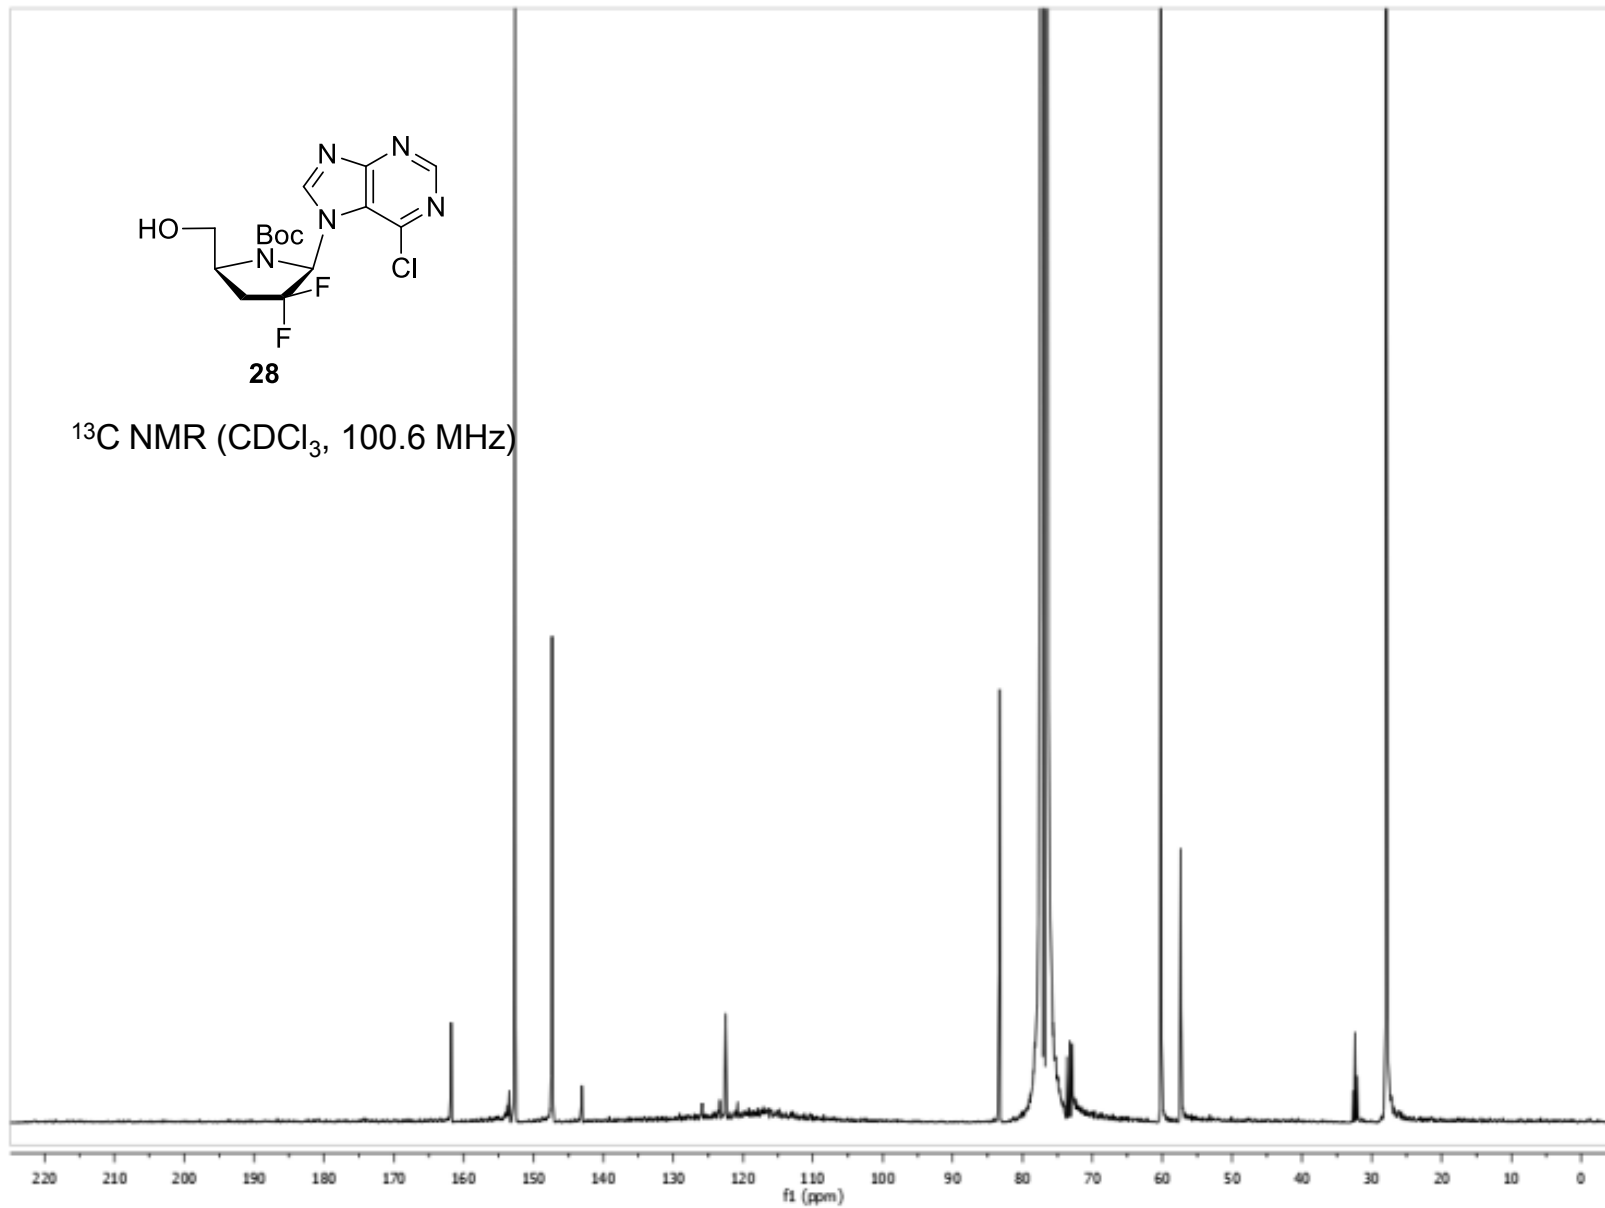

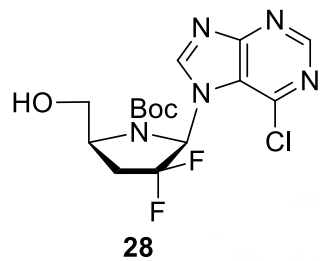

COSY (CDCl<sub>3</sub>, 400.13 MHz)

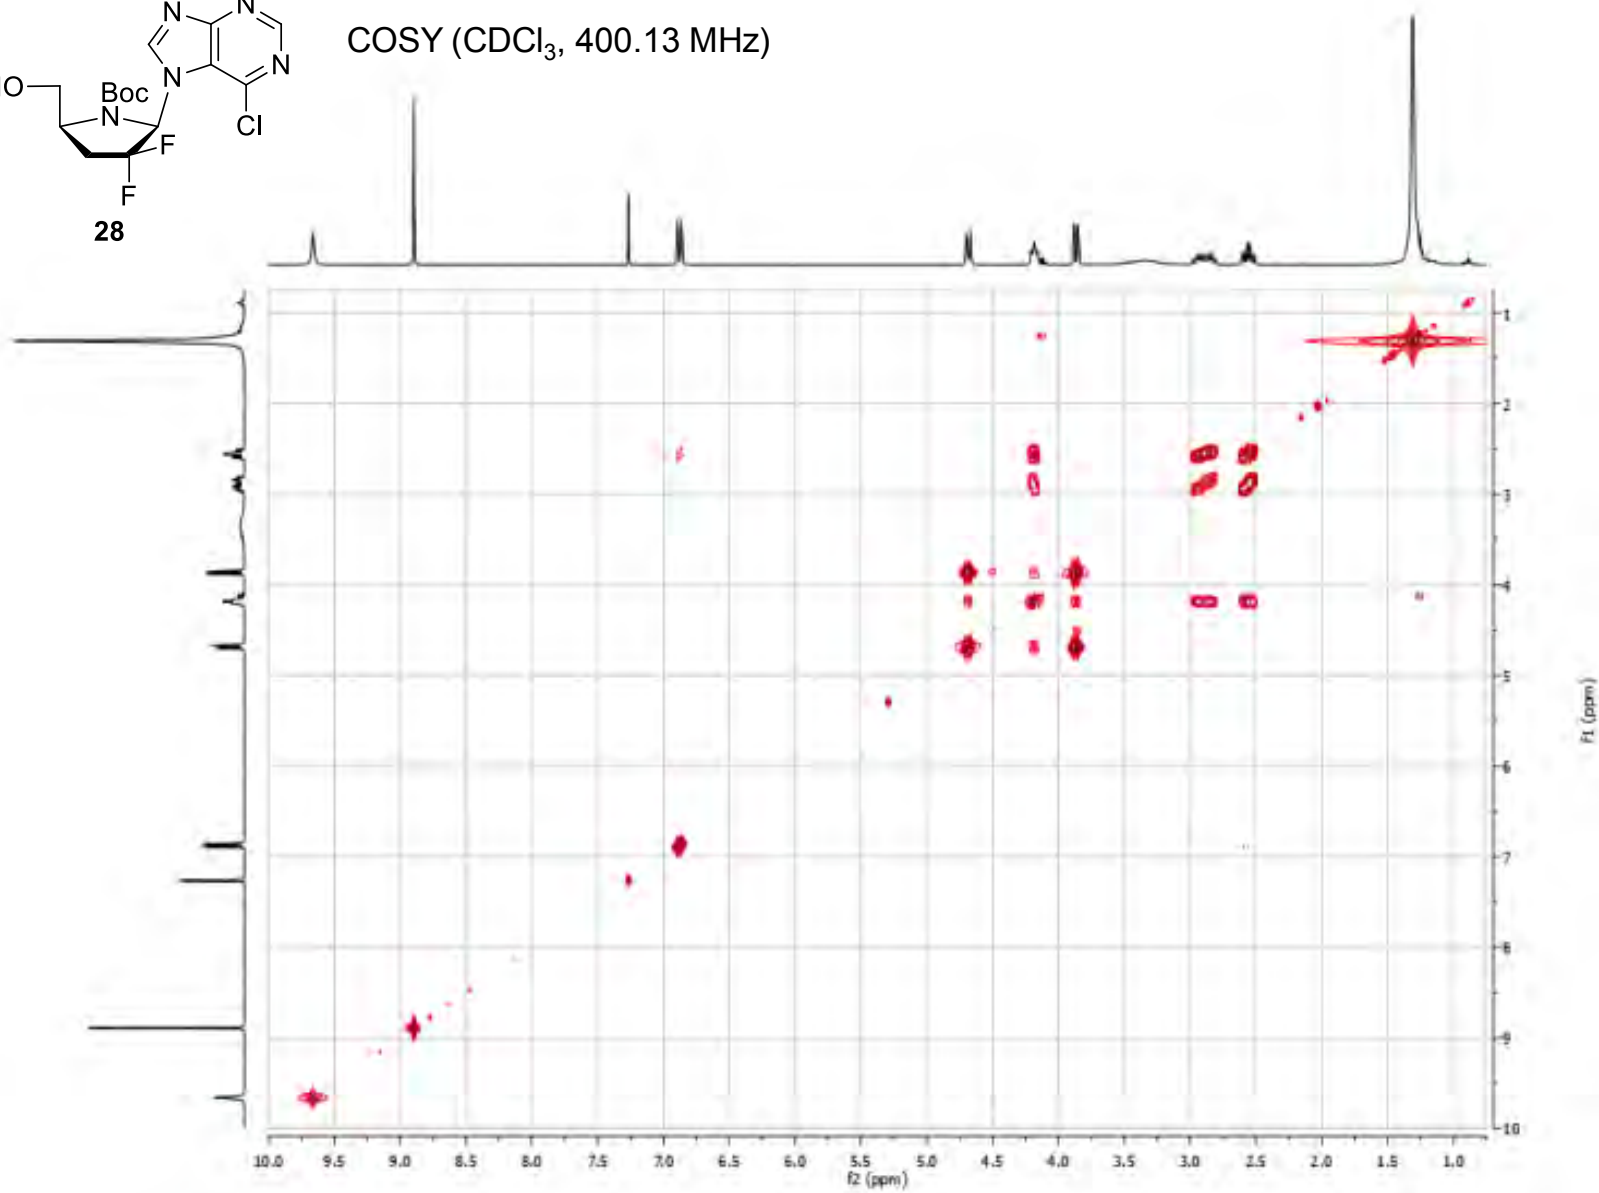

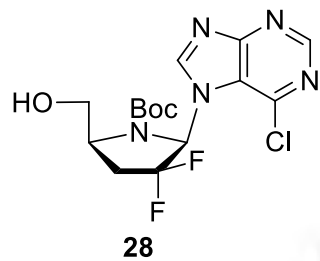

HSQC (CDCl<sub>3</sub>, 400.13 MHz)

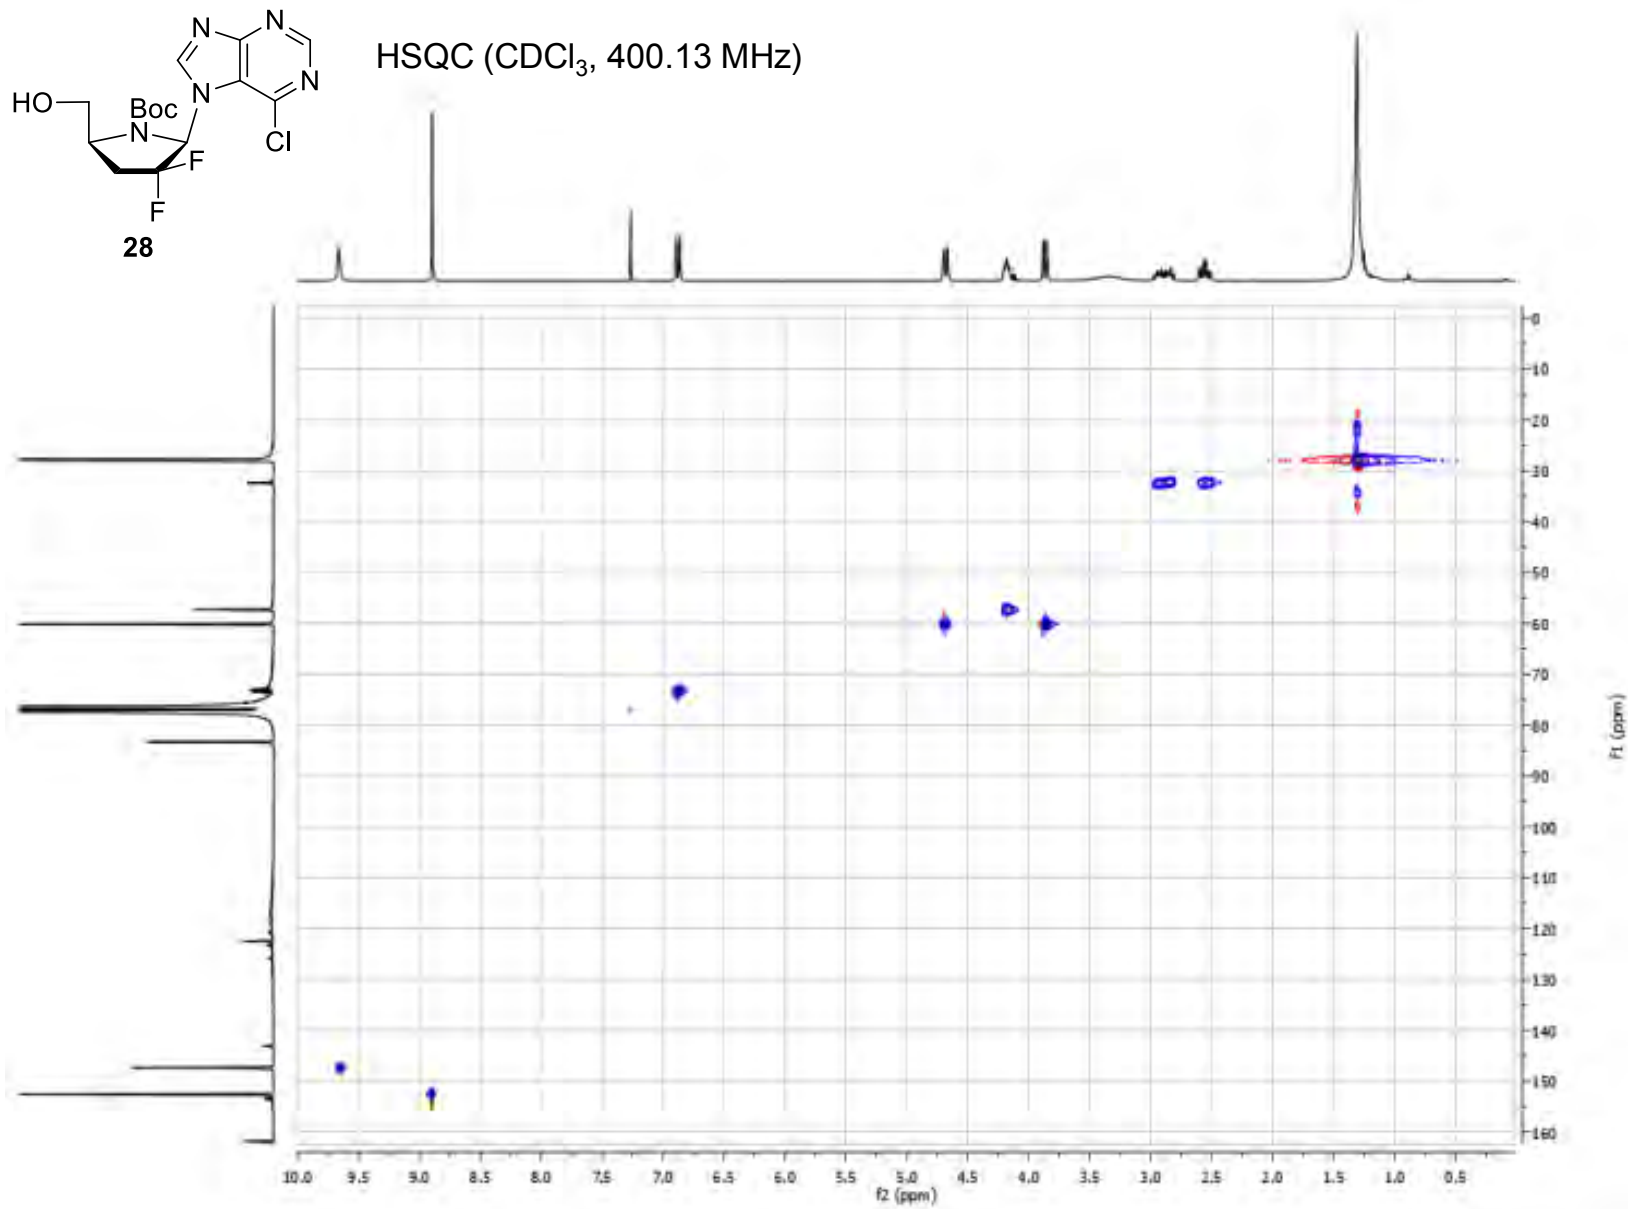

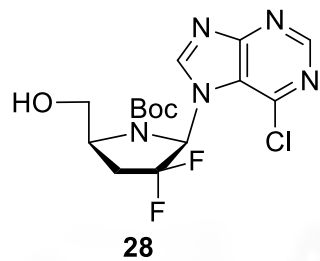

HMBC (CDCl<sub>3</sub>, 400.13 MHz)

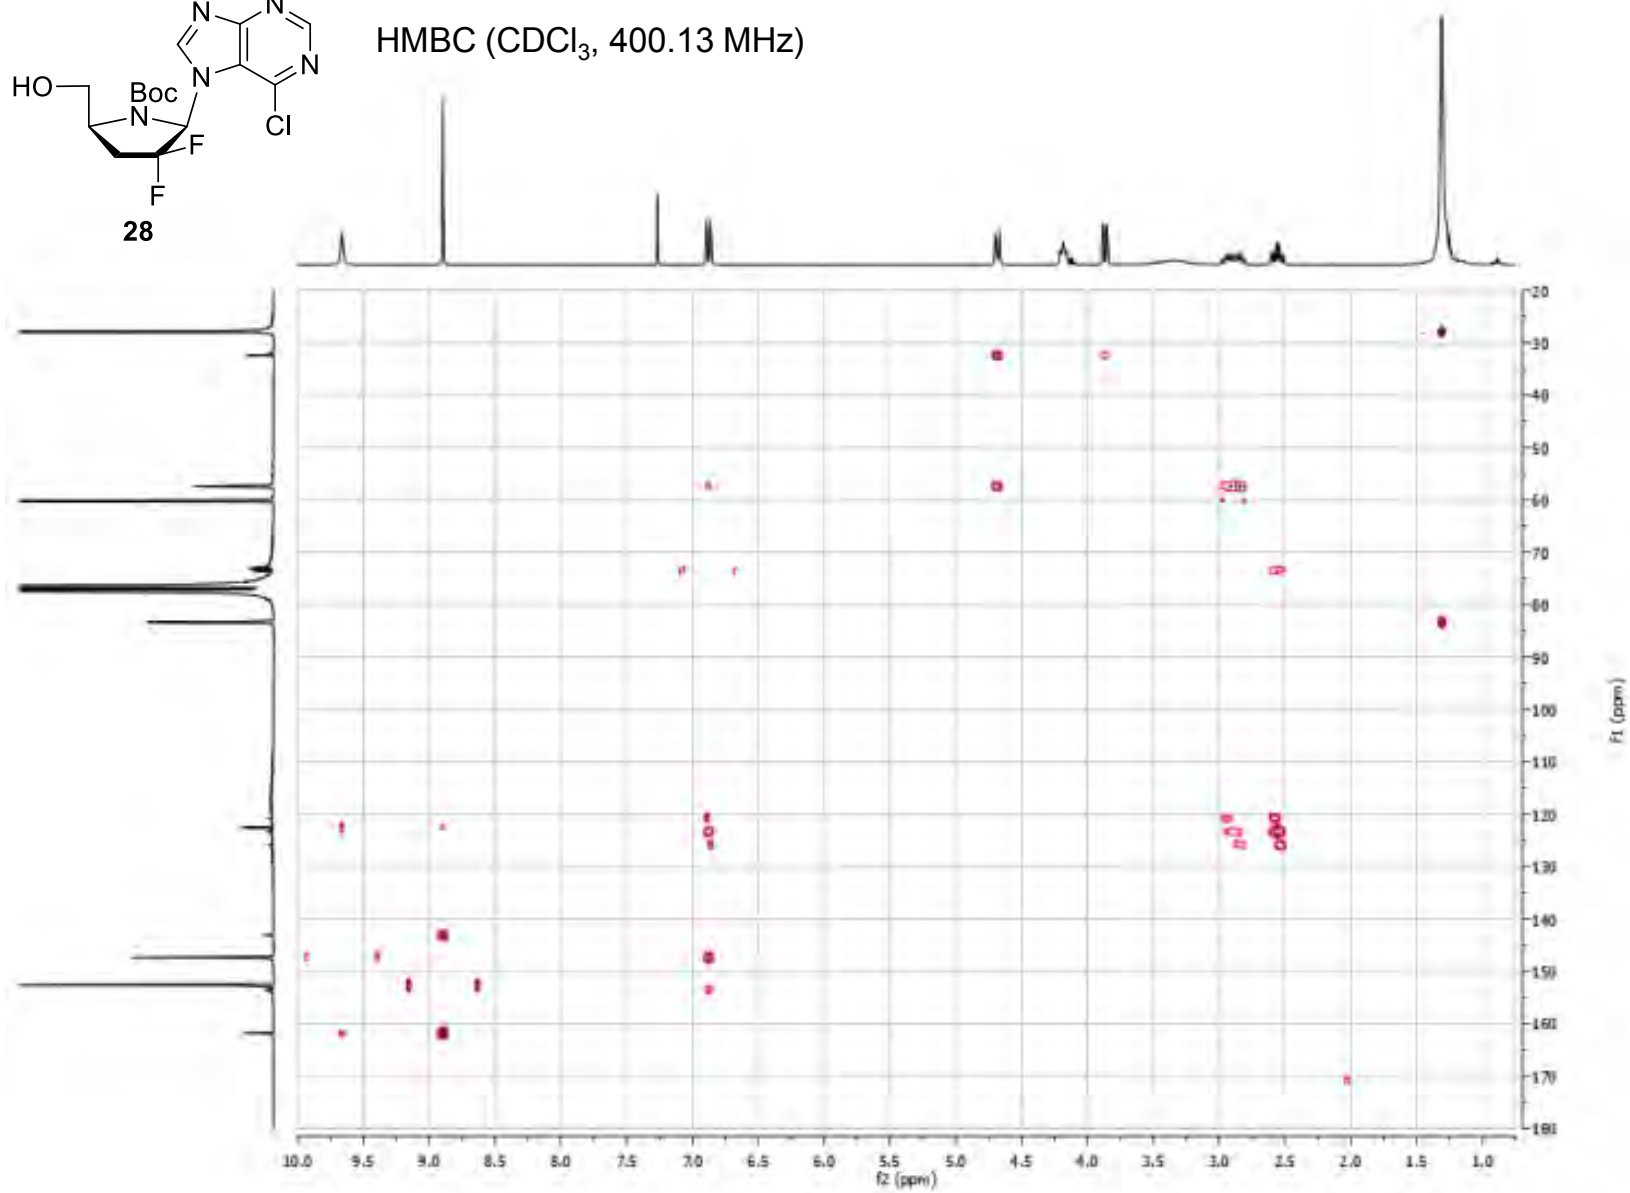

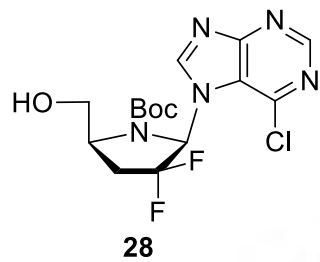

NOESY (CDCl<sub>3</sub>, 400.13 MHz)

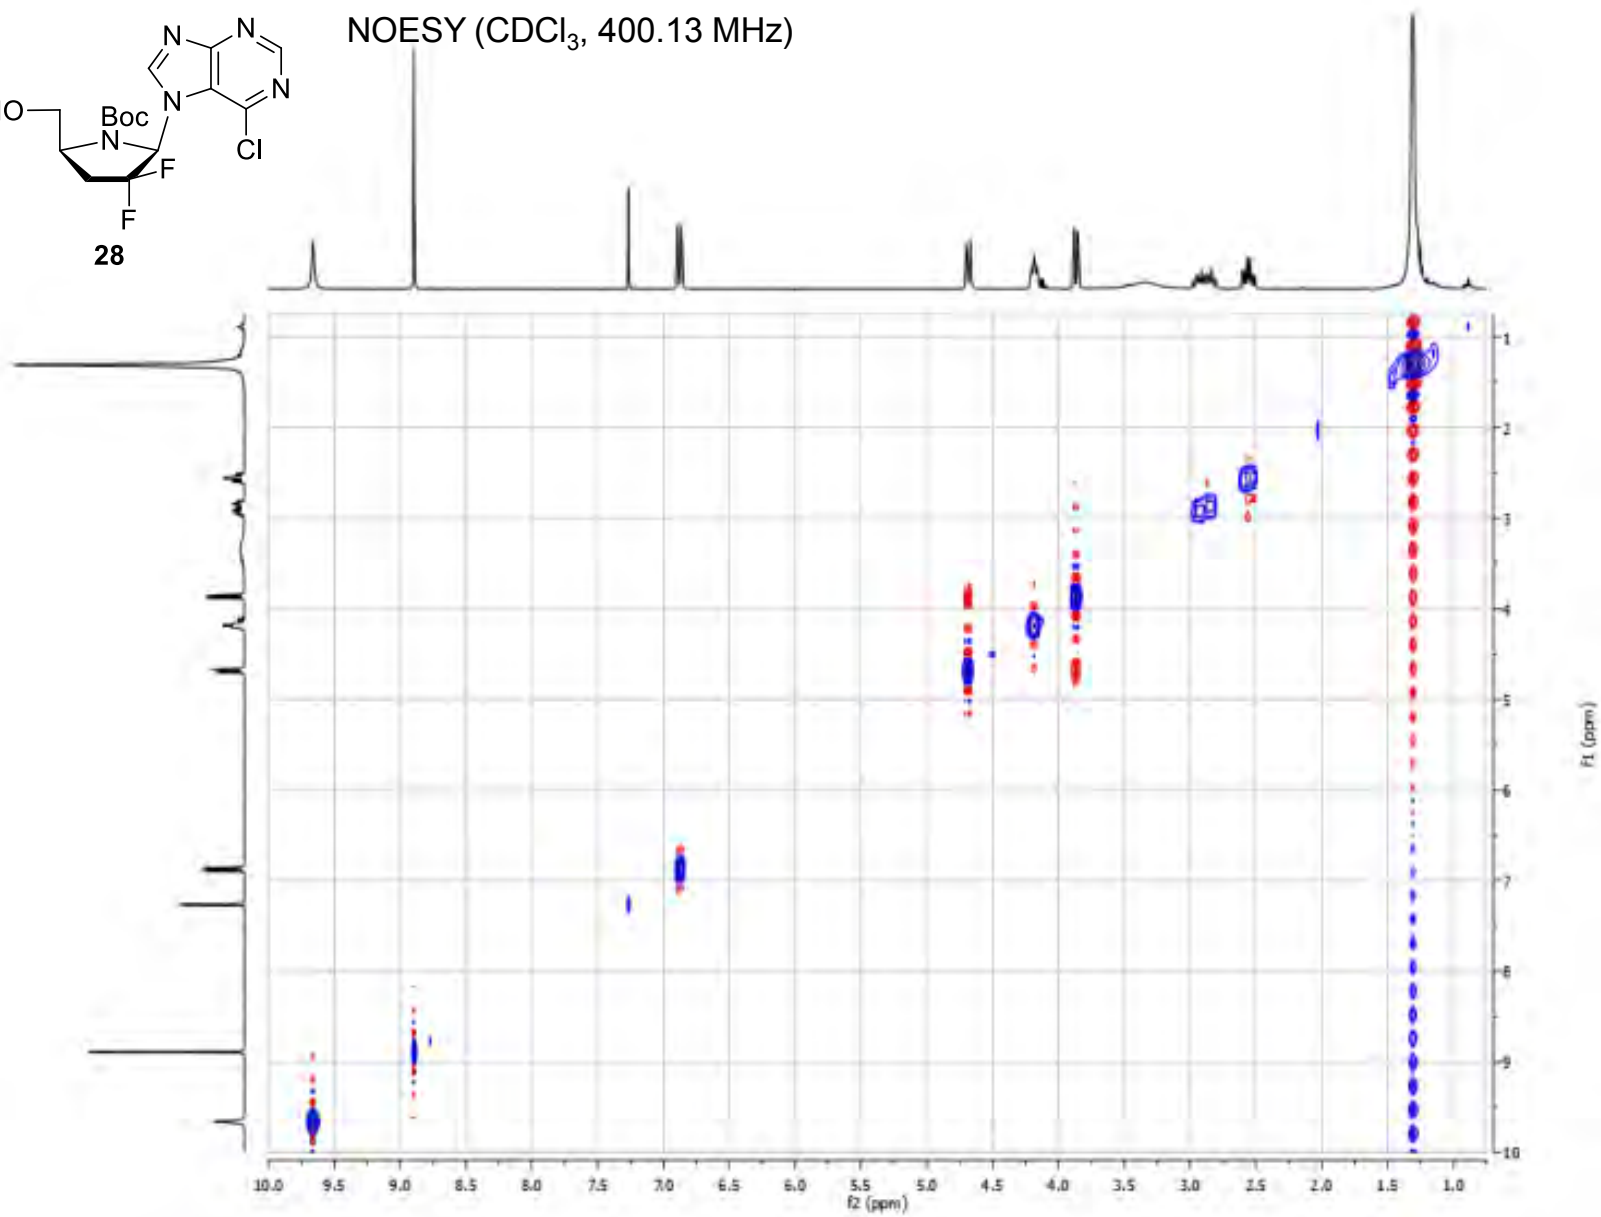

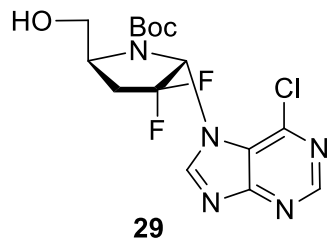

$^1\text{H}$  NMR ( $\text{CDCl}_3$ , 400.13 MHz)

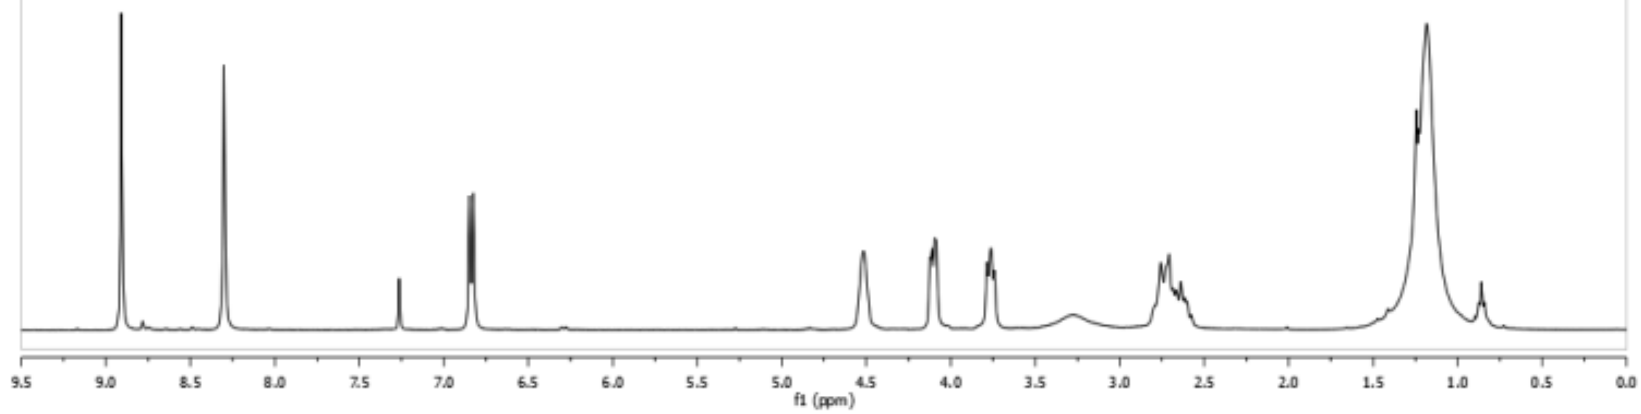



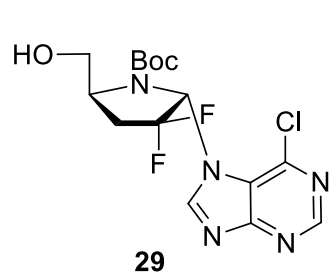

$^{13}\text{C}$  NMR ( $\text{CDCl}_3$ , 100.6 MHz)

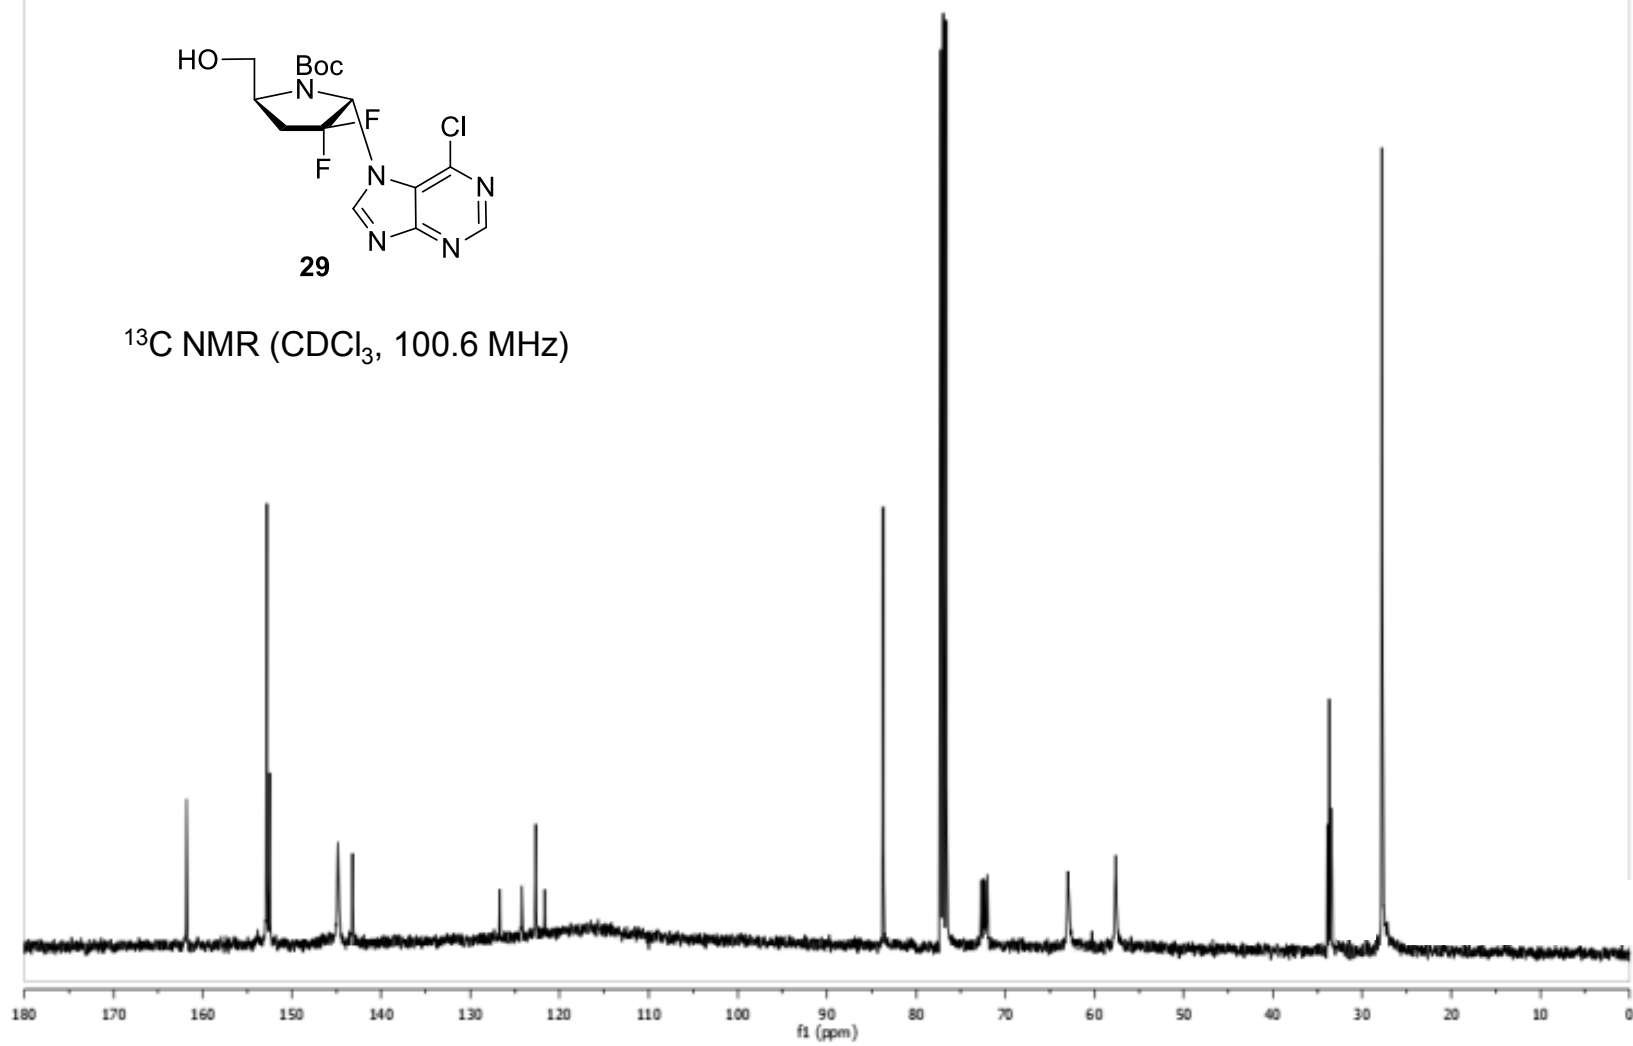

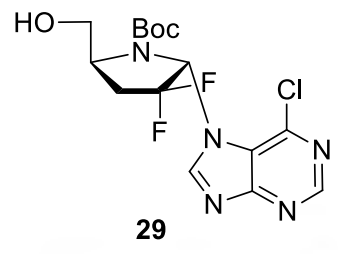

COSY (CDCl<sub>3</sub>, 400.13 MHz)

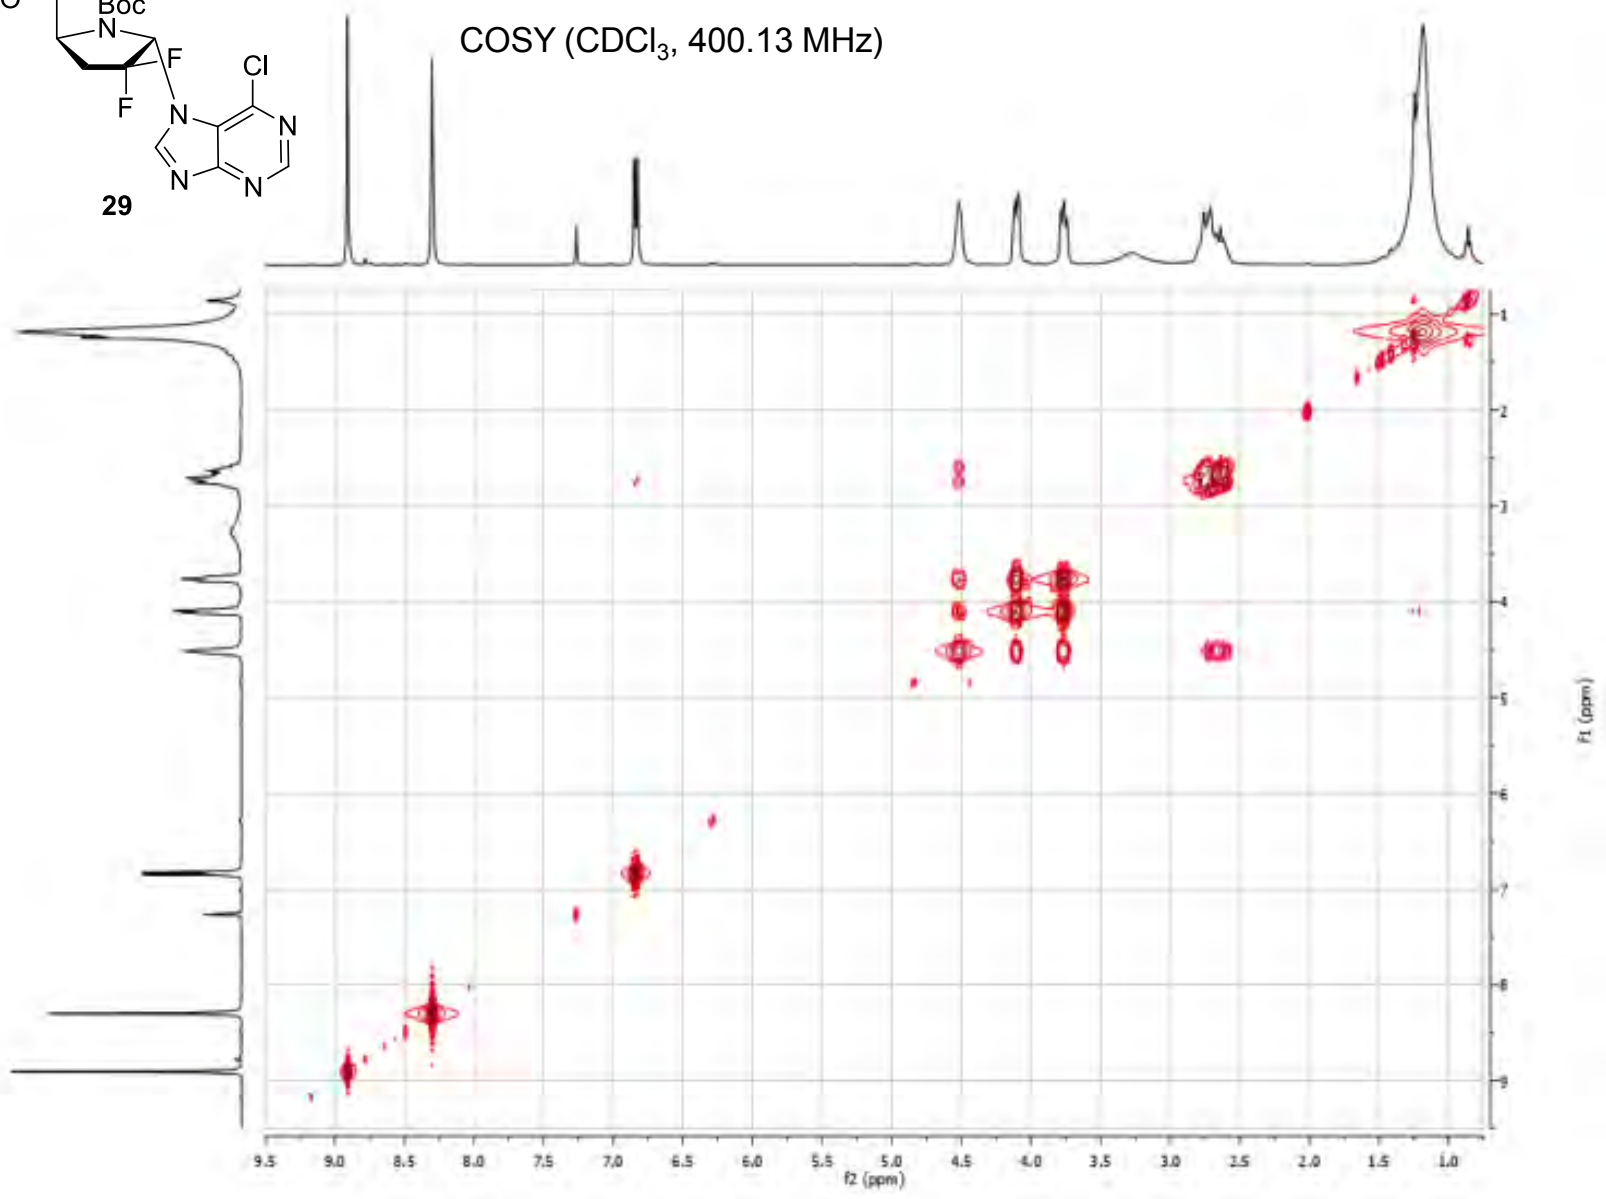

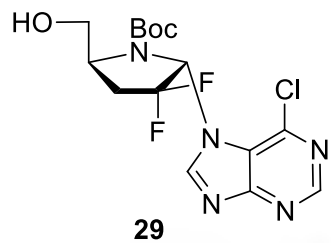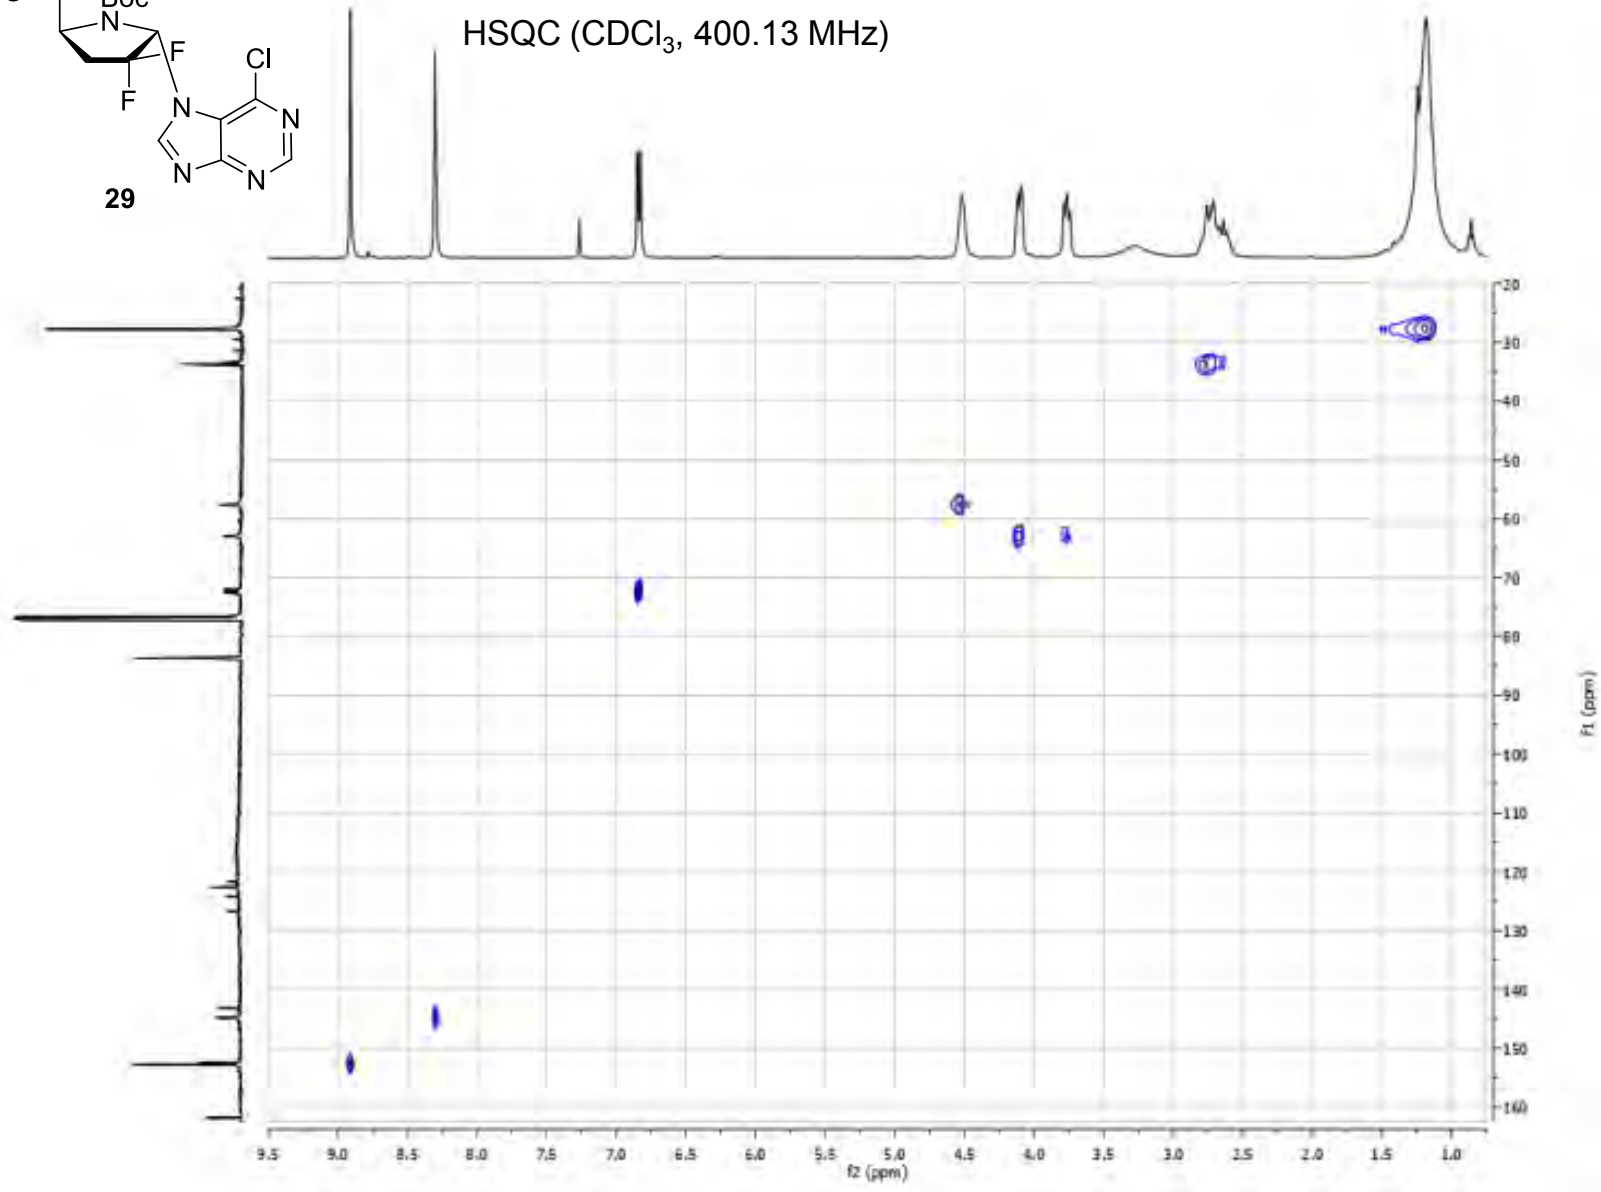

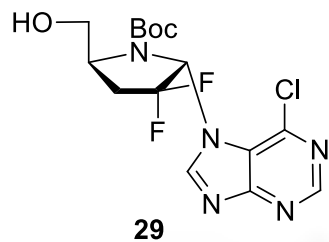

HMBC (CDCl<sub>3</sub>, 400.13 MHz)

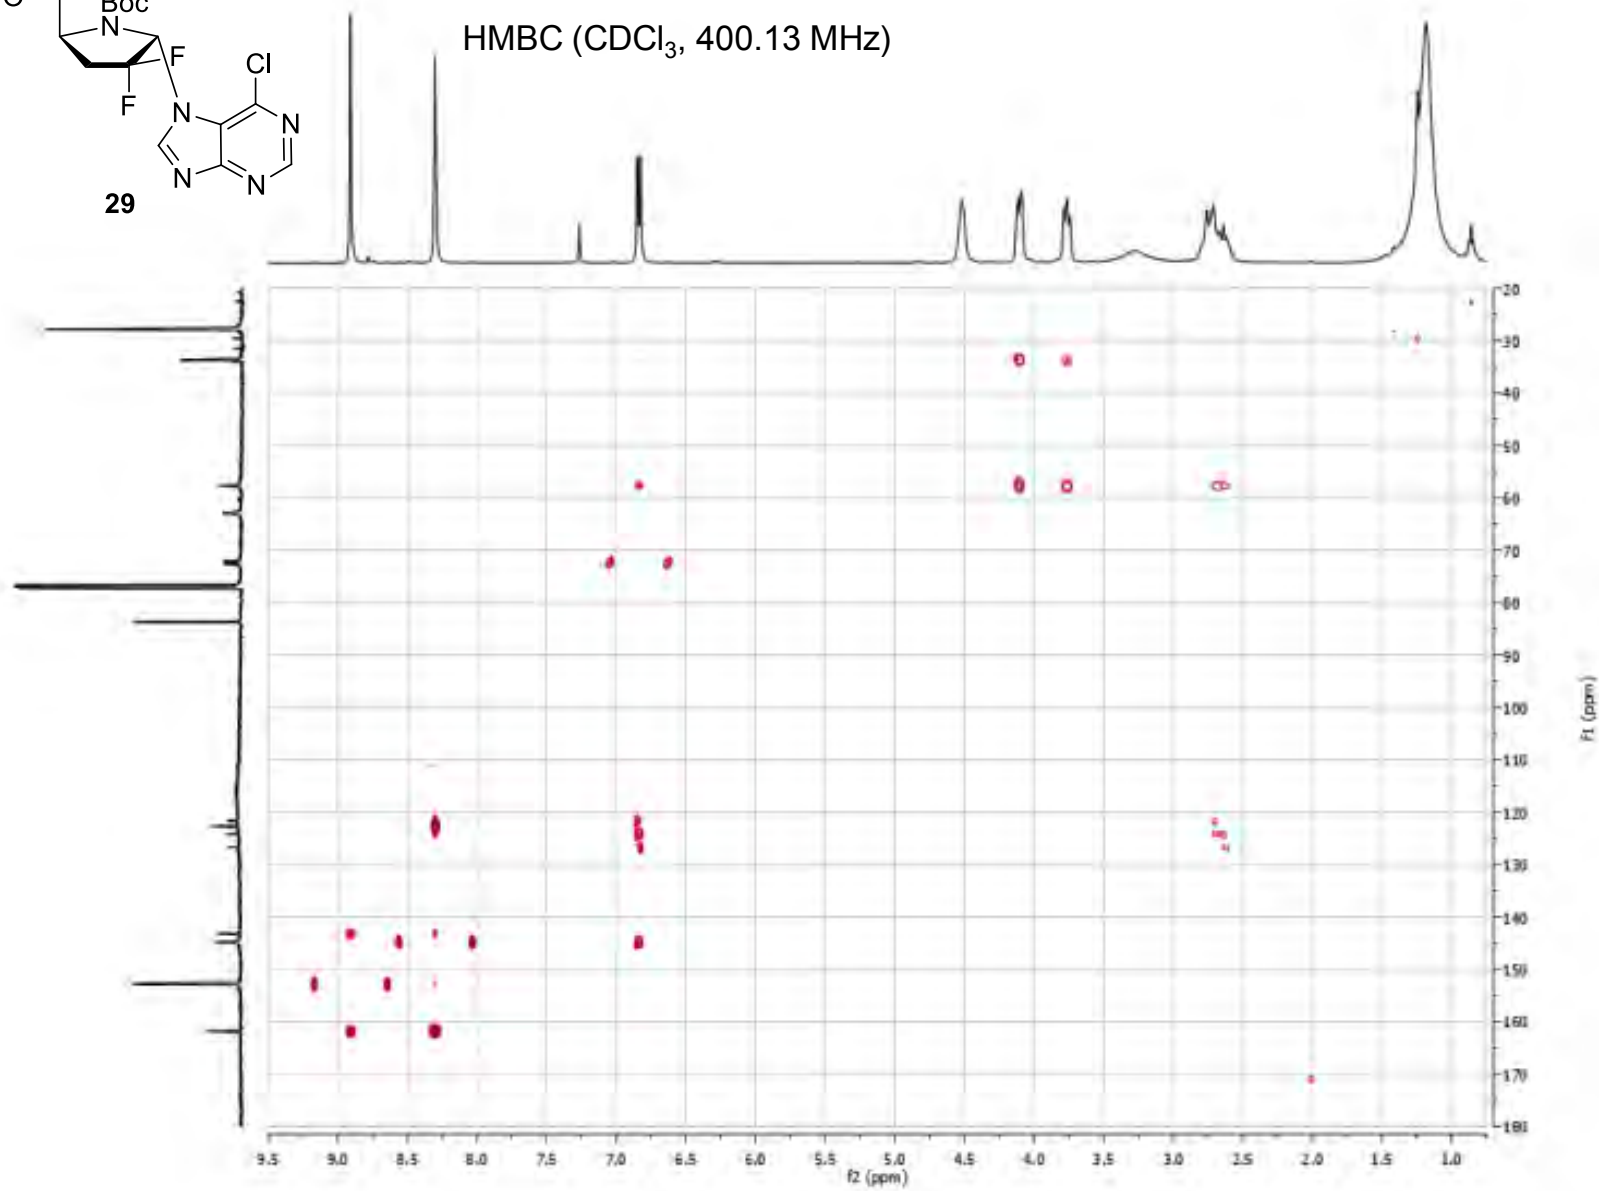

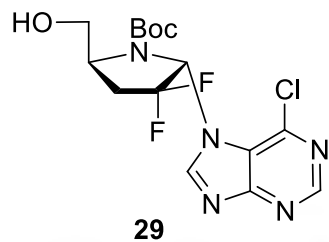

NOESY (CDCl<sub>3</sub>, 400.13 MHz)

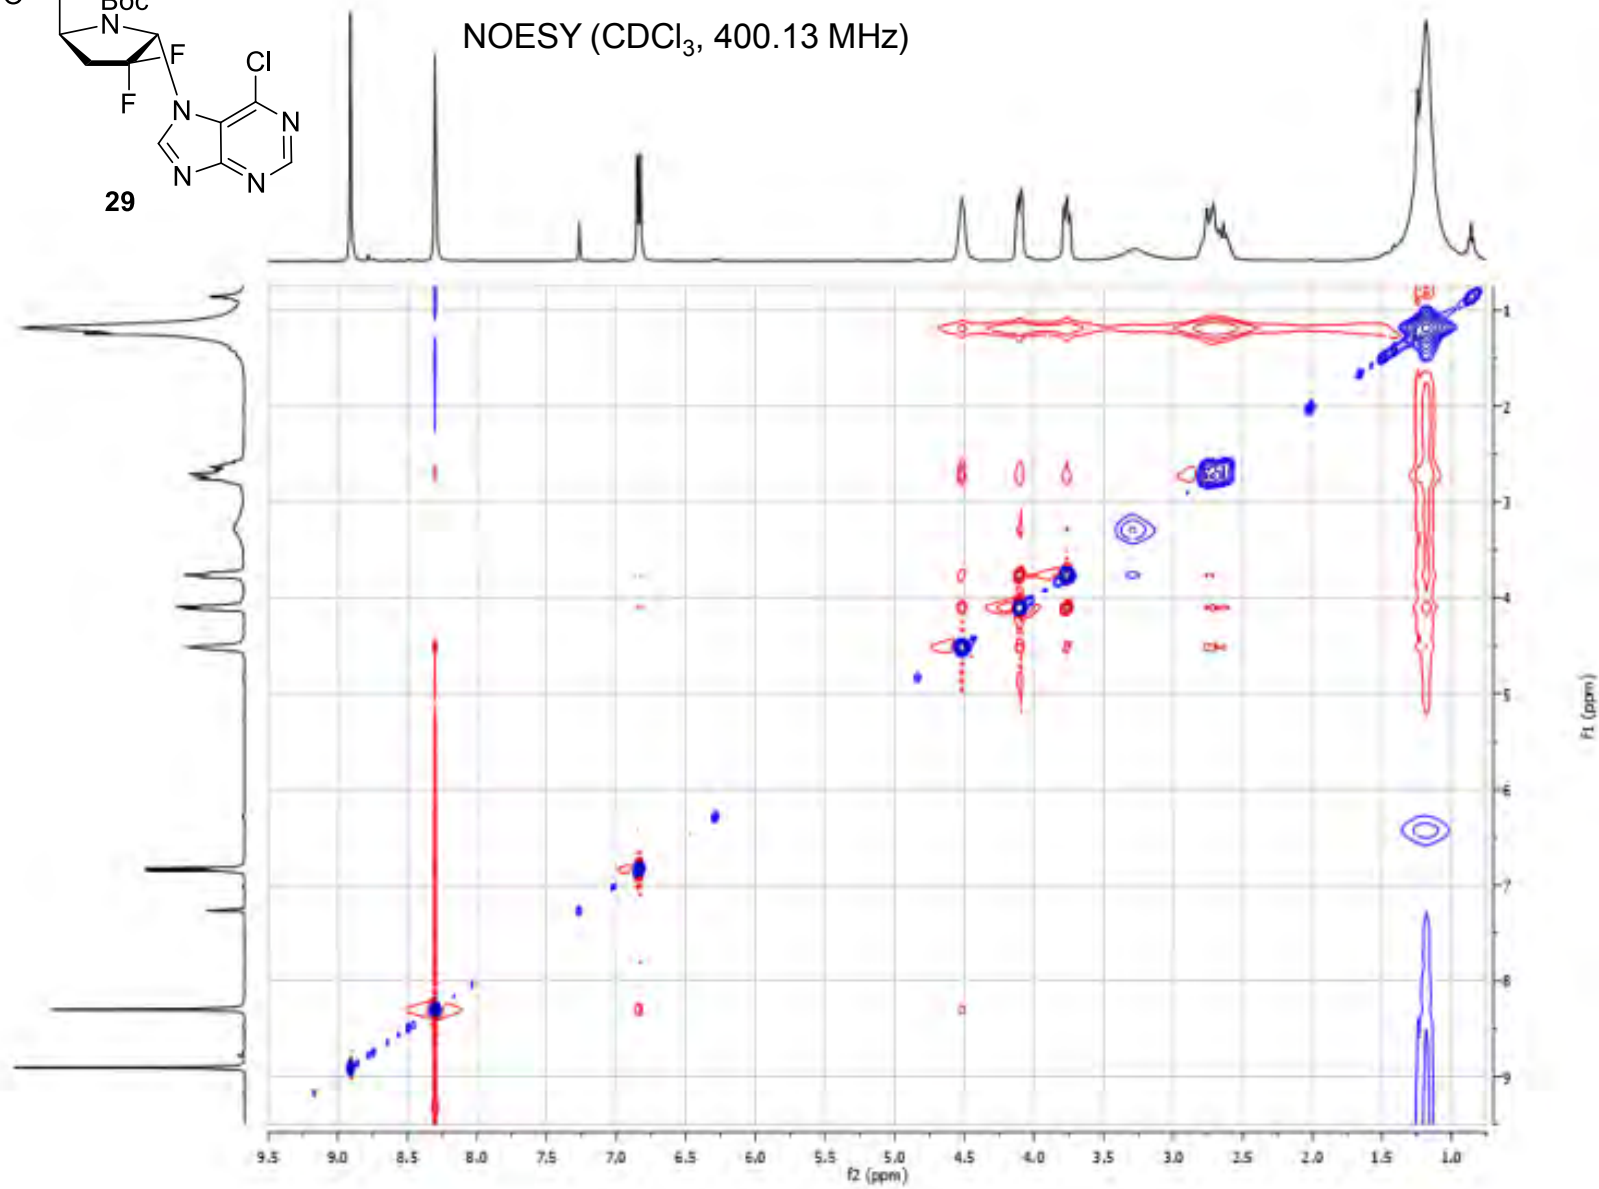

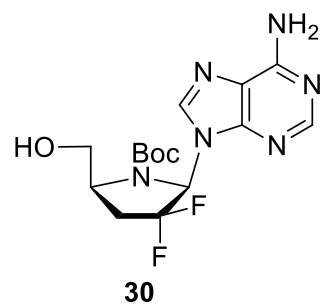

$^1\text{H}$  NMR (THF- $d_8$ , 400.13 MHz)

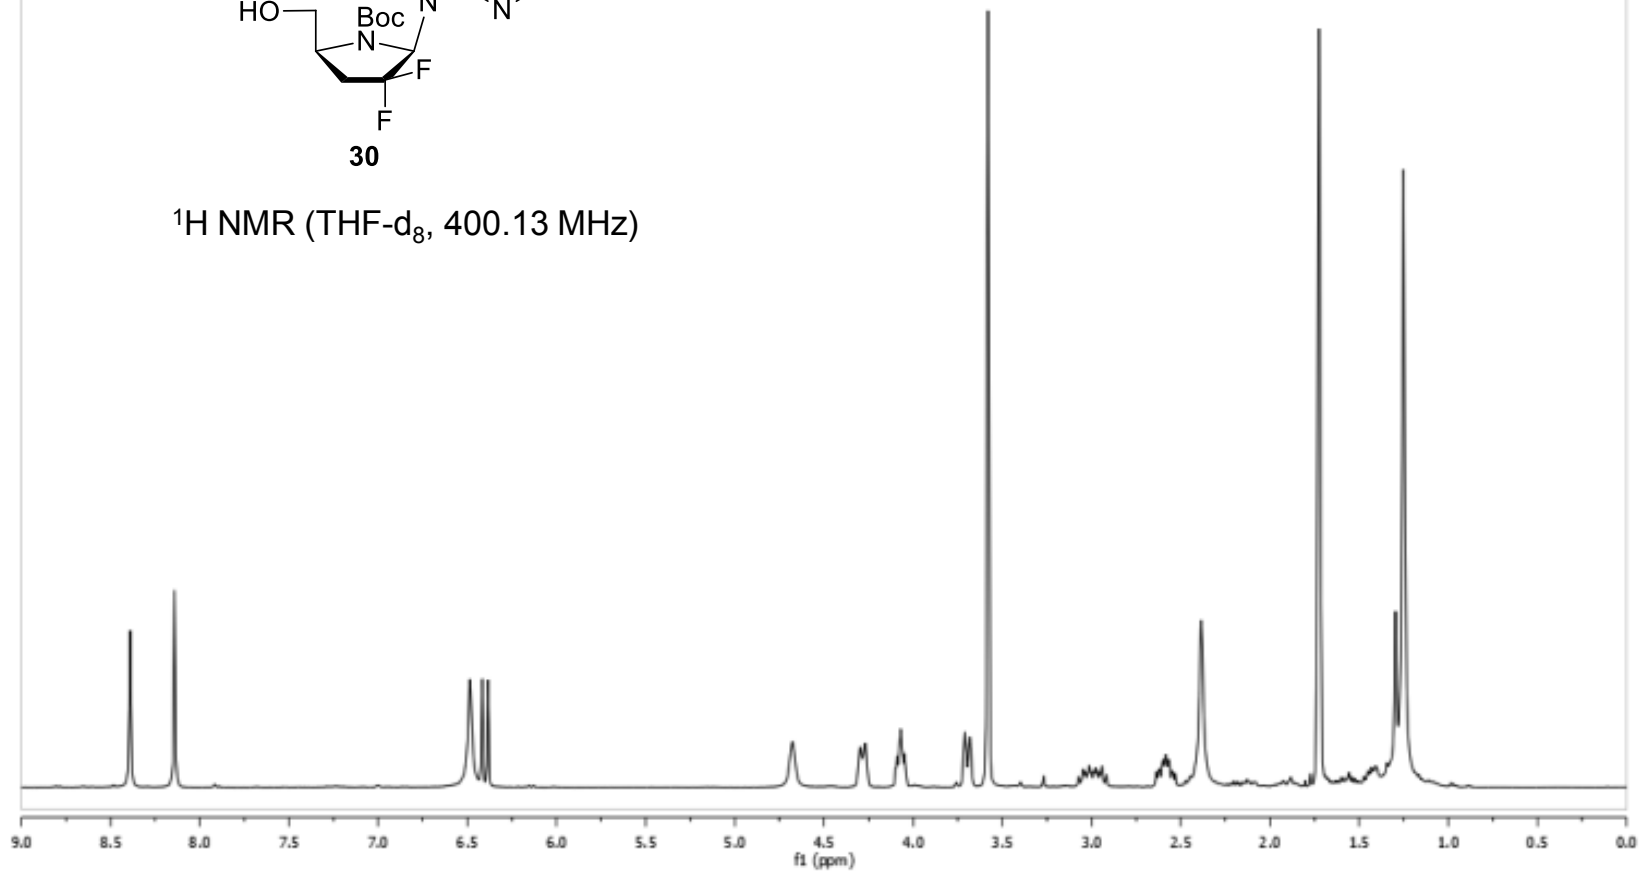



$^{13}\text{C}$  NMR (THF- $d_8$ , 100.6 MHz)

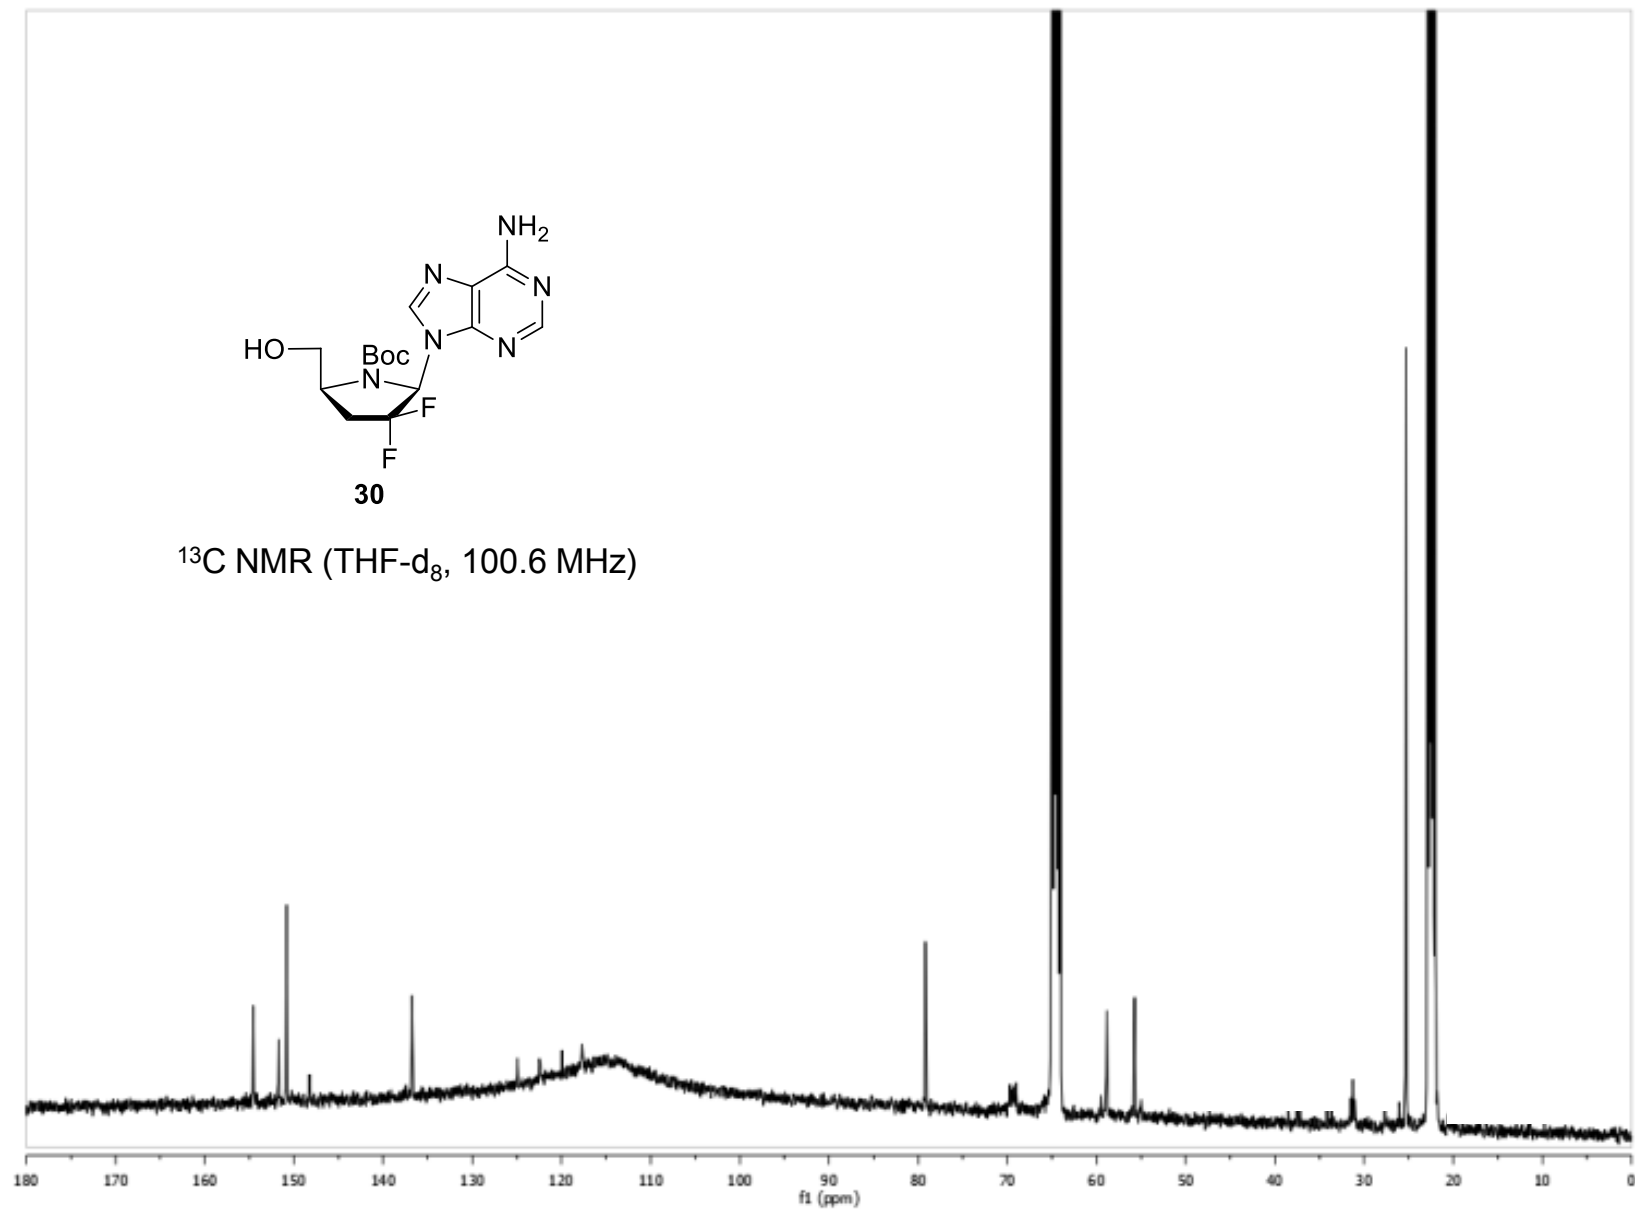

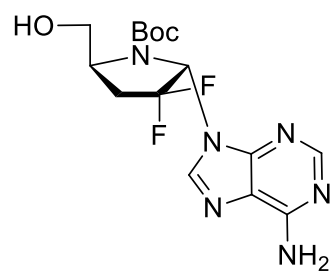

31

$^1\text{H NMR}$  ( $\text{CDCl}_3$ , 400.13 MHz)

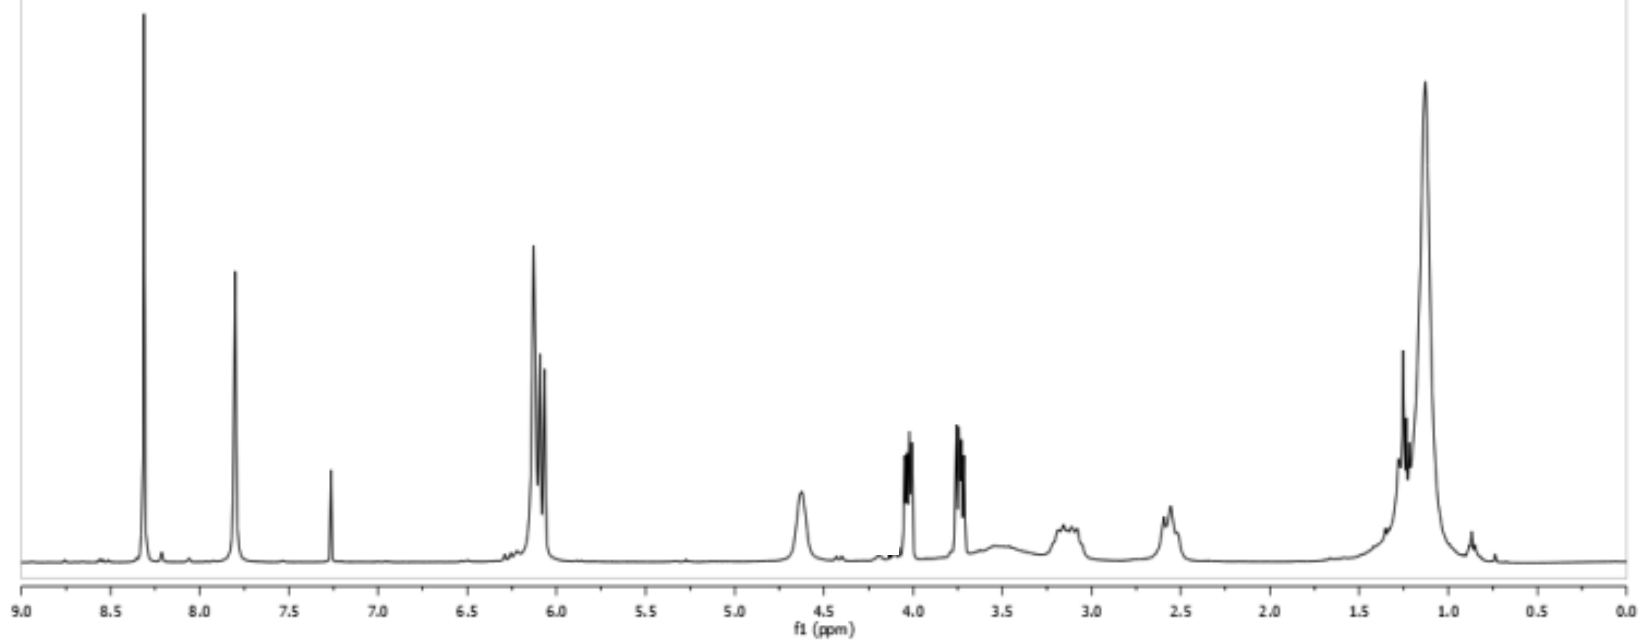



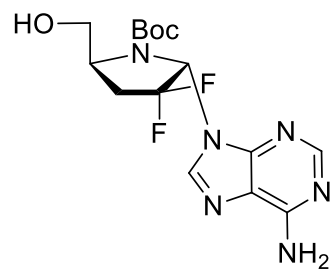

31

$^{13}\text{C}$  NMR ( $\text{CDCl}_3$ , 75.5 MHz)

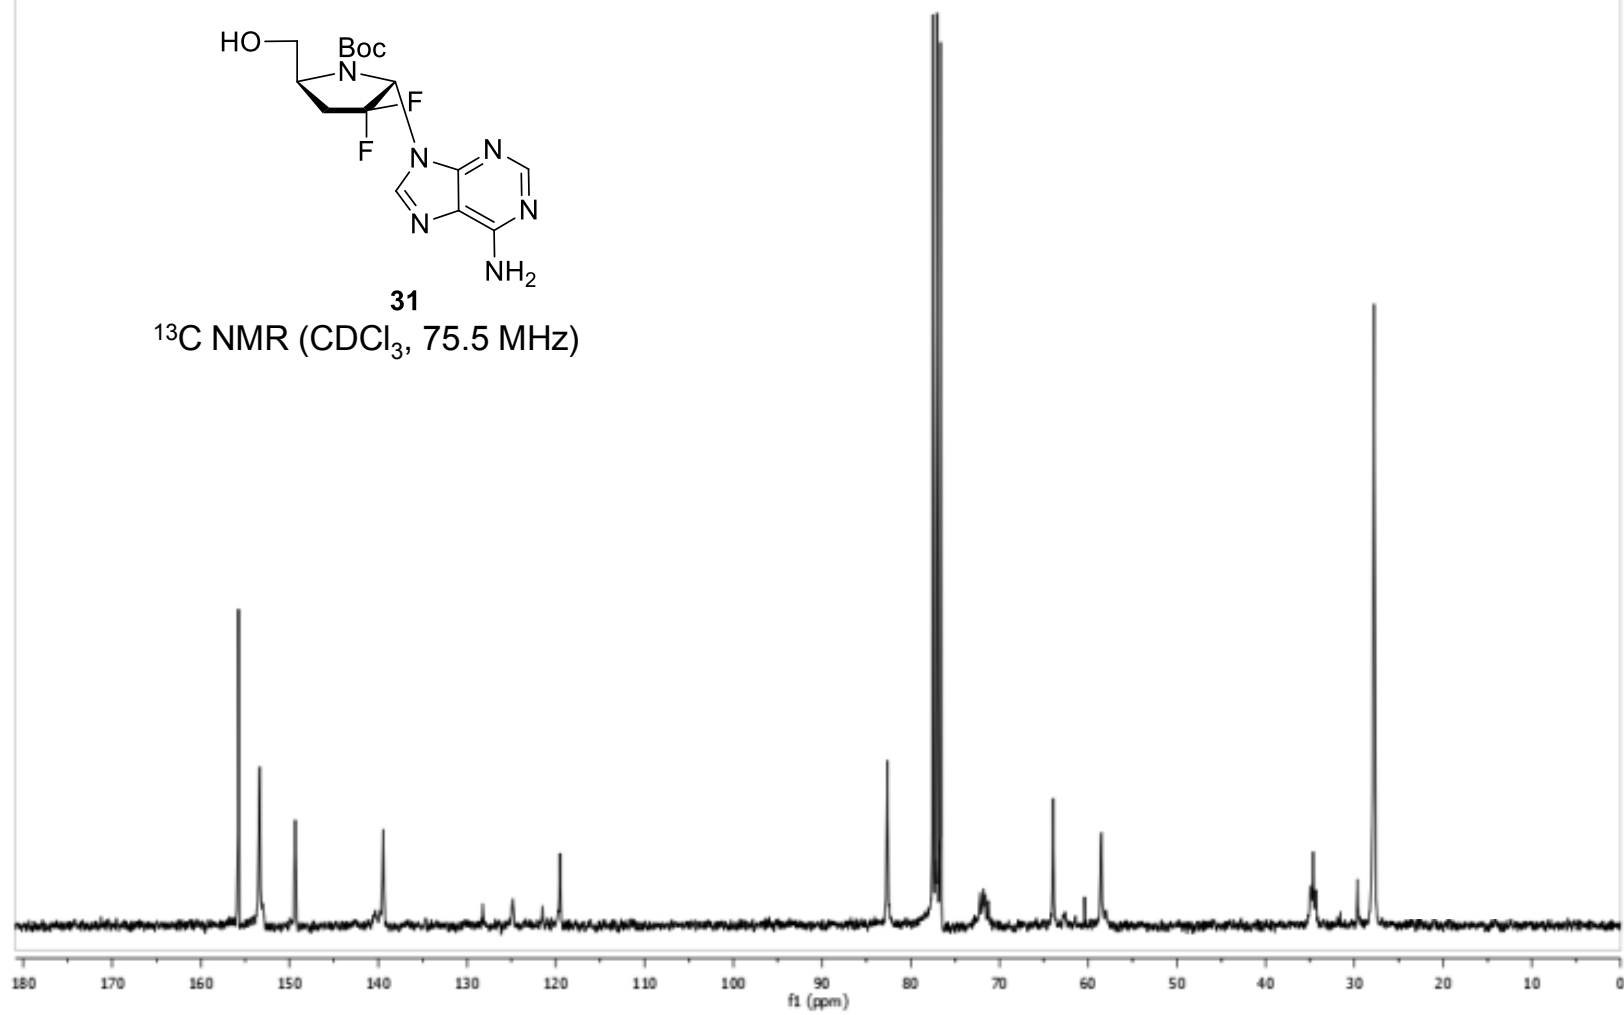

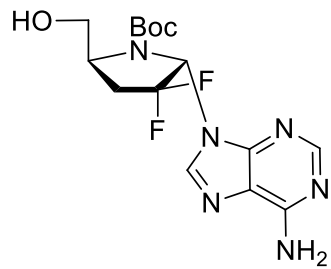

31

DEPT NMR (CDCl<sub>3</sub>, 75.5 MHz)

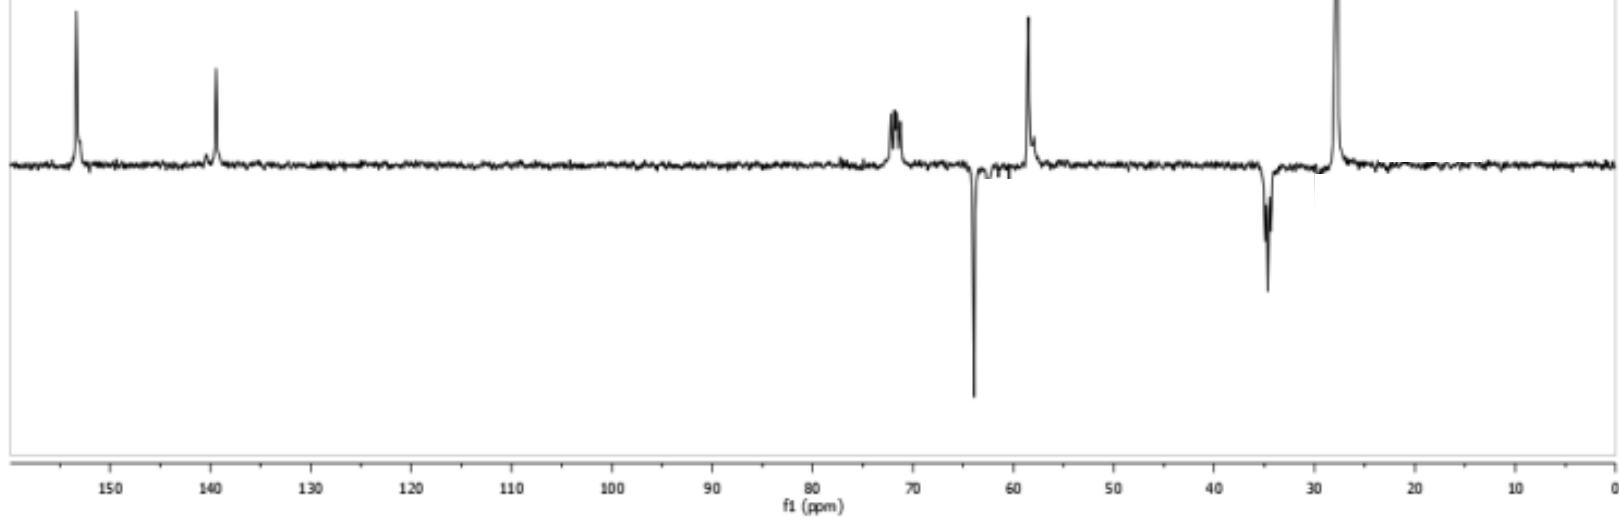

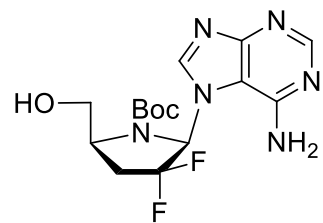

32

$^1\text{H}$  NMR (THF- $d_8$ , 400.13 MHz)

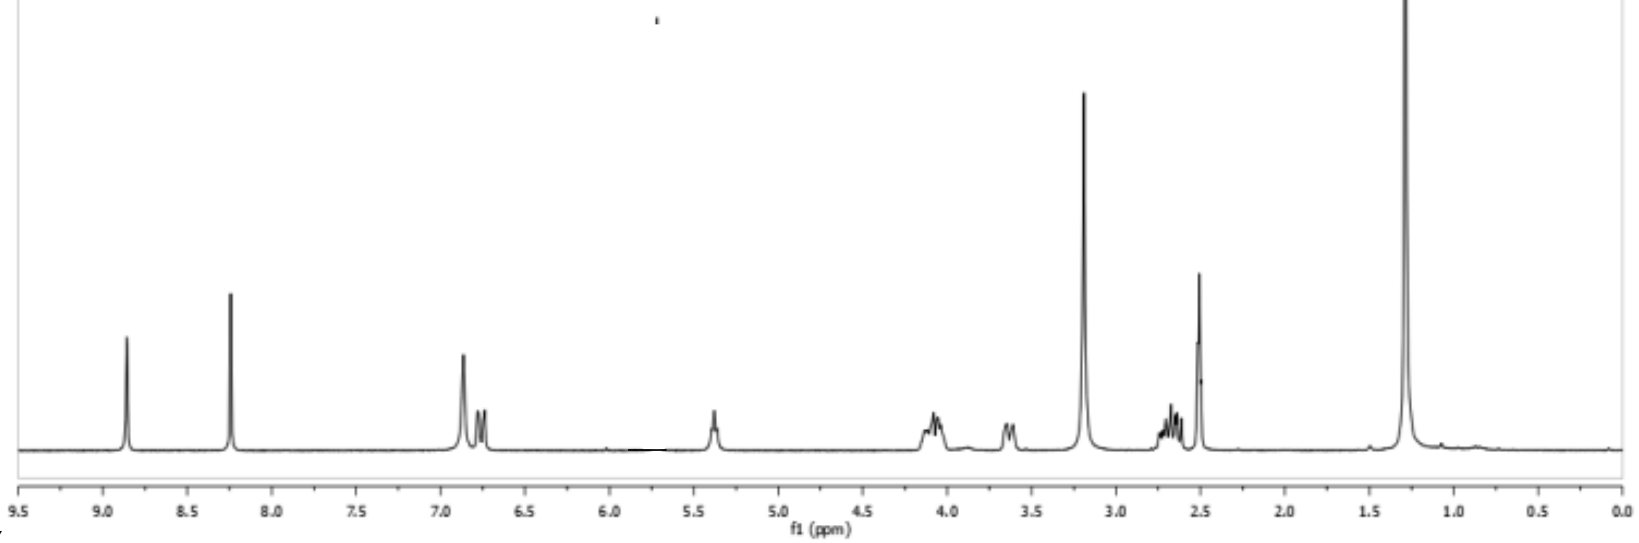

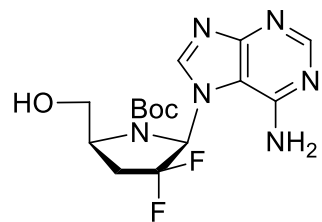

32

<sup>13</sup>C NMR (MeOH-d<sub>4</sub>, 75.5 MHz)

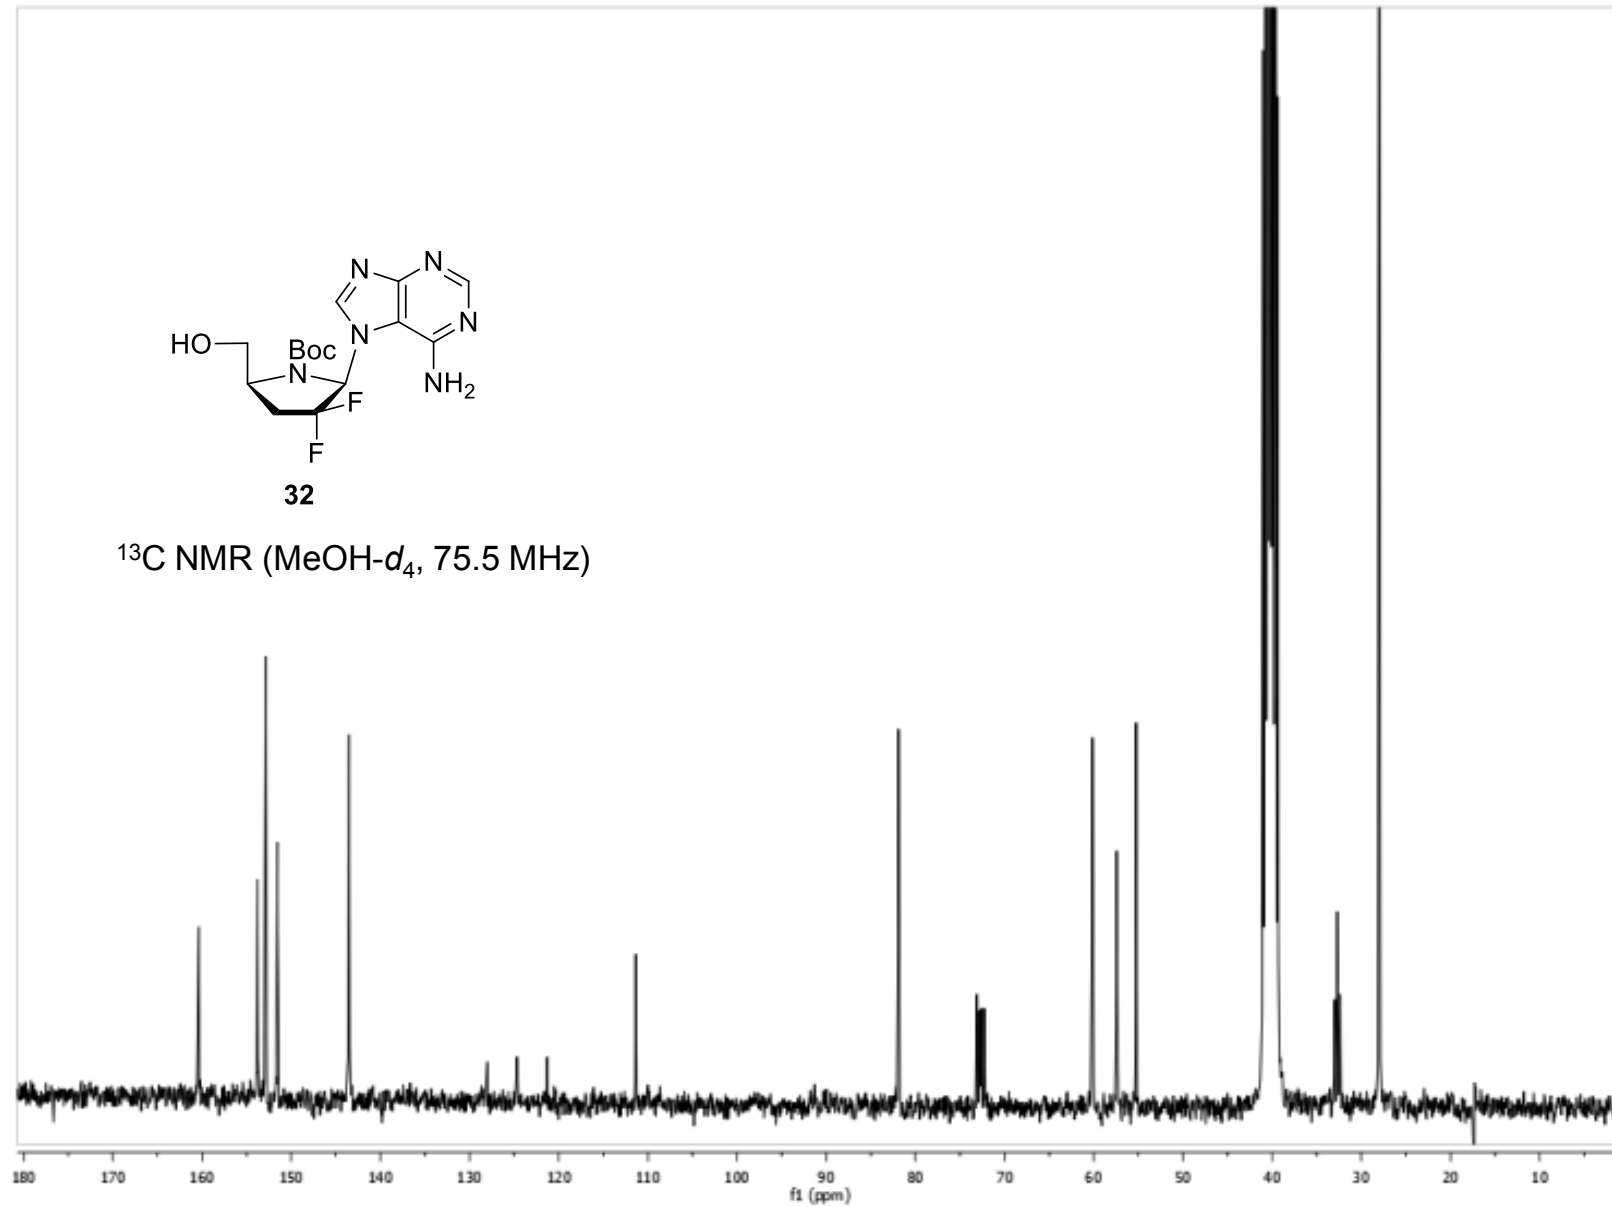

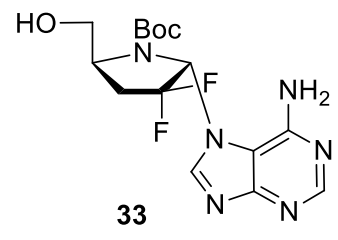

33

<sup>1</sup>H NMR (MeOH-d<sub>4</sub>, 300.13 MHz)

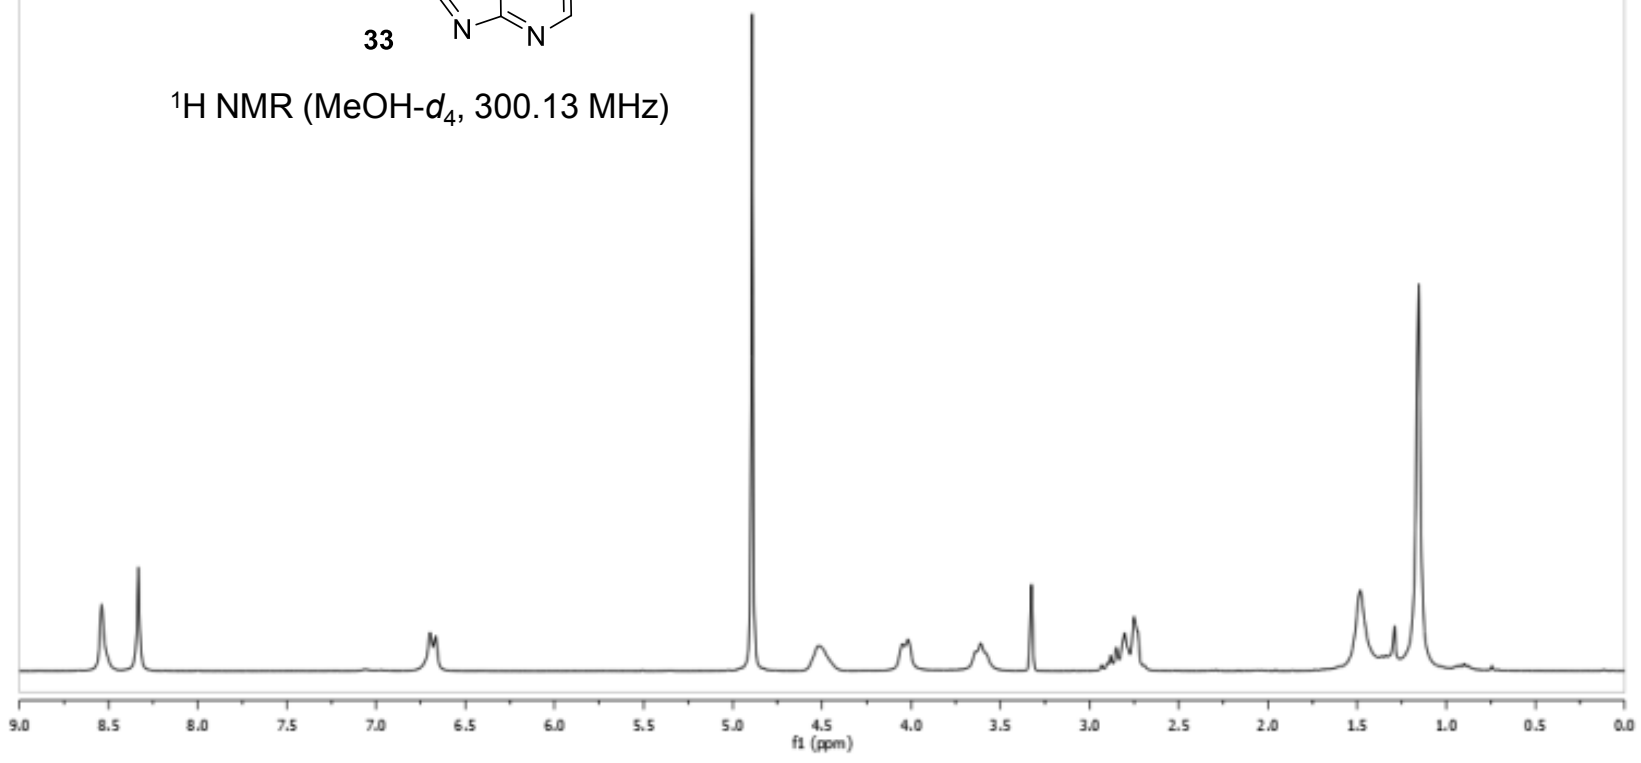

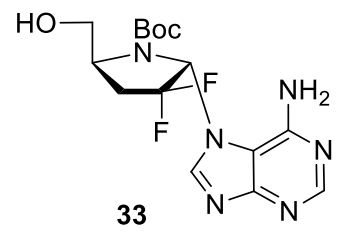

$^{13}\text{C}$  NMR (MeOH- $d_4$ , 75.5 MHz)

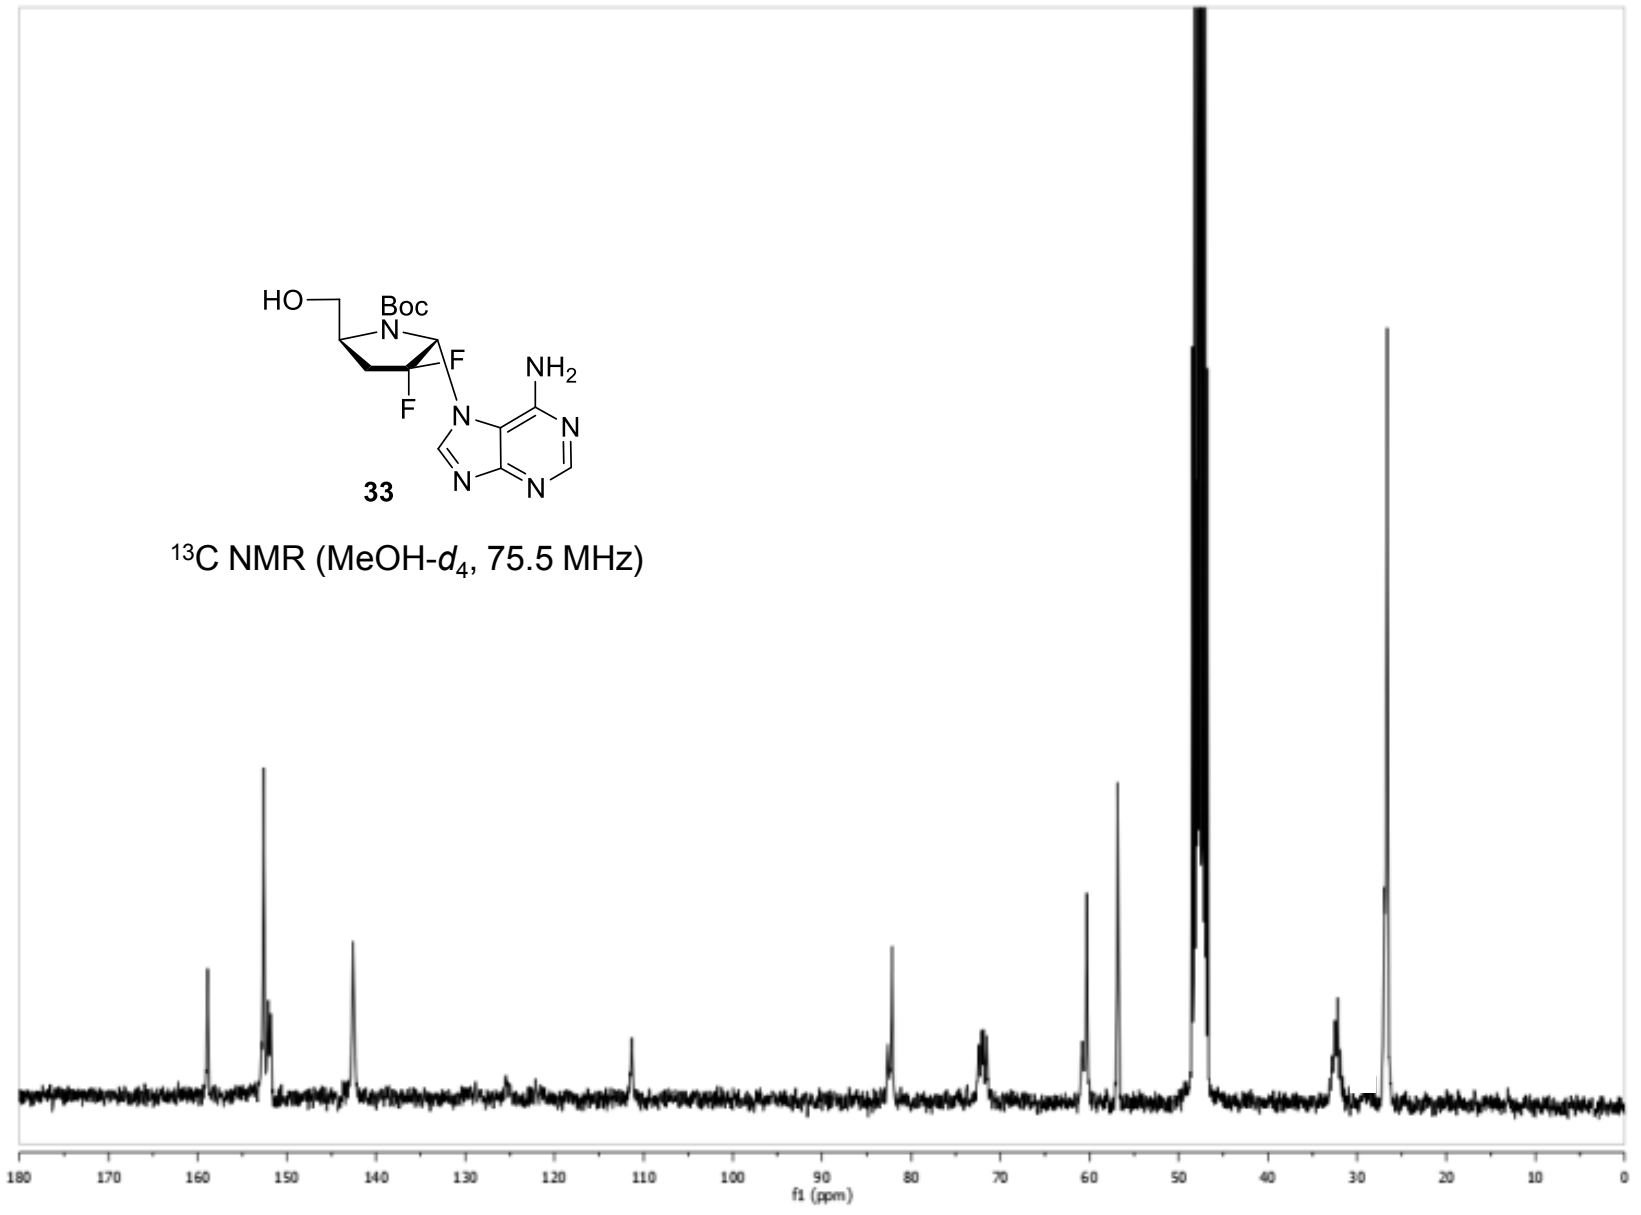



DEPT NMR (MeOH-*d*<sub>4</sub>, 75.5 MHz)

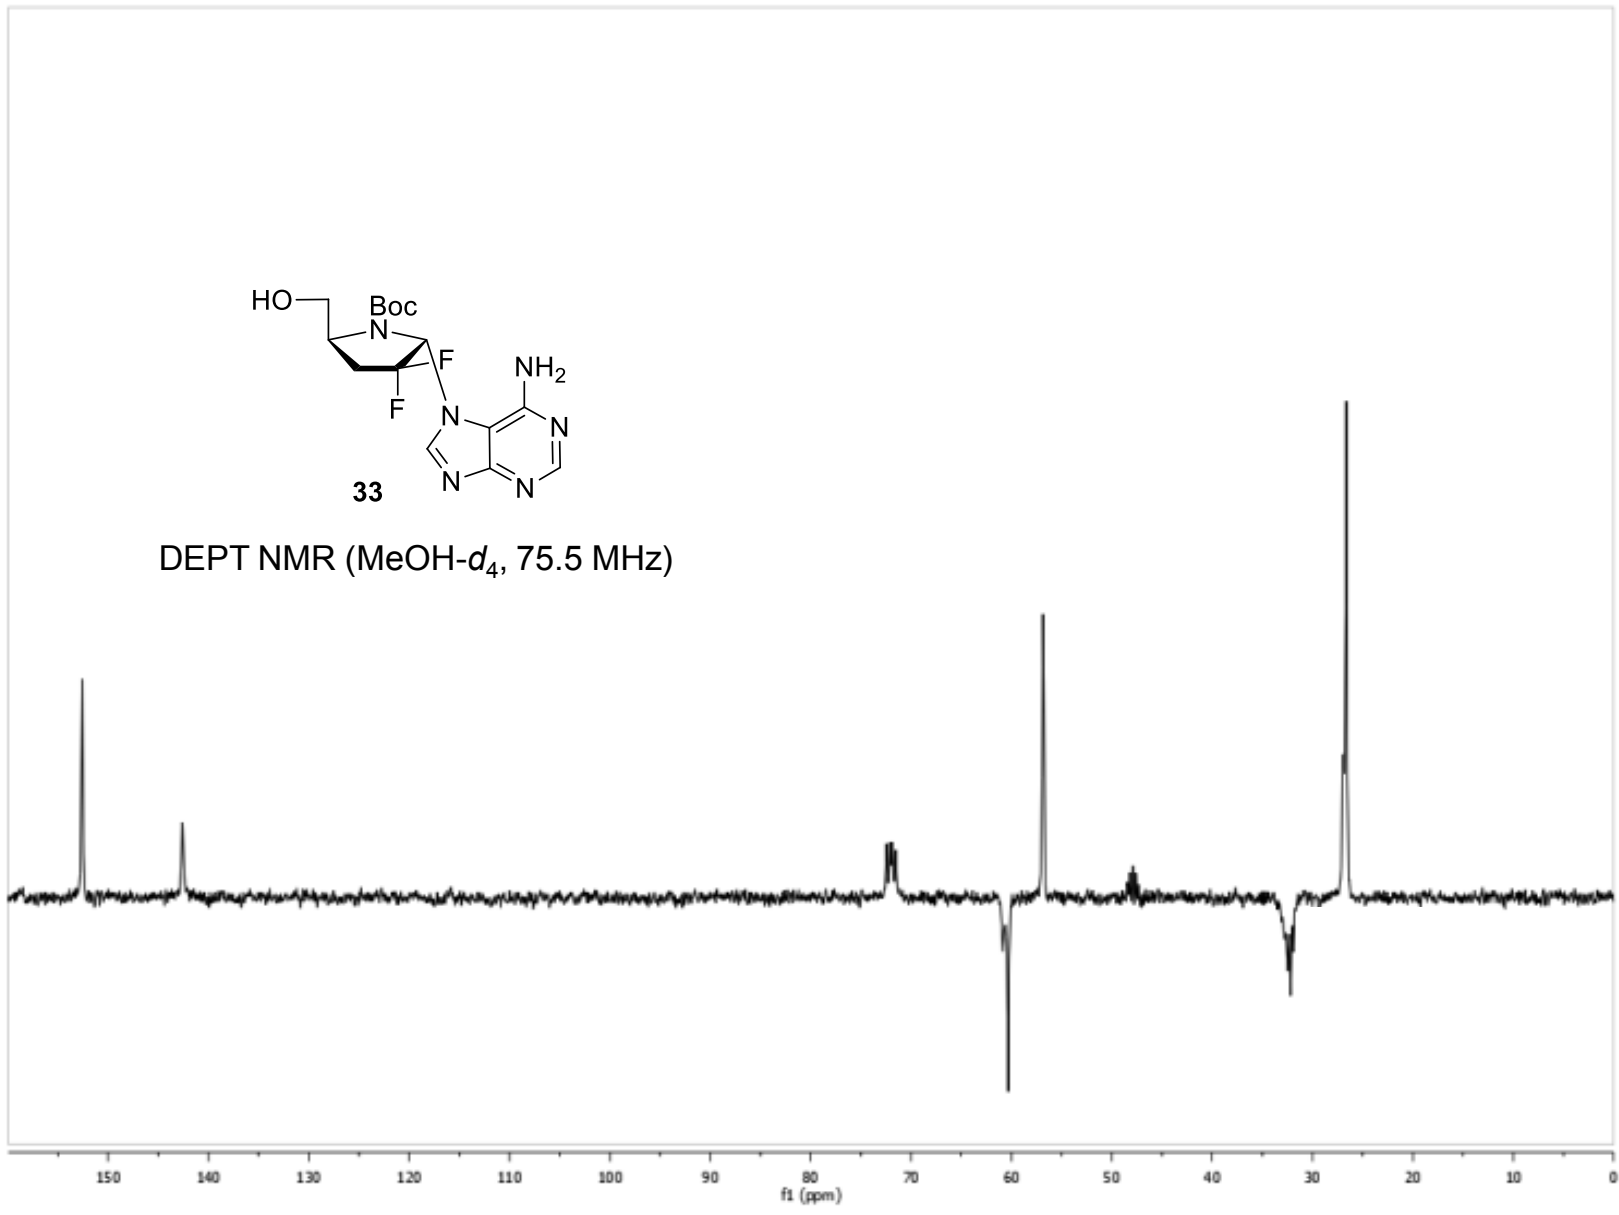

-> HPLC separation for both uracil anomers **16a/17a** after the glycosylation reaction

**Conditions:** Agilent Poroshel 120 SB, C18; mixture (A: MeCN y B: H<sub>2</sub>O) gradient starting at 2.5% of B to reach 95% of B in 5 min; 1 mL/min, 30 °C.

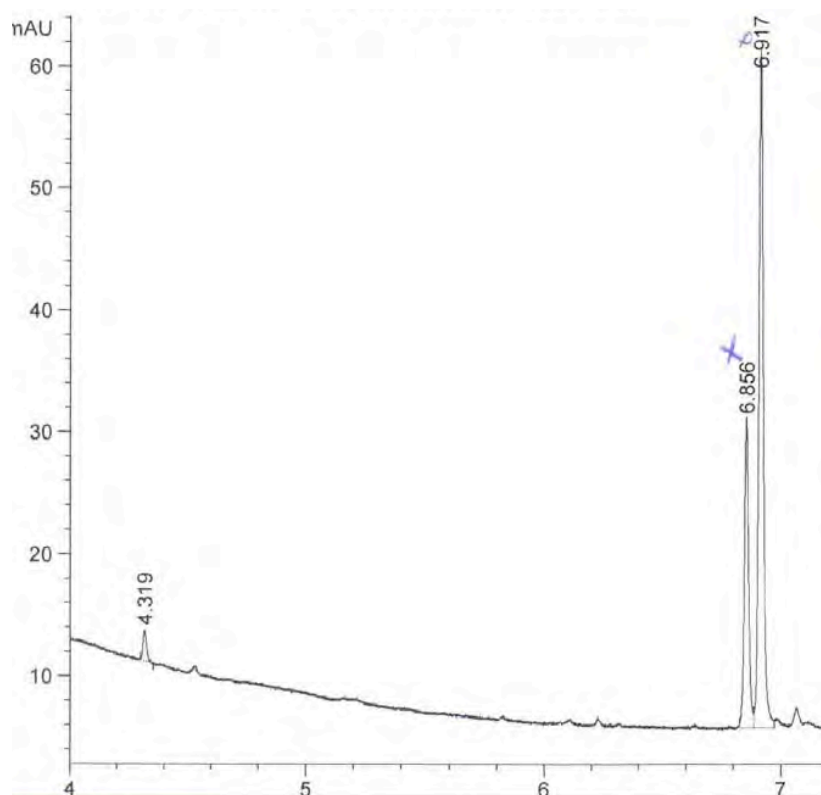

-> HPLC separation for both thymine anomers **18b/19b** (no conditions were found to separate the TBDMS protected nucleosides **16b/17b**). **Conditions:** Mediterranea column C18 (250 x 45), mixture (A: 35% MeCN; B: 65% H<sub>2</sub>O), 1 mL/min, 30 °C.

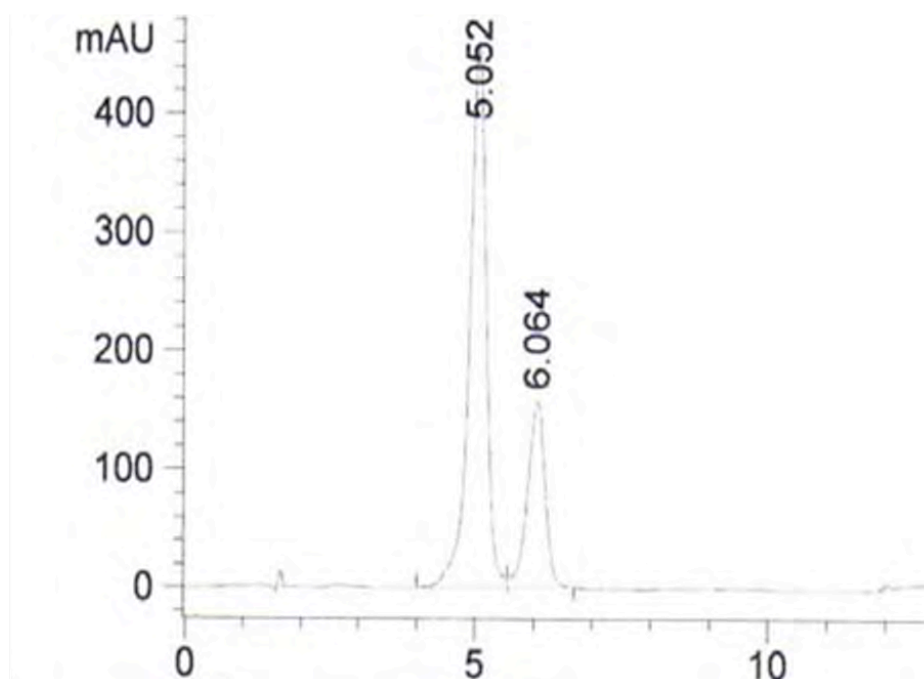



-> HPLC separation for both cytidine anomers **16c/17c** after the glycosylation reaction.

**Conditions:** Agilent Poroshel 120 SB, C18; mixture (A: MeCN y B: H<sub>2</sub>O) gradient starting at 2.5% of B to reach 95% of B in 5 min; 1 mL/min, 30 °C.

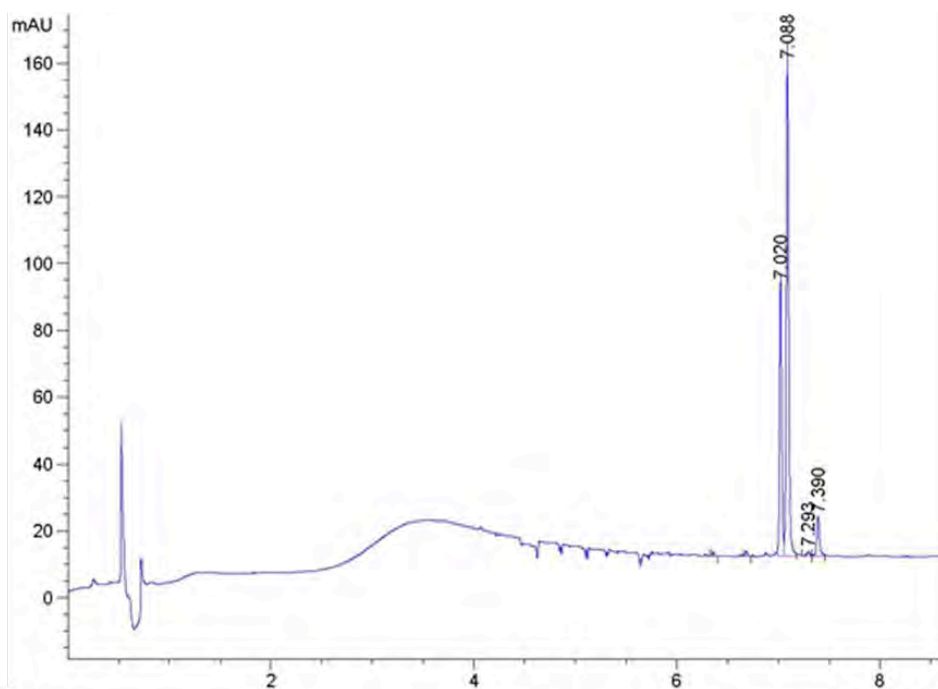

-> HPLC separation for both 5-fluorouracil anomers **16d/17d** after the glycosylation reaction. **Conditions:** Agilent Poroshel 120 SB, C18; mixture (A: MeCN y B: H<sub>2</sub>O) gradient starting at 2.5% of B to reach 95% of B in 5 min; 1 mL/min, 30 °C.

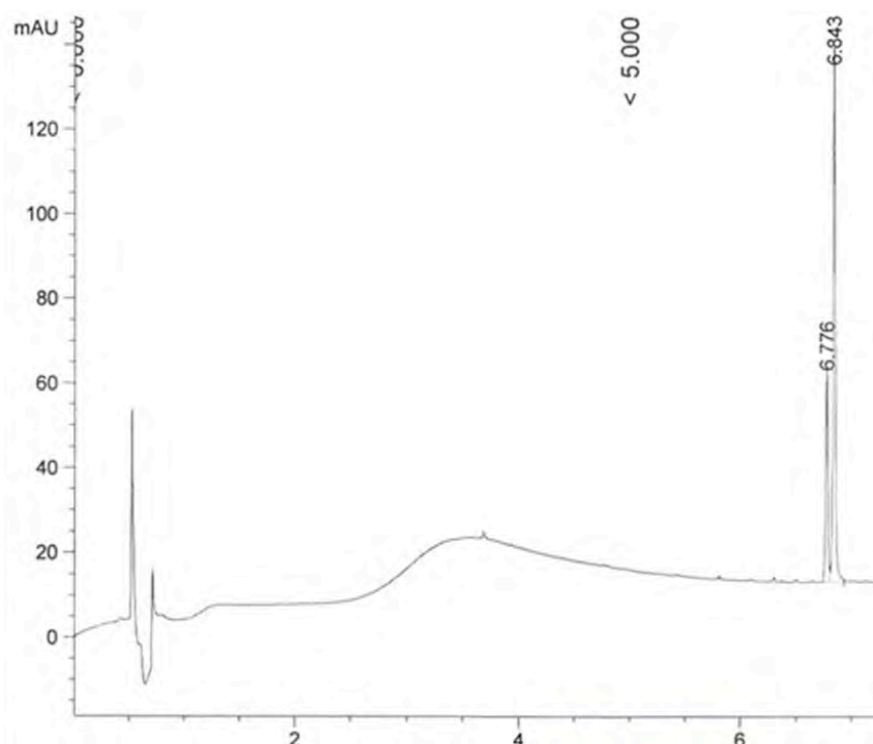

-> HPLC separation for the four anomers **22-25** after glyosilation with 6-chloropurine.

**Conditions:** Mediterranea column C18 (250 x 45), mixture (A: MeCN y B: H<sub>2</sub>O) gradient starting at 40% of B to reach 100% of B in 35 min; 1 mL/min, 30 °C.

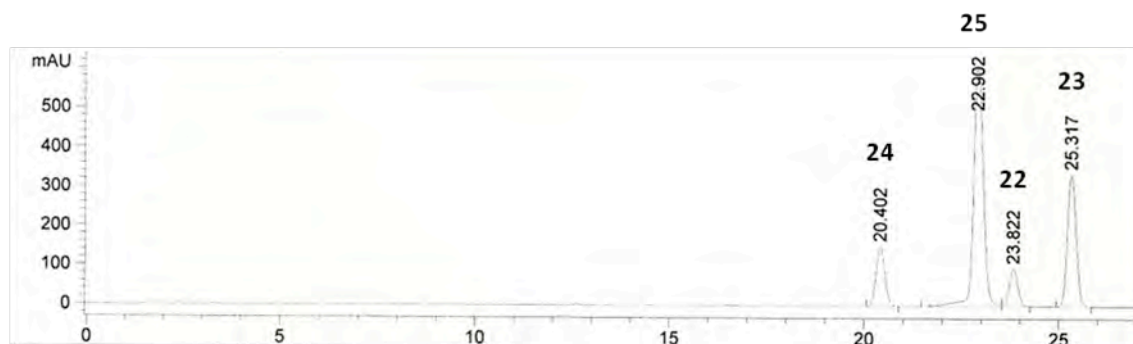

Supplement: NIHMS409777-supplement-01.pdf [file NIHMS409777-supplement-01.pdf]
